# Supplementary material for: Practical synthesis of aromatic nitriles via gallium-catalysed electrophilic cyanation of aromatic C–H bonds
Source: Royal Society of Chemistry journal article supplement (doi:10.1039/c2cc18008a), 2012-01-01

## Practical Synthesis of Aromatic Nitriles via Gallium-catalysed Electrophilic Cyanation of Aromatic C–H Bonds

Kazuhiro Okamoto, Masahito Watanabe, Masahito Murai, Ryo Hatano, and Kouichi Ohe\*

Department of Energy and Hydrocarbon Chemistry, Graduate School of Engineering,  
Kyoto University, Katsura, Nishikyo-ku, Kyoto 615-8510, Japan

e-mail: ohe@scl.kyoto-u.ac.jp

### Supporting Information

**1. General.** NMR spectra were recorded on JEOL EX-400 spectrometer (400 MHz for <sup>1</sup>H NMR and 100 MHz for <sup>13</sup>C NMR). Chemical shifts are reported in δ ppm referenced to CDCl<sub>3</sub> (δ 7.26 for <sup>1</sup>H NMR and δ 77.00 for <sup>13</sup>C NMR). Melting points (mp) are uncorrected. IR spectra were recorded with an FT-IR spectrometer (JASCO FT/IR-460 Plus). Elemental analyses were performed at the Center for Organic Elemental Microanalysis (Kyoto University). High-resolution mass spectra (HRMS) were measured with JEOL JMX-SX 102A spectrometer. Dry 1,2-dichloroethane was purchased from Aldrich. 1,3-Dimethoxy-2,4,6-trideuteriobenzene (**1a-d<sub>3</sub>**)<sup>1</sup> and 2,2'-dimethoxydiphenylacetylene (**7**)<sup>2</sup> were prepared according to the reported procedures. All other materials were purchased and used without further purification.

### 2. Gallium-catalysed cyanation reactions (Tables 1–3, eq. 2).

**2,4-Dimethoxybenzonitrile (2a)** [CAS 4107-65-7]

**2,6-Dimethoxybenzonitrile (2a')** [CAS 16932-49-3]

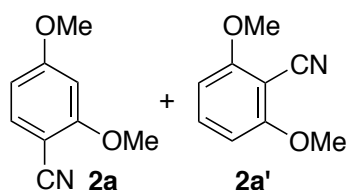

A typical procedure: in a 20-mL Schlenk flask equipped with a J. Young valve, GaCl<sub>3</sub> (7.0 mg, 40 μmol) was dissolved in 1,2-dichloroethane (1.6 mL) under N<sub>2</sub>. Then BrCN<sup>3</sup> (50.8 mg, 0.48 mmol) and arene **1a** (0.40 mmol) was subsequently added to the solution. After stirring at 120 °C for 1 h, the reaction mixture was quenched

(1) S. T. Chadwick, R. A. Rennels, J. L. Rutherford, D. B. Collum, *J. Am. Chem. Soc.* 2000, **122**, 8640.

(2) M. J. Mio, L. C. Kopel, J. B. Braun, T. L. Gadzikwa, K. L. Hull, R. G. Brisbois, C. J. Markworth, P. A. Grieco, *Org. Lett.* 2002, **4**, 3199.

(3) Cyanogen bromide (mp 52 °C) is a commercially available reagent and stable to the air and the moisture. However, the handling of cyanogen bromide requires special care to avoid inhalation of hydrogen cyanide, and all operations should be carried out in a well-fumed hood.

with sat. NaHCO<sub>3</sub> aq and extracted with EtOAc three times. The combined organic layer was dried over MgSO<sub>4</sub>, filtered, and concentrated under vacuum. The residue was subjected to column chromatography on silica gel (hexane/EtOAc = 20/1) to afford 53.2 mg of aromatic nitriles **2a** and **2a'** (0.33 mmol, 83% yield, **2a/2a'** = 95:5) as a white solid. Mp 93–94 °C.

(Major isomer **2a**) <sup>1</sup>H NMR (CDCl<sub>3</sub>): δ 3.86 (s, 3H), 3.91 (s, 3H), 6.46 (d, *J* = 2.0 Hz, 1H), 6.51 (dd, *J* = 8.3, 1.5 Hz, 1H), 7.47 (d, *J* = 8.8 Hz, 1H). <sup>13</sup>C NMR (CDCl<sub>3</sub>): δ 55.6, 55.9, 93.8, 98.4, 105.8, 116.8, 134.8, 162.8, 164.6.

#### 2,4-Dimethoxy-3-methylbenzonitrile (**2b**) [CAS 81574-51-8]

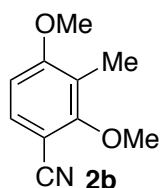

A pale yellow solid (58.0 mg, 0.33 mmol, 83% yield). Mp 48–49 °C. <sup>1</sup>H NMR (CDCl<sub>3</sub>): δ 2.13 (s, 3H), 3.88 (s, 3H), 3.95 (s, 3H), 6.66 (d, *J* = 8.8 Hz, 1H), 7.41 (d, *J* = 8.8 Hz, 1H). <sup>13</sup>C NMR (CDCl<sub>3</sub>): δ 8.7, 55.9, 61.6, 98.1, 106.2, 117.3, 120.7, 131.9, 161.2, 162.4.

#### 2,3,4-Trimethoxybenzonitrile (**2c**) [CAS 43020-38-8]

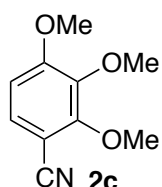

A pale yellow solid (52.0 mg, 0.27 mmol, 68% yield). Mp 49–50 °C. <sup>1</sup>H NMR (CDCl<sub>3</sub>): δ 3.87 (s, 3H), 3.92 (s, 3H), 4.06 (s, 3H), 6.68 (d, *J* = 8.8 Hz, 1H), 7.28 (d, *J* = 8.8 Hz, 1H). <sup>13</sup>C NMR (CDCl<sub>3</sub>): δ 56.3, 61.1, 61.8, 99.2, 107.5, 116.5, 128.8, 141.9, 155.9, 158.0.

#### 3,5-Dimethoxy-1,1'-biphenyl-2-carbonitrile (**2d**)

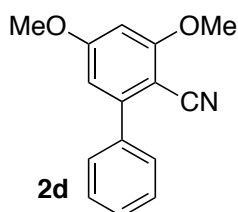

A pale yellow solid (74.2 mg, 0.31 mmol, 78% yield). Mp 74–75 °C. IR (KBr): 2216, 1601, 1573, 1349, 1206, 778 cm<sup>-1</sup>. <sup>1</sup>H NMR (CDCl<sub>3</sub>): δ 3.88 (s, 3H), 3.94 (s, 3H), 6.46 (d, *J* = 2.0 Hz, 1H), 6.55 (d, *J* = 2.0 Hz, 1H), 7.38–7.50 (m, 3H), 7.54 (d, *J* =

8.3 Hz, 2H).  $^{13}\text{C}$  NMR ( $\text{CDCl}_3$ ):  $\delta$  55.7, 56.1, 93.3, 96.9, 106.9, 116.4, 128.4, 128.5, 128.7, 138.2, 148.5, 163.6, 163.8. Elemental analysis calcd for  $\text{C}_{15}\text{H}_{13}\text{O}_2\text{N}$ , C: 75.30; H: 5.48; N: 5.85, found C: 75.18; H: 5.85; N: 5.62.

### 3,3',5,5'-Tetramethoxy-1,1'-biphenyl-2-carbonitrile (**2e**)

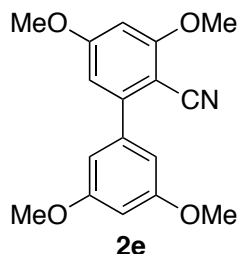

A pale yellow solid (35.8 mg, 0.12 mmol, 30% yield). Mp 116–117 °C. IR (KBr): 2213, 1540, 1456, 1283, 1206, 823  $\text{cm}^{-1}$ .  $^1\text{H}$  NMR ( $\text{CDCl}_3$ ):  $\delta$  3.84 (s, 6H), 3.88 (s, 3H), 3.94 (s, 3H), 6.46 (d,  $J = 2.4$  Hz, 1H), 6.52 (t,  $J = 2.4$  Hz, 1H), 6.56 (d,  $J = 2.0$  Hz, 1H), 6.67 (d,  $J = 2.4$  Hz, 2H).  $^{13}\text{C}$  NMR ( $\text{CDCl}_3$ ):  $\delta$  55.4, 55.7, 56.2, 93.4, 97.1, 100.9, 106.7, 106.8, 116.3, 140.1, 148.5, 160.7, 163.6, 163.7. HRMS (FAB) calcd for  $\text{C}_{17}\text{H}_{18}\text{NO}_4$  ( $\text{M}+\text{H}$ ) $^+$  300.1236, found 300.1242. Elemental analysis calcd for  $\text{C}_{17}\text{H}_{17}\text{NO}_4$ , C: 68.21; H: 5.72; N: 4.68, found C: 67.93; H: 5.72; N: 4.39.

### 5-Methoxy-1,1'-biphenyl-2-carbonitrile (**2f**) [CAS 500309-63-7]

### 3-Methoxy-1,1'-biphenyl-4-carbonitrile (**2f'**)

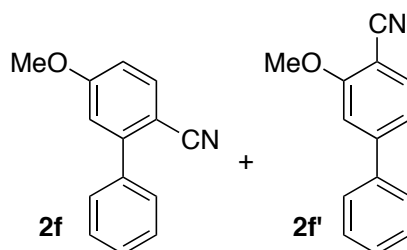

A pale yellow solid (50.2 mg, 0.24 mmol, 60% yield). Mp (a regioisomeric mixture) 74–75 °C. IR (KBr): 2224, 1498, 1294, 1024, 734  $\text{cm}^{-1}$ . Two regioisomers were assigned by NMR spectra (**2f**/**2f'** = 6:1).<sup>4</sup>

**2f** (Major isomer):  $^1\text{H}$  NMR ( $\text{CDCl}_3$ ):  $\delta$  3.88 (s, 3H), 6.93 (dd,  $J = 8.3, 2.4$  Hz, 1H), 6.98 (d,  $J = 2.4$  Hz, 1H), 7.40–7.52 (m, 3H), 7.55 (d,  $J = 7.8$  Hz, 2H), 7.67 (d,  $J = 8.3$  Hz, 1H).  $^{13}\text{C}$  NMR ( $\text{CDCl}_3$ ):  $\delta$  55.6, 103.0, 113.4, 115.4, 119.0, 128.5, 128.6, 128.7, 135.3, 138.1, 147.5, 162.6.

**2f'** (Minor isomer):  $^1\text{H}$  NMR ( $\text{CDCl}_3$ ):  $\delta$  3.99 (s, 3H), 7.14 (s, 1H), 7.21 (d,  $J = 8.3$  Hz, 1H), 7.40–7.52 (m, 5H), 7.60 (d,  $J = 8.3$  Hz, 1H).  $^{13}\text{C}$  NMR ( $\text{CDCl}_3$ ):  $\delta$  56.0, 100.4, 110.0, 116.5, 119.7, 128.5, 128.7, 129.0, 133.8, 139.5, 147.7, 161.4.

(4) W. Li, Z. Xu, P. Sun, X. Jiang, M. Fang, *Org. Lett.* 2011, **13**, 1286.

**4-Methoxy-1-naphthonitrile (2g)** [CAS 52449-79-3]

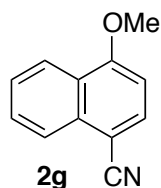

A white solid (45.0 mg, 0.25 mmol, 63% yield). Mp 102–103 °C.  $^1\text{H}$  NMR ( $\text{CDCl}_3$ ):  $\delta$  6.83 (d,  $J = 8.3$  Hz, 1H), 7.58 (t,  $J = 7.6$  Hz, 1H), 7.69 (t,  $J = 8.3$  Hz, 1H), 7.85 (d,  $J = 7.8$  Hz, 1H), 8.16 (d,  $J = 8.3$  Hz, 1H), 8.31 (d,  $J = 8.3$  Hz, 1H).  $^{13}\text{C}$  NMR ( $\text{CDCl}_3$ ):  $\delta$  55.9, 101.9, 103.3, 118.4, 122.7, 124.9, 125.2, 126.7, 128.9, 133.4, 134.0, 159.4.

**2-Methoxy-1-naphthonitrile (2h)** [CAS 16000-39-8]

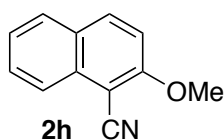

A pale yellow solid (58.8 mg, 0.32 mmol, 80% yield). Mp 94–95 °C.  $^1\text{H}$  NMR ( $\text{CDCl}_3$ ):  $\delta$  7.27 (d,  $J = 8.8$  Hz, 1H), 7.45 (t,  $J = 7.8$  Hz, 1H), 7.64 (t,  $J = 7.8$  Hz, 1H), 7.82 (d,  $J = 8.3$  Hz, 1H), 8.03 (d,  $J = 9.2$  Hz, 1H), 8.09 (d,  $J = 8.3$  Hz, 1H).  $^{13}\text{C}$  NMR ( $\text{CDCl}_3$ ):  $\delta$  56.6, 95.2, 112.0, 115.6, 124.0, 125.0, 128.0, 128.4, 129.1, 133.5, 135.0, 161.2.

**9-Anthracenecarbonitrile (2i)** [CAS 1210-12-4]

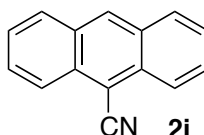

A yellow solid (66.3 mg, 0.33 mmol, 83% yield). Mp 178–179 °C.  $^1\text{H}$  NMR ( $\text{CDCl}_3$ ):  $\delta$  7.59 (t,  $J = 7.6$  Hz, 2H), 7.72 (t,  $J = 7.1$  Hz, 2H), 8.08 (d,  $J = 7.8$  Hz, 2H), 8.42 (d,  $J = 8.3$  Hz, 2H), 8.68 (s, 1H).  $^{13}\text{C}$  NMR ( $\text{CDCl}_3$ ):  $\delta$  105.3, 117.2, 125.2, 126.3, 128.86, 128.88, 130.5, 132.6, 133.2.

In the large-scale cyanation reaction, the crude product was purified by recrystallisation from hexane/ $\text{CHCl}_3$  to give 1.59 g of nitrile **2i** (7.8 mmol, 78% yield).

**10-Methyl-9-anthracenecarbonitrile (2j)** [CAS 1467-01-2]

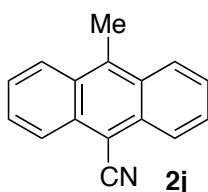

A yellow solid (74.1 mg, 0.34 mmol, 85% yield). Mp 203–204 °C.  $^1\text{H}$  NMR ( $\text{CDCl}_3$ ):  $\delta$  3.17 (s, 3H), 7.61 (t,  $J = 7.6$  Hz, 1H), 7.71 (t,  $J = 7.6$  Hz, 1H), 8.35 (d,  $J = 8.8$  Hz, 1H), 8.44 (d,  $J = 8.8$  Hz, 1H).  $^{13}\text{C}$  NMR ( $\text{CDCl}_3$ ):  $\delta$  14.6, 104.0, 117.6, 125.2, 125.8, 126.0, 128.2, 129.1, 132.6, 137.9.

**1-Pyrenecarbonitrile (2k)** [CAS 4107-64-6]

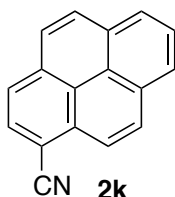

A pale yellow solid (80.0 mg, 0.35 mmol, 88% yield). Mp 154–155 °C.  $^1\text{H}$  NMR ( $\text{CDCl}_3$ ):  $\delta$  8.05–8.35 (m, 8H), 8.45 (d,  $J = 9.3$  Hz, 1H).  $^{13}\text{C}$  NMR ( $\text{CDCl}_3$ ):  $\delta$  105.2, 118.7, 123.0, 123.4, 123.5, 124.0, 126.5, 126.70, 126.73, 126.8, 129.1, 130.0, 130.1, 130.5, 134.5, 133.7.

**1-Tosyl-1H-pyrrole-2-carbonitrile (6a)** [CAS 220105-73-7]

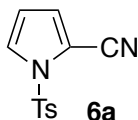

A white solid (78.3 mg, 0.32 mmol, 80% yield). Mp 116–117 °C.  $^1\text{H}$  NMR ( $\text{CDCl}_3$ ):  $\delta$  2.44 (s, 3H), 6.32 (t,  $J = 3.4$  Hz, 1H), 6.96 (dd,  $J = 3.9, 2.0$  Hz, 1H), 7.37 (d,  $J = 7.8$  Hz, 2H), 7.48 (dd,  $J = 2.9, 1.5$  Hz, 1H), 7.93 (d,  $J = 8.8$  Hz, 2H).  $^{13}\text{C}$  NMR ( $\text{CDCl}_3$ ):  $\delta$  21.7, 103.7, 111.6, 112.3, 126.5, 126.6, 127.8, 130.3, 134.1, 149.5.

**1-Phenyl-1H-pyrrole-2-carbonitrile (6b)** [CAS 35524-46-0]

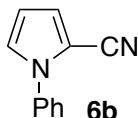

A pale yellow oil (48.0 mg, 0.29 mmol, 73% yield). Mp 59–61 °C.  $^1\text{H}$  NMR ( $\text{CDCl}_3$ ):  $\delta$  6.34 (br s, 1H), 6.99 (br s, 1H), 7.08 (br s, 1H), 7.35–7.55 (m, 5H).  $^{13}\text{C}$  NMR ( $\text{CDCl}_3$ ):  $\delta$  104.0, 110.6, 113.8, 122.2, 124.1, 126.9, 128.3, 129.6, 138.2.

**5-Phenyl-2-thiophenecarbonitrile (6c)** [CAS 215361-51-6]

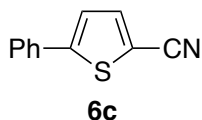

A pale yellow solid (61.8 mg, 0.33 mmol, 83% yield). Mp 86–87 °C. <sup>1</sup>H NMR (CDCl<sub>3</sub>): δ 7.27 (d, *J* = 3.9 Hz, 1H), 7.33–7.46 (m, 3H), 7.55–7.68 (m, 3H). <sup>13</sup>C NMR (CDCl<sub>3</sub>): δ 108.3, 114.4, 123.2, 126.4, 129.3, 129.4, 132.3, 138.3, 151.8.

**2,5-Diphenyl-3-thiophenecarbonitrile (6d)** [CAS 437606-44-5]

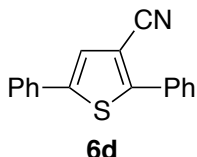

An orange solid (75.9 mg, 0.29 mmol, 73% yield). Mp 59–60 °C. <sup>1</sup>H NMR (CDCl<sub>3</sub>): δ 7.34–7.52 (m, 7H), 7.58 (d, *J* = 7.8 Hz, 2H), 7.80 (d, *J* = 7.3 Hz, 2H). <sup>13</sup>C NMR (CDCl<sub>3</sub>): δ 106.5, 115.8, 125.5, 125.8, 127.5, 128.8, 129.18, 129.20, 129.7, 131.3, 132.2, 144.1, 152.4.

**5-Phenyl-2-furancarbonitrile (6e)** [CAS 57666-50-9]

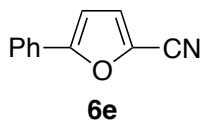

A brown solid (33.1 mg, 0.20 mmol, 50% yield). Mp 70–71 °C. <sup>1</sup>H NMR (CDCl<sub>3</sub>): δ 6.73 (d, *J* = 3.9 Hz, 1H), 7.17 (d, *J* = 3.9 Hz, 1H), 7.34–7.48 (m, 3H), 7.72 (d, *J* = 7.3 Hz, 2H). <sup>13</sup>C NMR (CDCl<sub>3</sub>): δ 106.0, 111.9, 124.0, 124.8, 125.1, 128.7, 129.0, 129.5, 158.6.

**2-Phenylbenzofuran-3-carbonitrile (6f)** [CAS 37883-72-0]

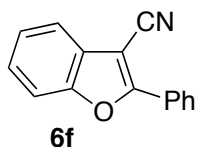

A pale yellow solid (78.7 mg, 0.36 mmol, 90% yield). Mp 73–74 °C. <sup>1</sup>H NMR (CDCl<sub>3</sub>): δ 7.35–7.47 (m, 2H), 7.50–7.62 (m, 4H), 7.72 (d, *J* = 8.3 Hz, 1H), 8.20 (d, *J* = 7.8 Hz, 2H). <sup>13</sup>C NMR (CDCl<sub>3</sub>): δ 88.0, 111.6, 114.2, 119.8, 124.6, 126.3, 126.4, 127.1, 127.7, 129.1, 131.1, 153.2, 161.5.

**9-Phenyl-9H-carbazole-2-carbonitrile (6g)** [CAS 540473-55-0]

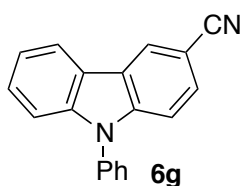

A pale yellow solid (85.8 mg, 0.32 mmol, 80% yield). Mp 172–173 °C.  $^1\text{H}$  NMR ( $\text{CDCl}_3$ ):  $\delta$  7.32–7.43 (m, 3H), 7.48 (d,  $J = 8.3$  Hz, 1H), 7.50–7.58 (m, 3H), 7.60–7.70 (m, 3H), 8.15 (d,  $J = 7.3$  Hz, 1H), 8.45 (s, 1H).  $^{13}\text{C}$  NMR ( $\text{CDCl}_3$ ):  $\delta$  102.5, 110.3, 110.4, 120.3, 120.5, 121.1, 122.1, 123.4, 125.1, 127.0, 127.3, 128.3, 129.0, 130.1, 136.3, 141.5, 142.4.

### 1-Tosyl-1H-indole-3-carbonitrile (**6h**) [CAS 859205-33-7]

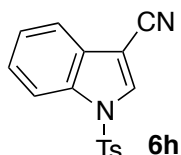

A white solid (46.5 mg, 0.16 mmol, 40% yield). Mp 157–158 °C.  $^1\text{H}$  NMR ( $\text{CDCl}_3$ ):  $\delta$  2.38 (s, 1H), 7.30 (d,  $J = 8.3$  Hz, 2H), 7.38 (t,  $J = 7.3$  Hz, 1H), 7.44 (t,  $J = 7.3$  Hz, 1H), 7.69 (d,  $J = 7.8$  Hz, 1H), 7.83 (d,  $J = 8.3$  Hz, 2H), 8.00 (d,  $J = 8.3$  Hz, 1H), 8.10 (s, 1H).  $^{13}\text{C}$  NMR ( $\text{CDCl}_3$ ):  $\delta$  21.7, 93.7, 113.4, 113.8, 120.3, 124.8, 126.5, 127.2, 128.3, 130.4, 133.1, 133.6, 134.1, 146.3.

### 3. Tandem cyanation-demethylation reaction (eq. 1)

#### 2-(2-Methoxyphenyl)benzofuran-3-carbonitrile (**8**)

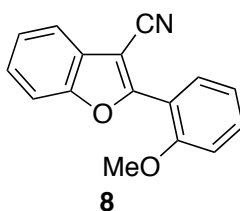

A white solid (54.7 mg, 0.22 mmol, 55% yield). Mp 104–105 °C. IR (KBr): 2224, 1498, 1294, 1024, 734  $\text{cm}^{-1}$ .  $^1\text{H}$  NMR ( $\text{CDCl}_3$ ):  $\delta$  4.03 (s, 3H), 7.07 (d,  $J = 8.8$  Hz, 1H), 7.10 (t,  $J = 7.3$  Hz, 1H), 7.35–7.43 (m, 2H), 7.50 (t,  $J = 8.0$  Hz, 1H), 7.57 (d,  $J = 6.8$  Hz, 1H), 7.75 (d,  $J = 7.3$  Hz, 1H), 7.86 (d,  $J = 7.8$  Hz, 1H).  $^{13}\text{C}$  NMR ( $\text{CDCl}_3$ ):  $\delta$  54.7, 92.0, 111.45, 111.47, 113.8, 117.2, 119.9, 120.7, 124.3, 126.0, 128.0, 129.6, 132.5, 153.1, 157.4, 158.5. HRMS (FAB) calcd for  $\text{C}_{16}\text{H}_{11}\text{NO}_2$  ( $\text{M}^+$ ) 249.0790, found 249.0791.

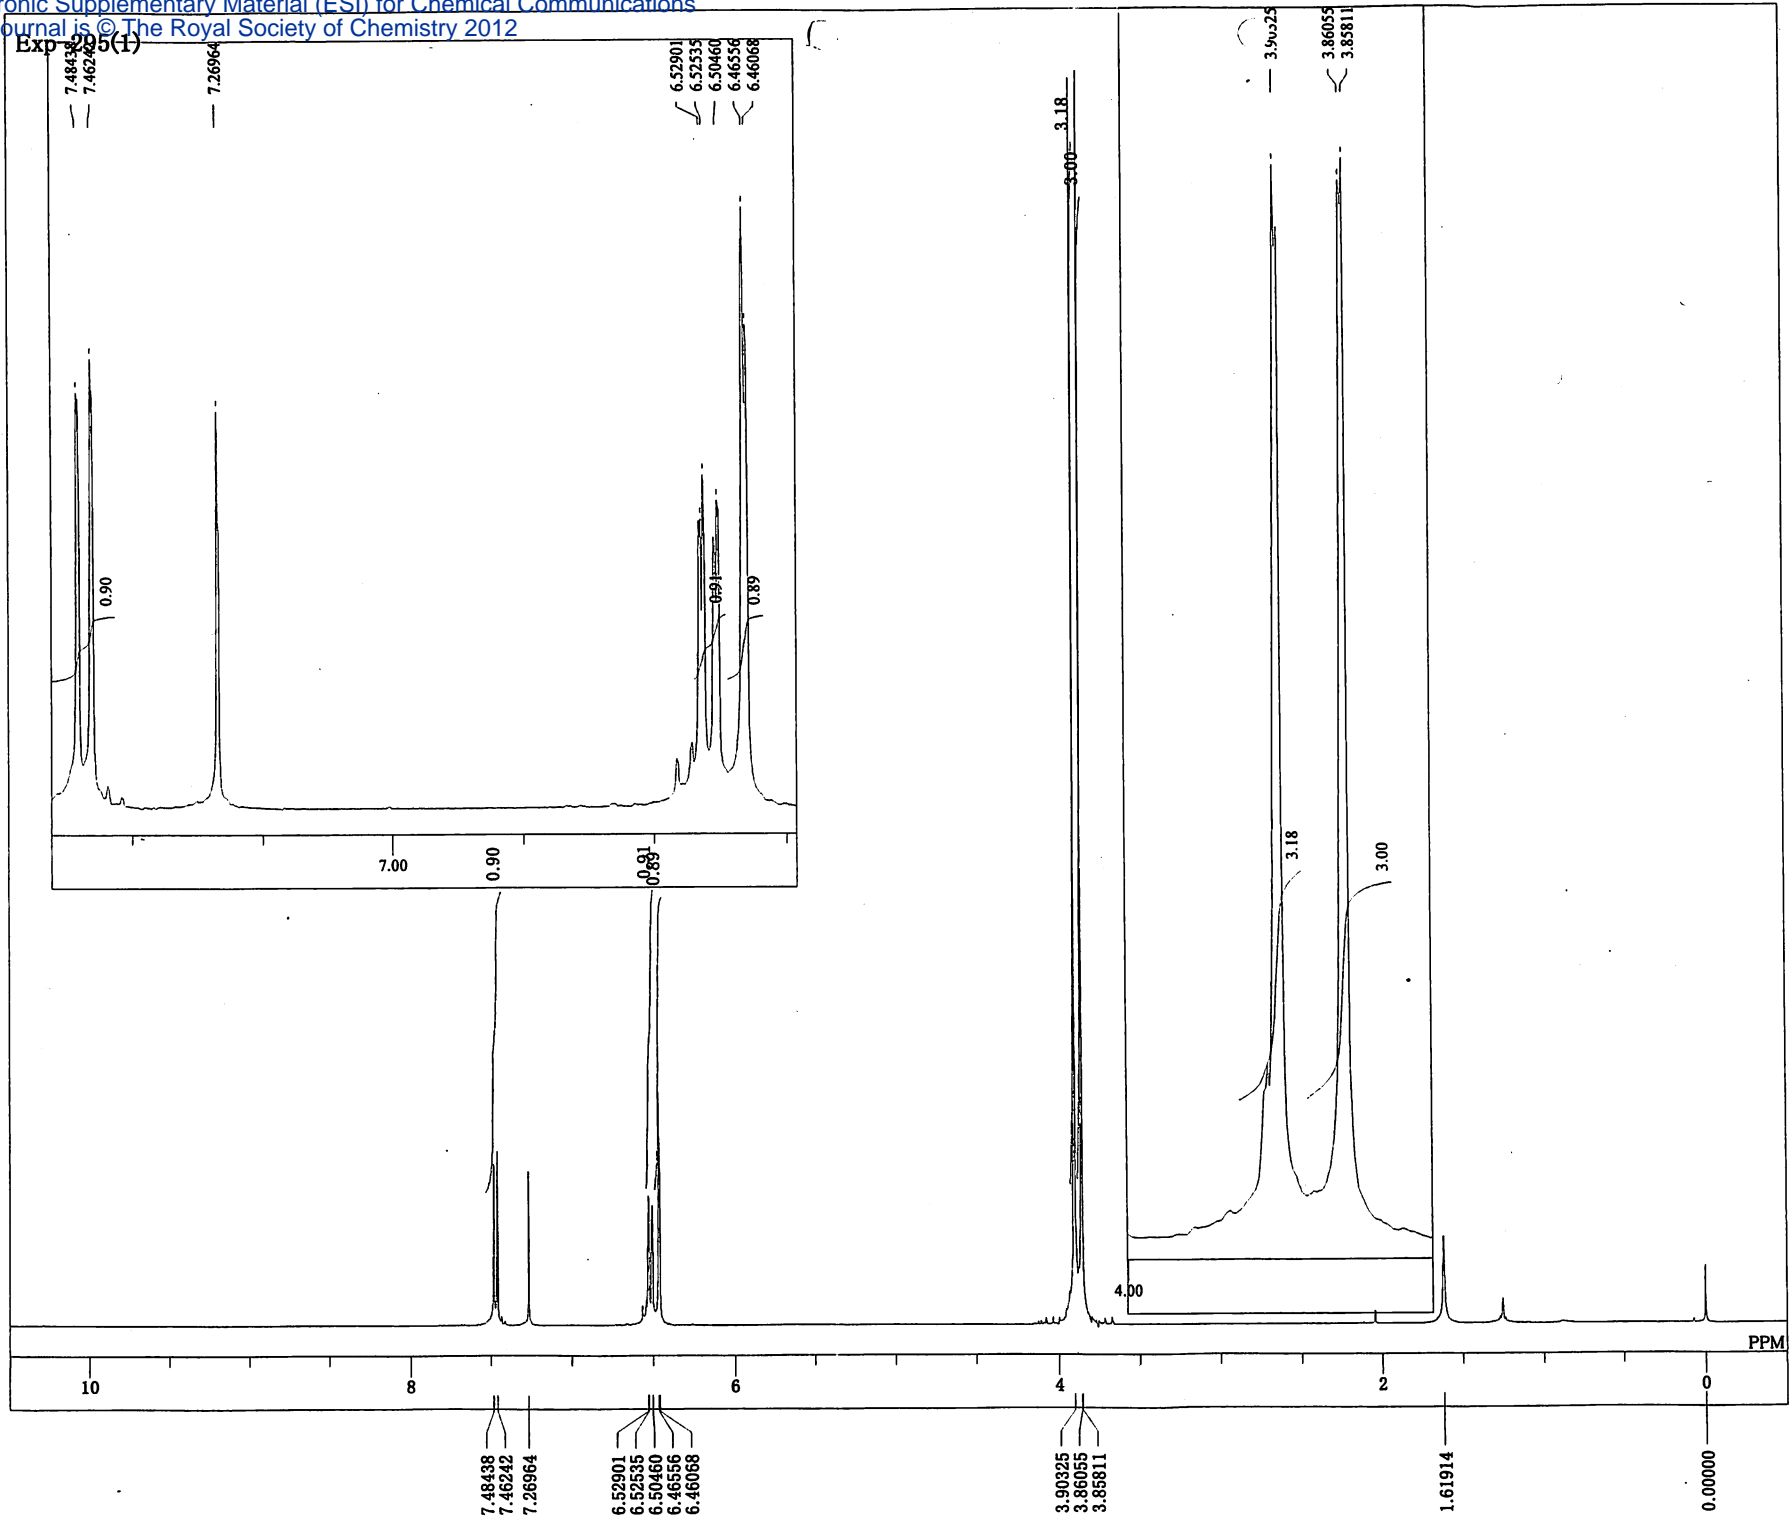

DFILE \_DEFAULT.ALS  
COMNT Exp-295(1)  
DATIM Mon Aug 08 15:53:24 2011  
OBNUC 1H  
EXMOD NON  
OBFRQ 399.65 MHz  
OBSET 124.00 KHz  
OBFIN 10500.00 Hz  
POINT 16384  
FREQU 7992.01 Hz  
SCANS 16  
ACQTM 2.0501 sec  
PD 2.9500 sec  
PW1 7.20 usec  
IRNUC 1H  
CTEMP 28.3 c  
SLVNT CDCL3  
EXREF 0.00 ppm  
BF 0.10 Hz  
RGAIN 17

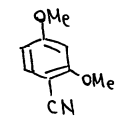



Exp-295(1)-13C

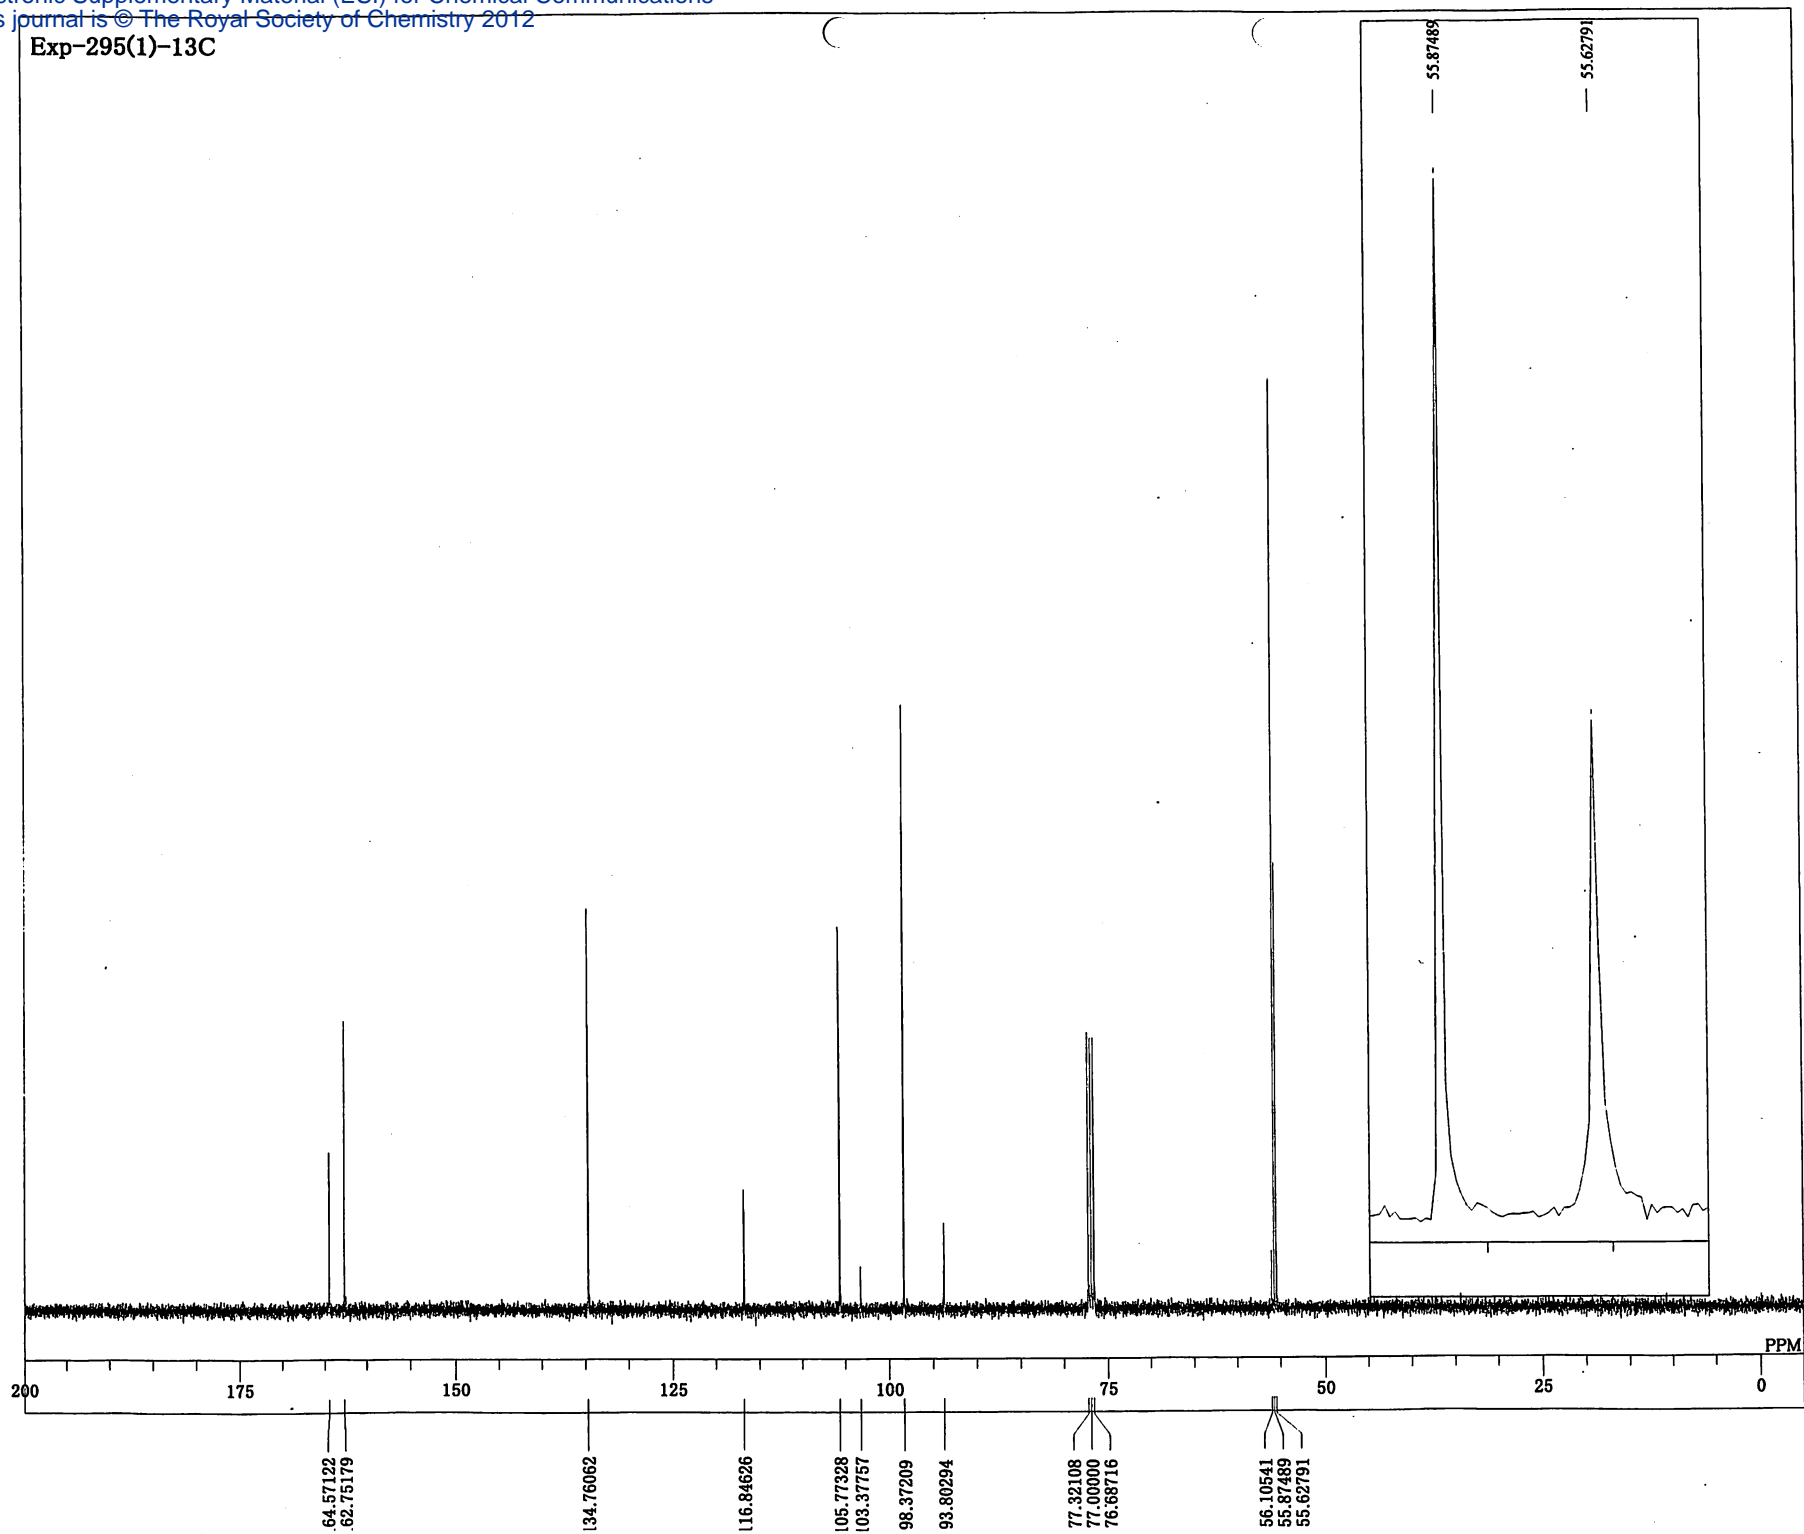

DFILE Exp-295(1)-13C.als  
COMNT Exp-295(1)-13C  
DATIM Thu Sep 22 15:50:27 2011  
OBNUC 13C  
EXMOD BCM  
OBFRQ 100.40 MHz  
OBSET 125.00 KHz  
OBFIN 10500.00 Hz  
POINT 32768  
FREQU 27118.64 Hz  
SCANS 256  
ACQTM 1.2083 sec  
PD 1.7920 sec  
PW1 4.50 usec  
IRNUC 1H  
CTEMP 28.3 c  
SLVNT CDCL3  
EXREF 77.00 ppm  
BF 0.10 Hz  
RGAIN 29

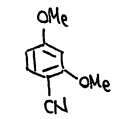

64.57122  
62.75179

134.76062

116.84626

105.77328  
103.37757

98.37209  
93.80294

77.32108  
77.00000  
76.58716

56.10541  
55.87489  
55.62791

PPM

Exp-323(1)

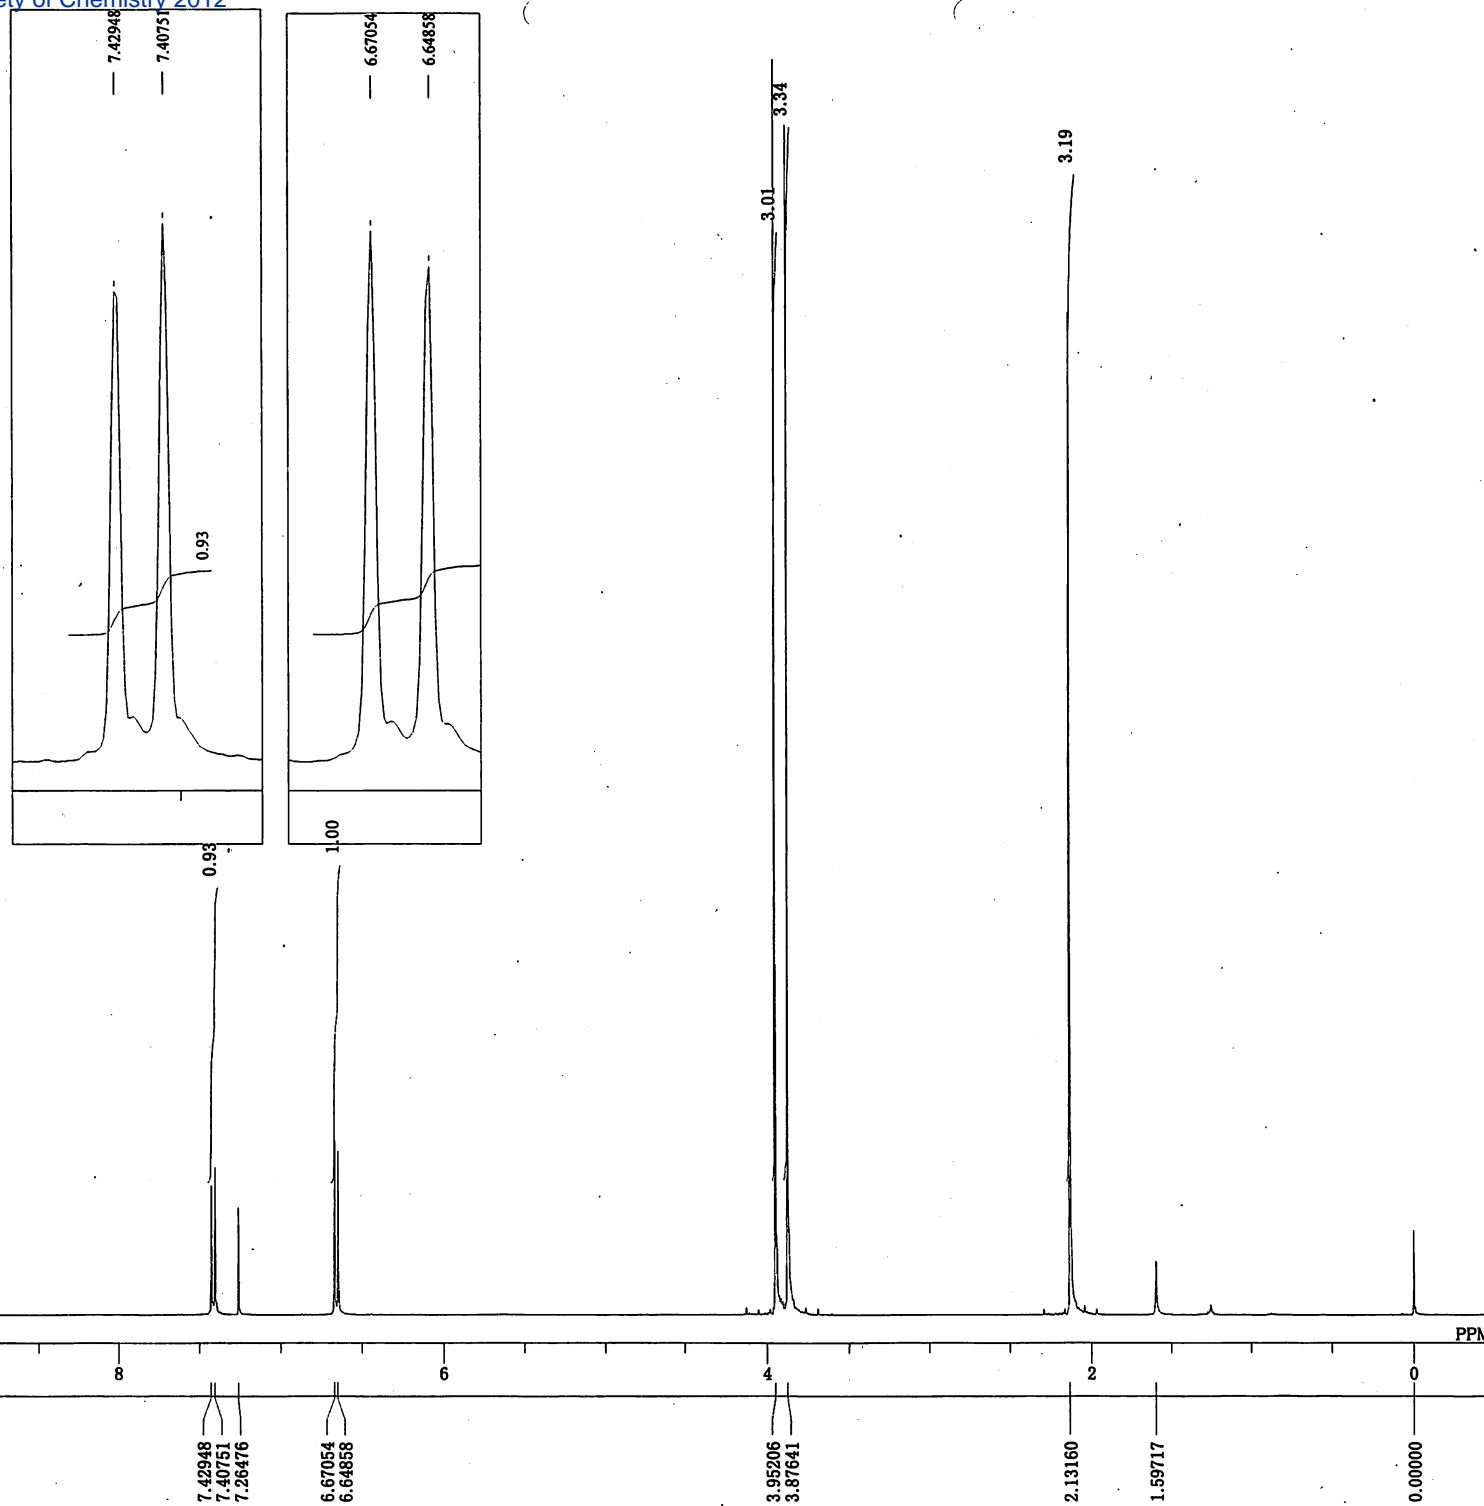

DEFAULT.ALS  
Exp-323(1)  
Tue Aug 30 20:39:52 2011  
1H  
NON  
OBFRQ 399.65 MHz  
OBSET 124.00 KHz  
OBFIN 10500.00 Hz  
POINT 16384  
FREQU 7992.01 Hz  
SCANS 16  
ACQTM 2.0501 sec  
PD 2.9500 sec  
PW1 7.20 usec  
IRNUC 1H  
CTEMP 29.1 c  
SLVNT CDCL3  
EXREF 0.00 ppm  
BF 0.10 Hz  
RGAIN 16

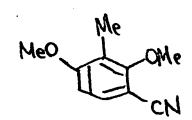

Exp-323(1)-13C

DFILE \_DEFAULT.ALS  
COMNT Exp-323(1)-13C  
DATIM Tue Aug 30 20:57:27 2011  
OBNUC 13C  
EXMOD BCM  
OBFRQ 100.40 MHz  
OBSET 125.00 KHz  
OBFIN 10500.00 Hz  
POINT 32768  
FREQU 27118.64 Hz  
SCANS 256  
ACQTM 1.2083 sec  
PD 1.7920 sec  
PW1 4.50 usec  
IRNUC 1H  
CTEMP 28.7 c  
SLVNT CDCL3  
EXREF 77.00 ppm  
BF 0.10 Hz  
RGAIN 31

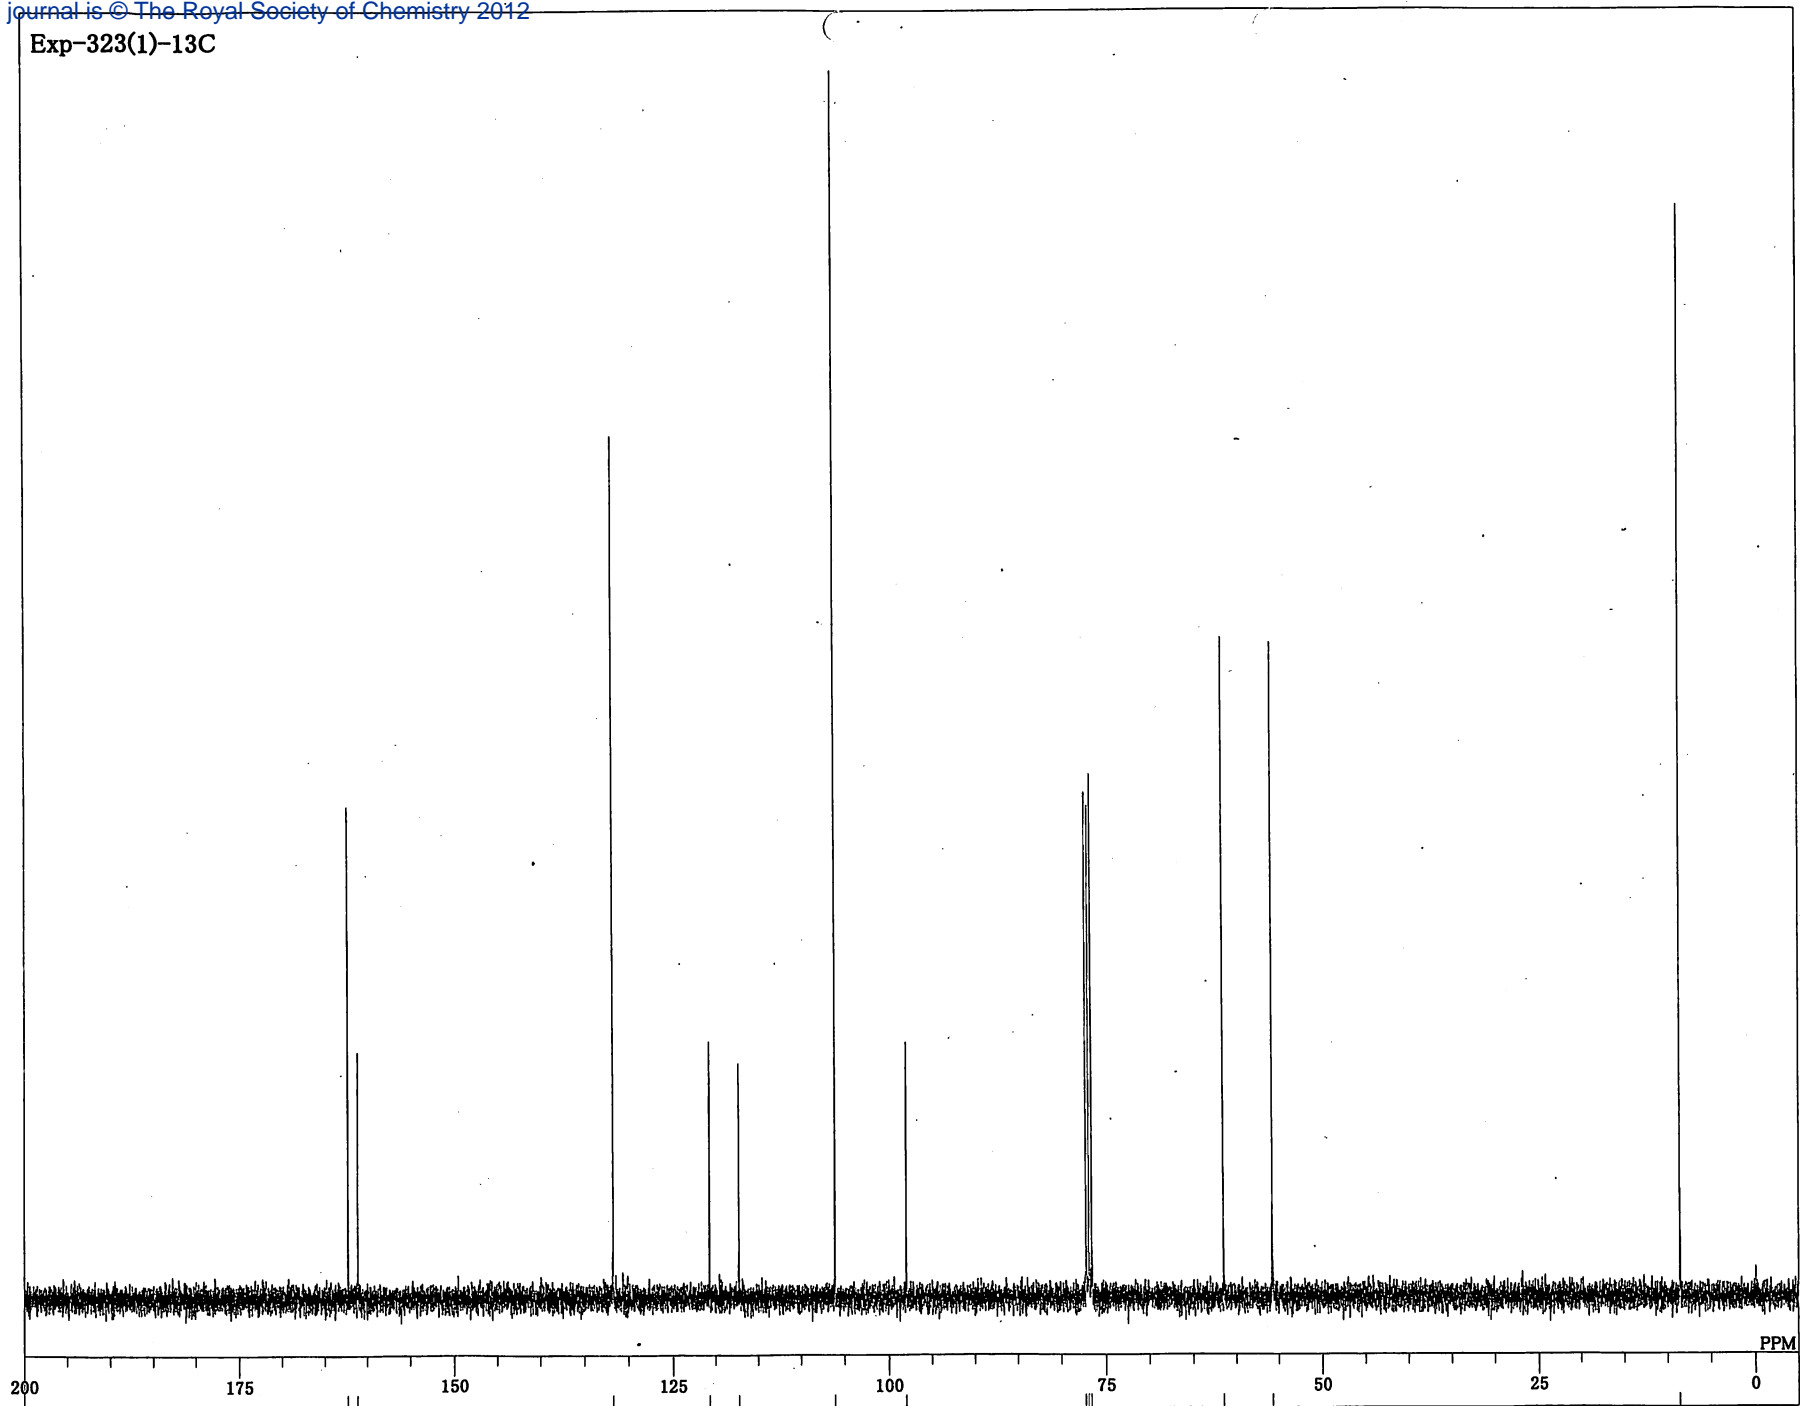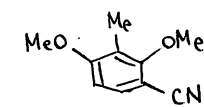

Exp-404(3)

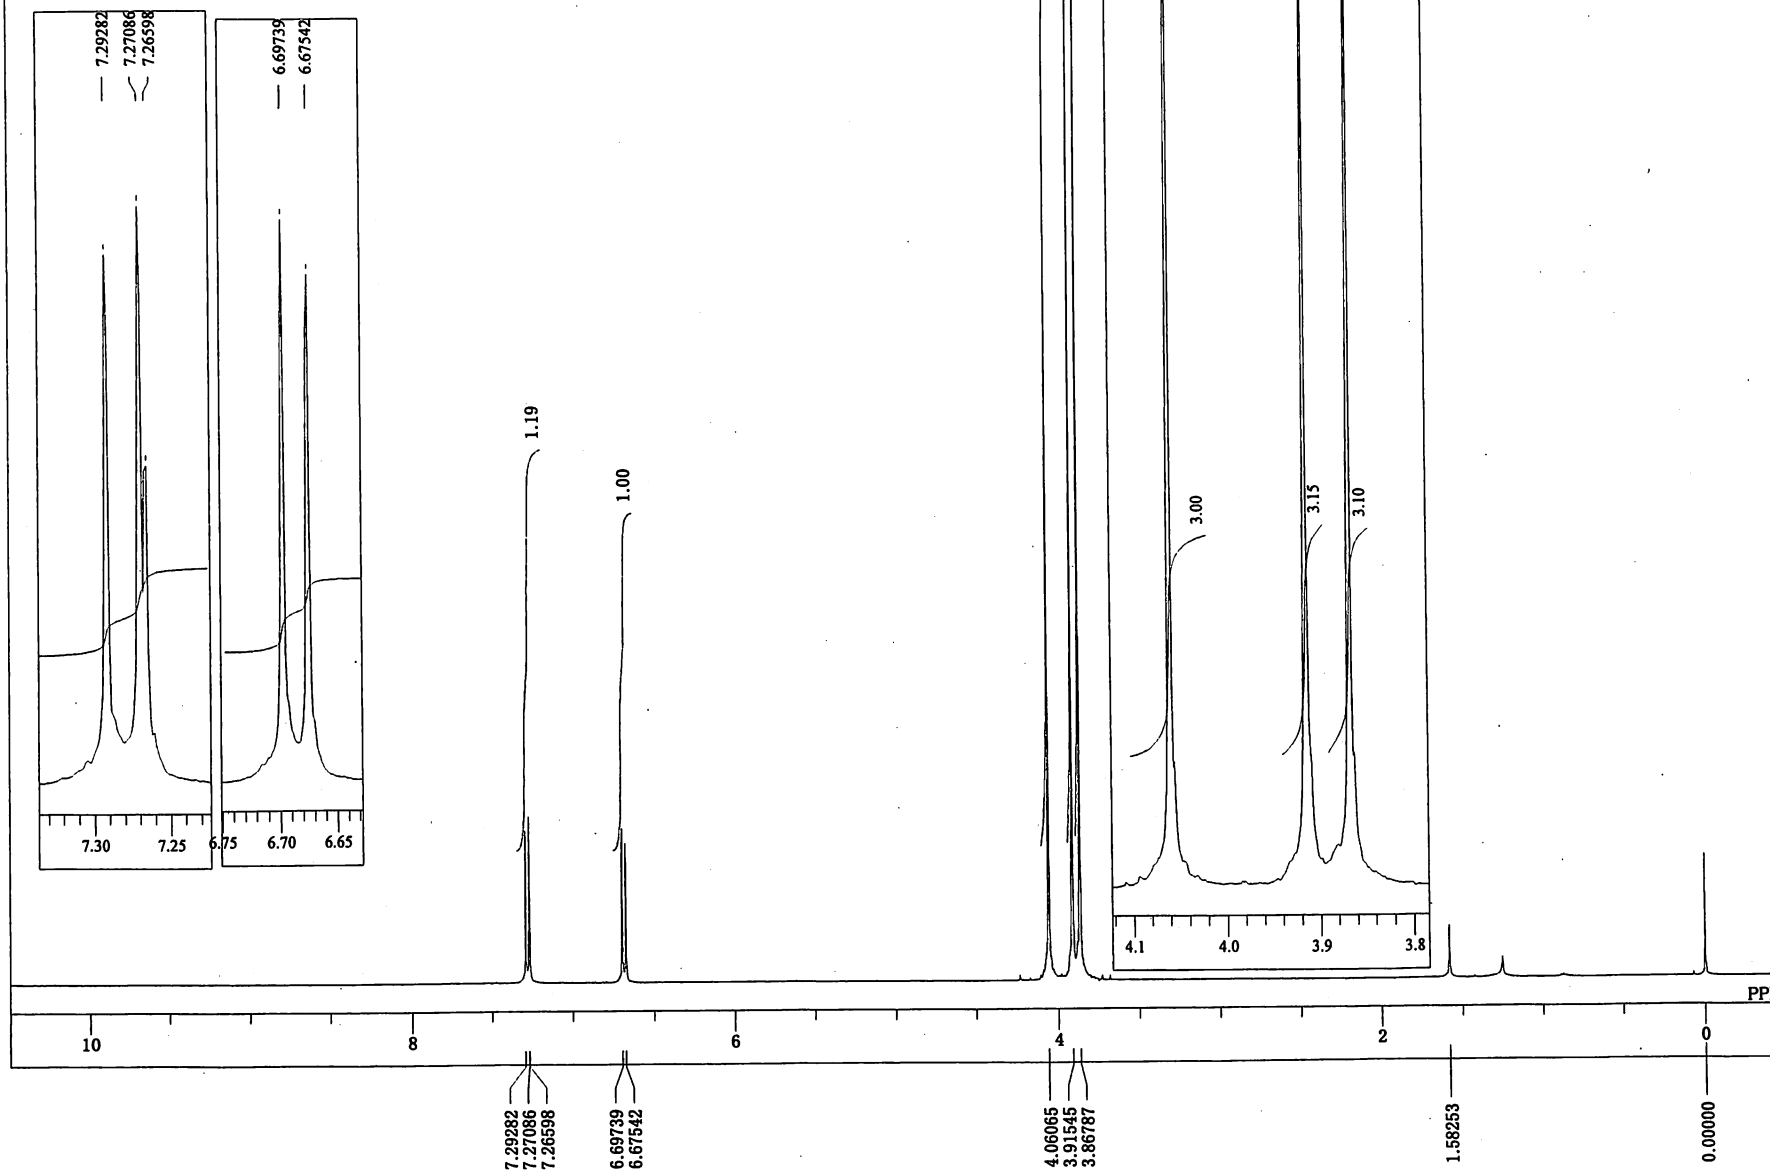

DFILE \_DEFAULT.ALS  
COMT Exp-404(3)  
DATIM Wed Nov 09 18:05:04 2011  
OBNUC 1H  
EXMOD NON  
OBFRQ 399.65 MHz  
OBSET 124.00 KHz  
OBFIN 10500.00 Hz  
POINT 16384  
FREQU 7992.01 Hz  
SCANS 16  
ACQTM 2.0501 sec  
PD 2.9500 sec  
PW1 7.20 usec  
IRNUC 1H  
CTEMP 29.1 c  
SLVNT CDCL3  
EXREF 0.00 ppm  
BF 0.12 Hz  
RGAIN 17

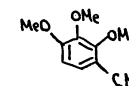

Exp-404(3)-13C

DFILE \_DEFAULT.ALS  
COMNT Exp-404(3)-13C  
DATIM Wed Nov 09 20:56:05 2011  
OBNUC 13C  
EXMOD BCM  
OBFRQ 75.45 MHz  
OBSEF 124.00 KHz  
OBFIN 1840.00 Hz  
POINT 32768  
FREQU 20356.23 Hz  
SCANS 1024  
ACQTM 1.6097 sec  
PD 1.3900 sec  
PW1 4.50 usec  
IRNUC 1H  
CTEMP 25.3 c  
SLVNT CDCL3  
EXREF 77.00 ppm  
BF 1.00 Hz  
RGAIN 28

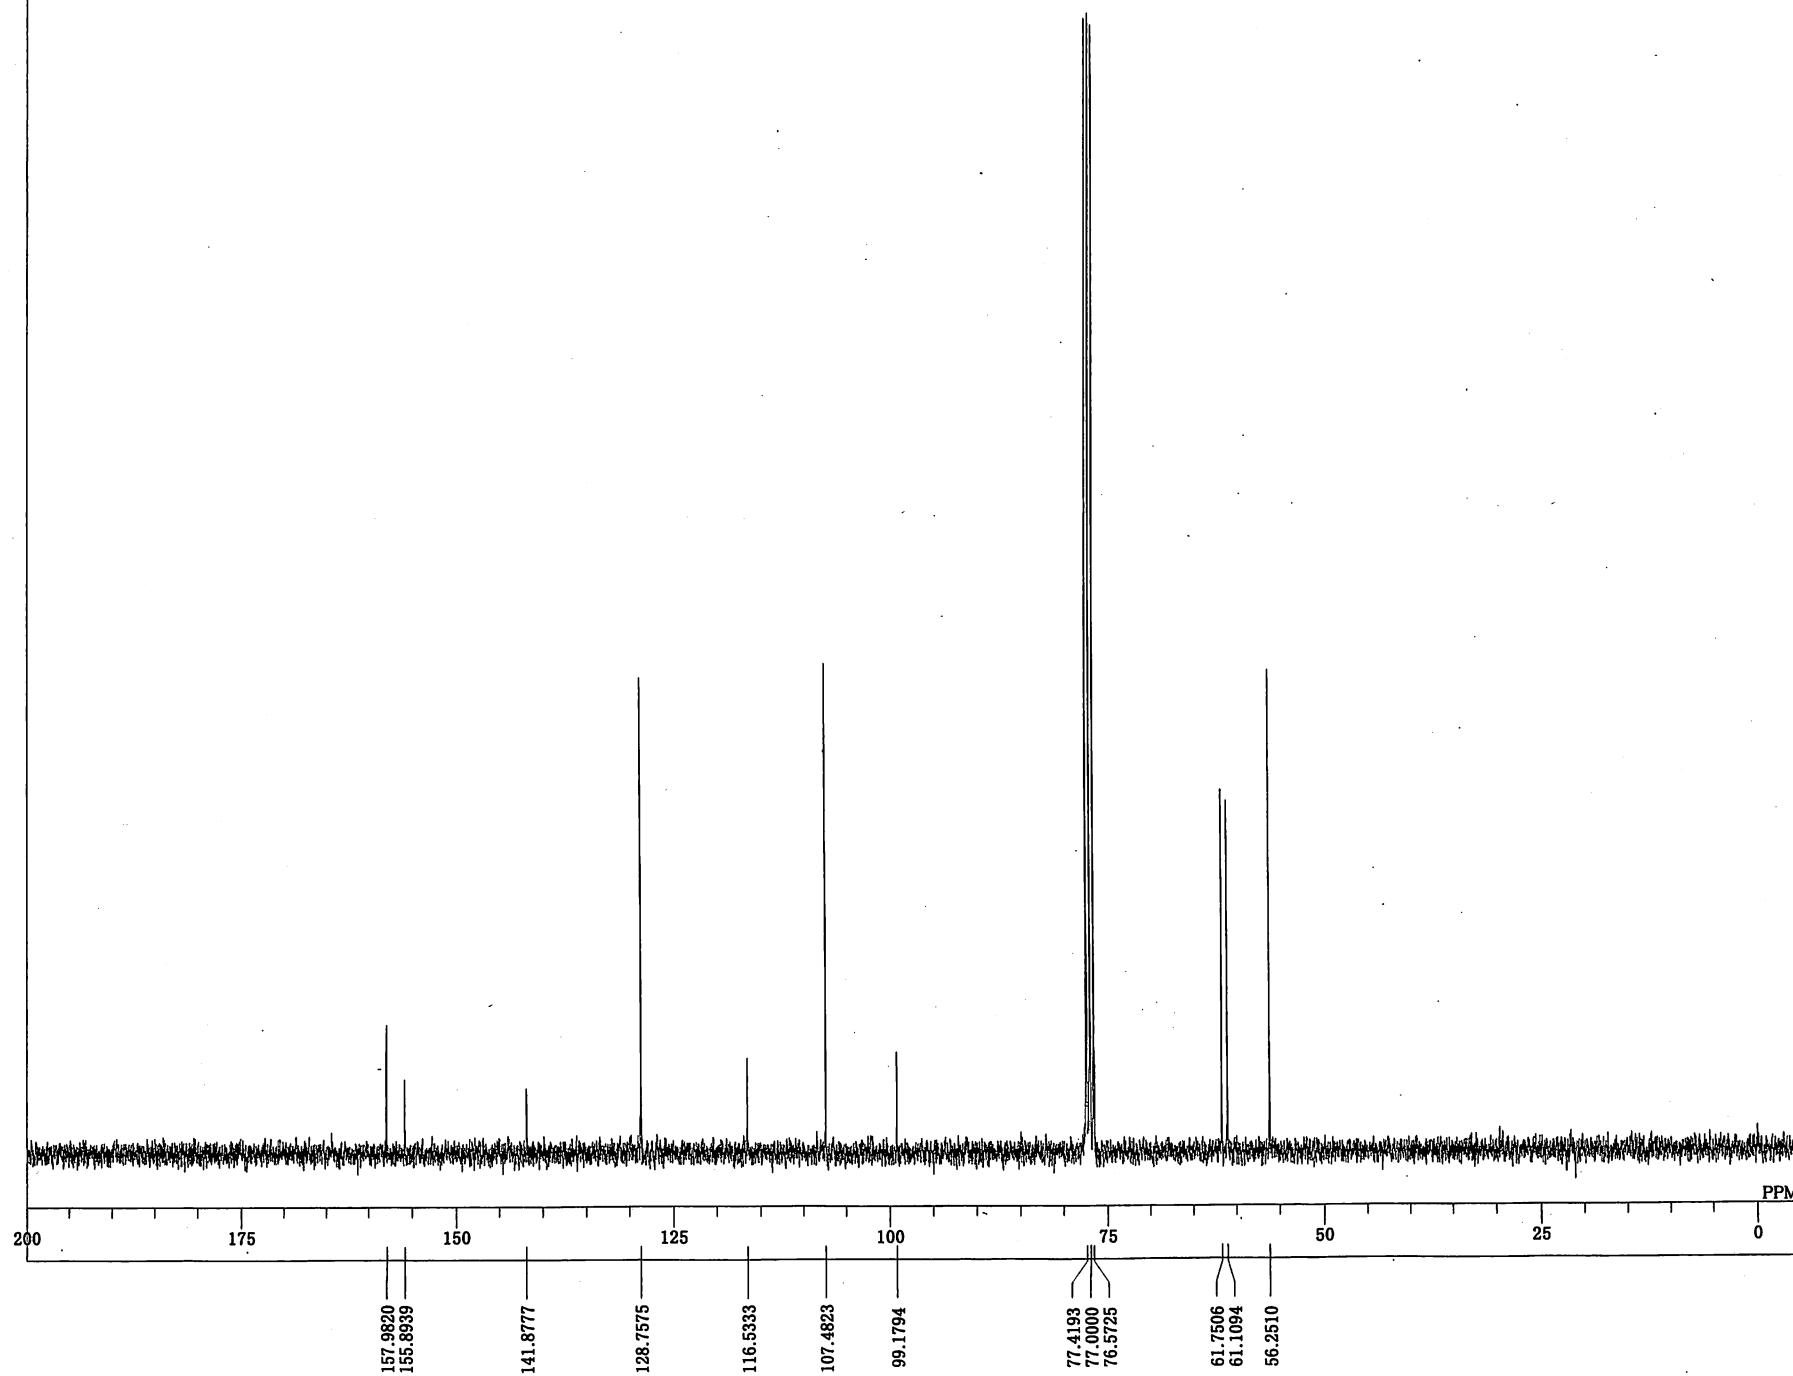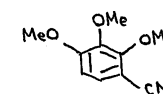

Exp-357(1)

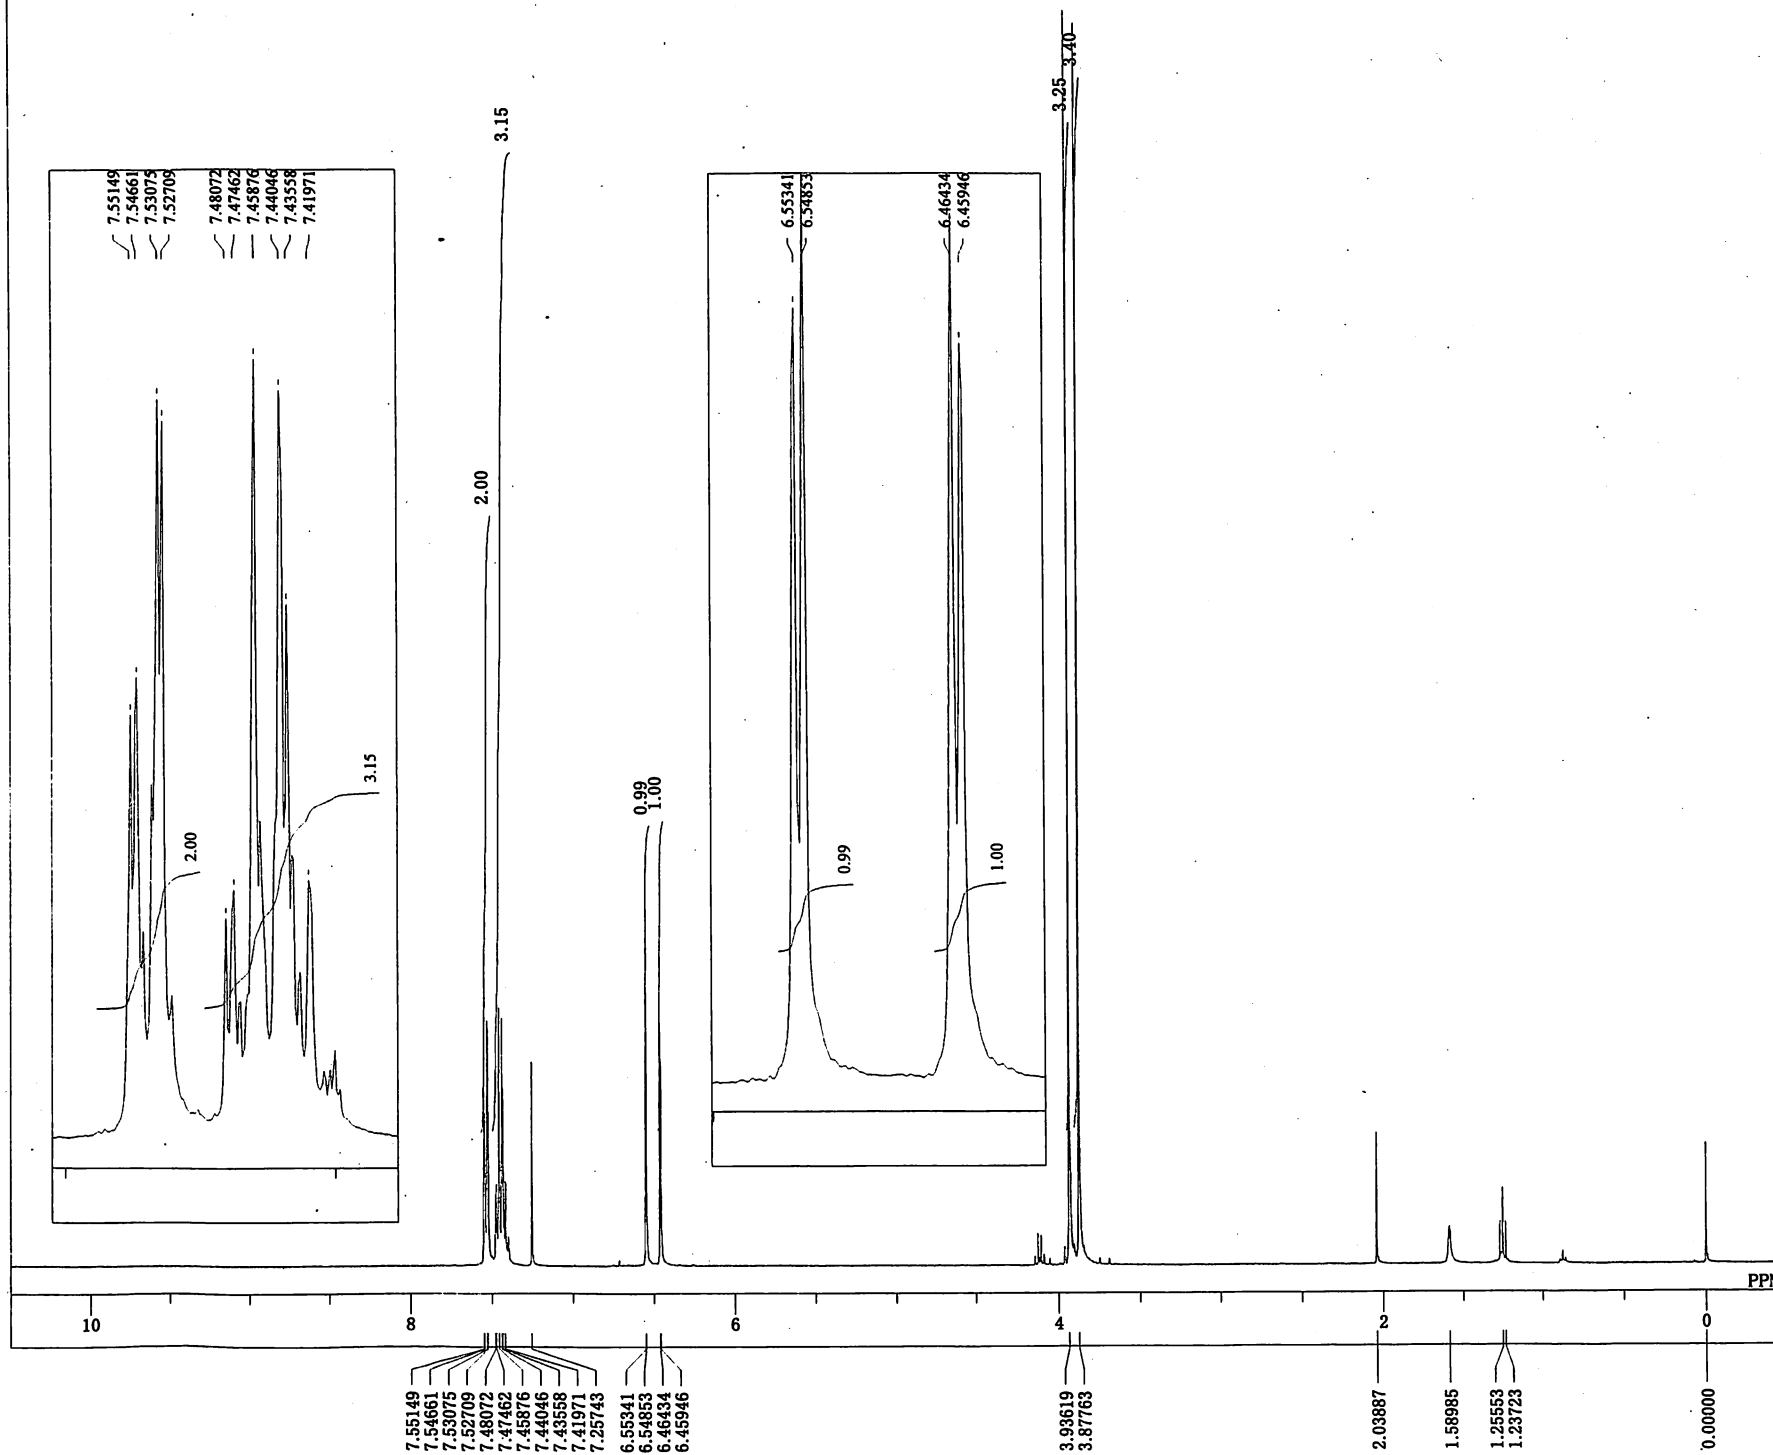

DFILE \_DEFAULT.ALS  
COMNT Exp-357(1)  
DATIM Thu Sep 29 17:35:39 2011  
OBNUC 1H  
EXMOD NON  
OBFRQ 399.65 MHz  
OBSET 124.00 KHz  
OBFIN 10500.00 Hz  
POINT 16384  
FREQU 7992.01 Hz  
SCANS 16  
ACQTM 2.0501 sec  
PD 2.9500 sec  
PW1 7.20 usec  
IRNUC 1H  
CTEMP 28.8 c  
SLVNT CDCL3  
EXREF 0.00 ppm  
BF 0.10 Hz  
RGAIN 16

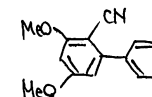

Exp-357(1)

DFILE Exp-357(1)-13C.als  
COMNT Exp-357(1)  
DATIM Wed Oct 12 12:18:54 2011  
OBNUC 13C  
EXMOD BCM  
OBFRQ 75.45 MHz  
OBSET 124.00 KHz  
OBFIN 1840.00 Hz  
POINT 32768  
FREQU 20356.23 Hz  
SCANS 1024  
ACQTM 1.6097 sec  
PD 1.3900 sec  
PW1 4.50 usec  
IRNUC 1H  
CTEMP 25.0 c  
SLVNT CDCL3  
EXREF 77.00 ppm  
BF 0.12 Hz  
RGAIN 29

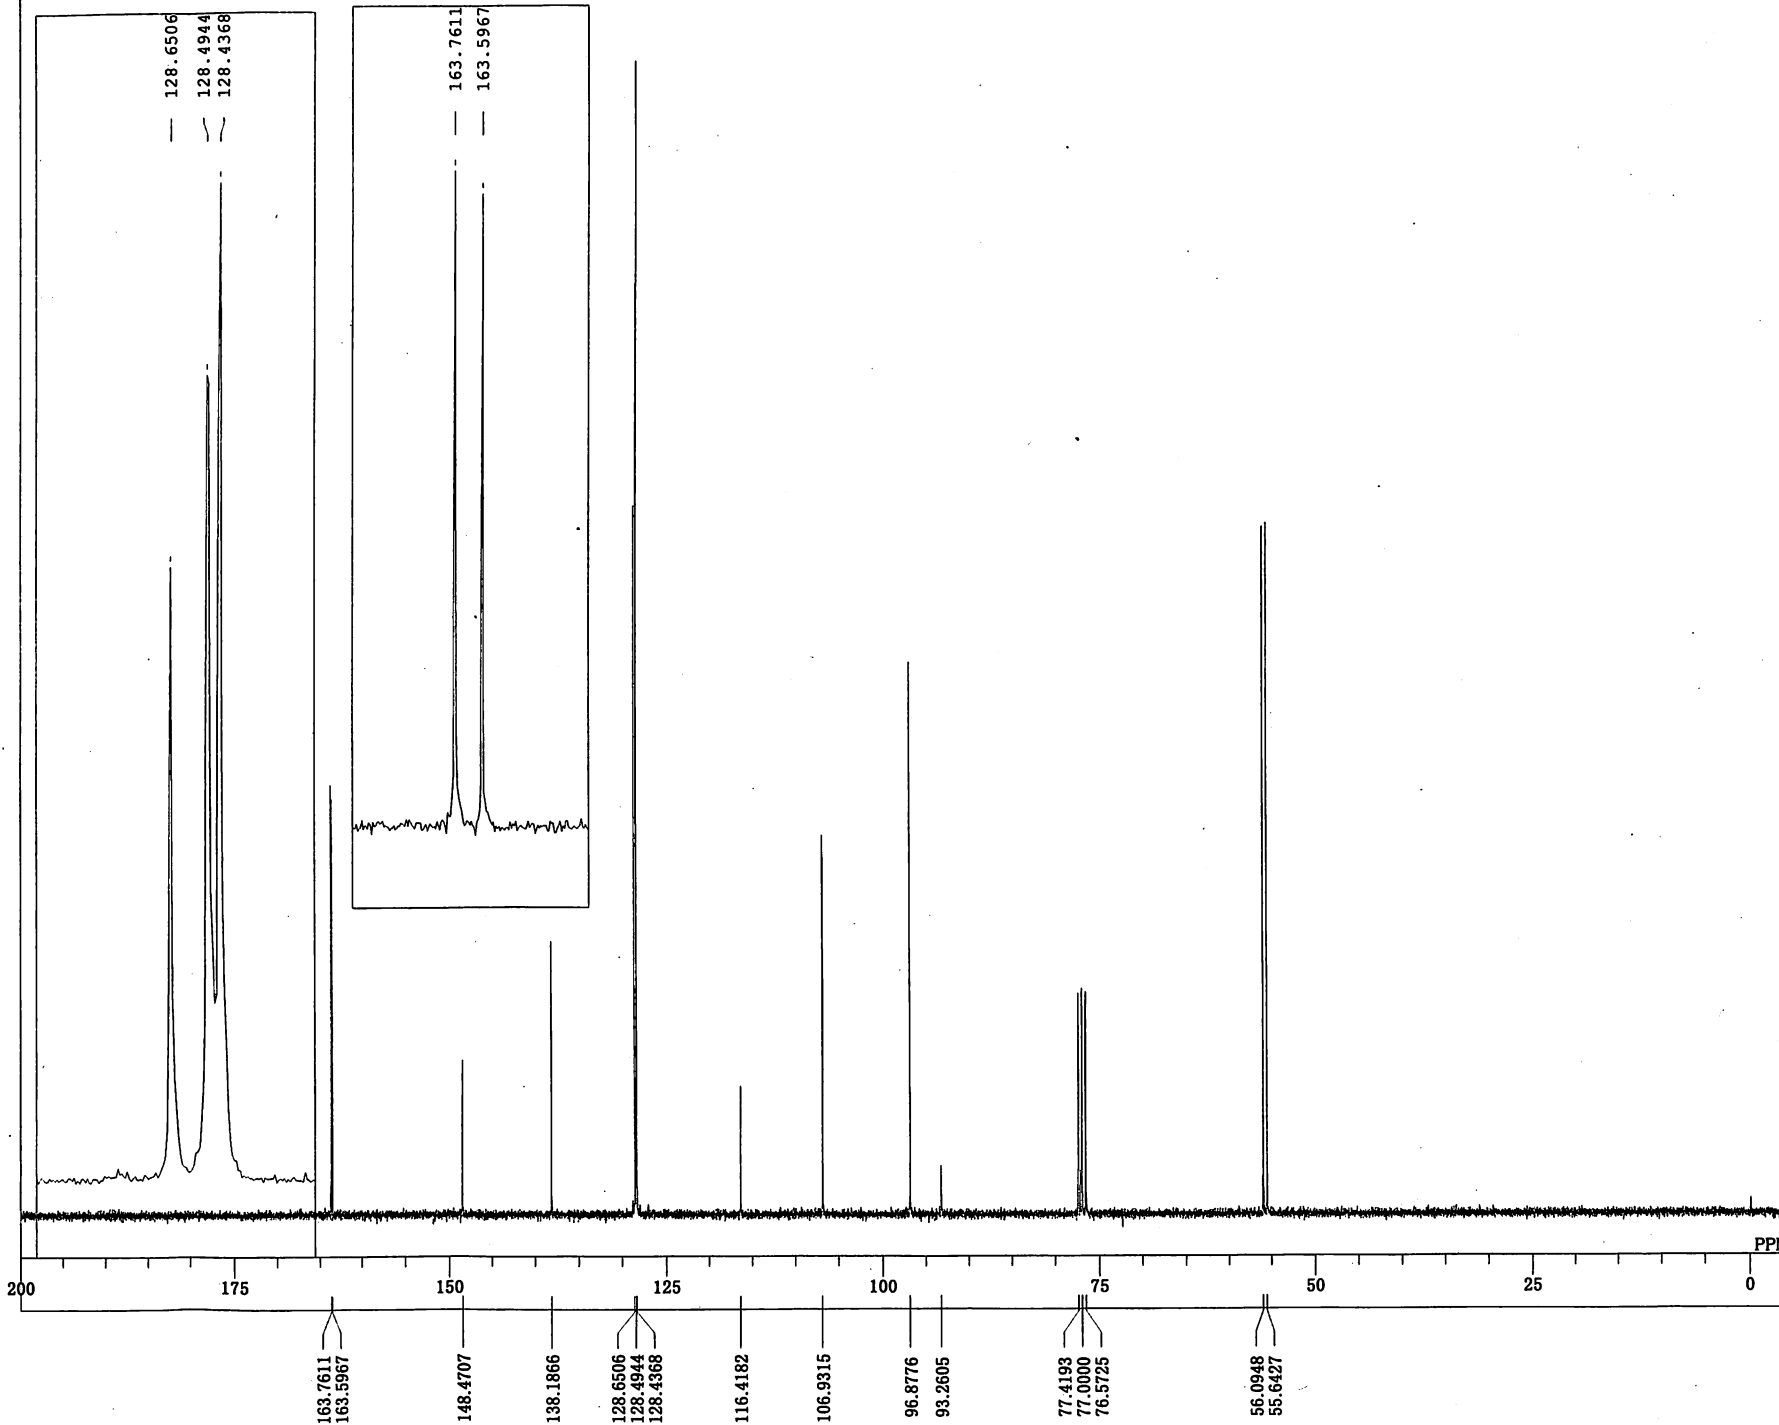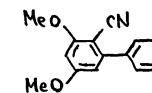

Exp-393(4)'

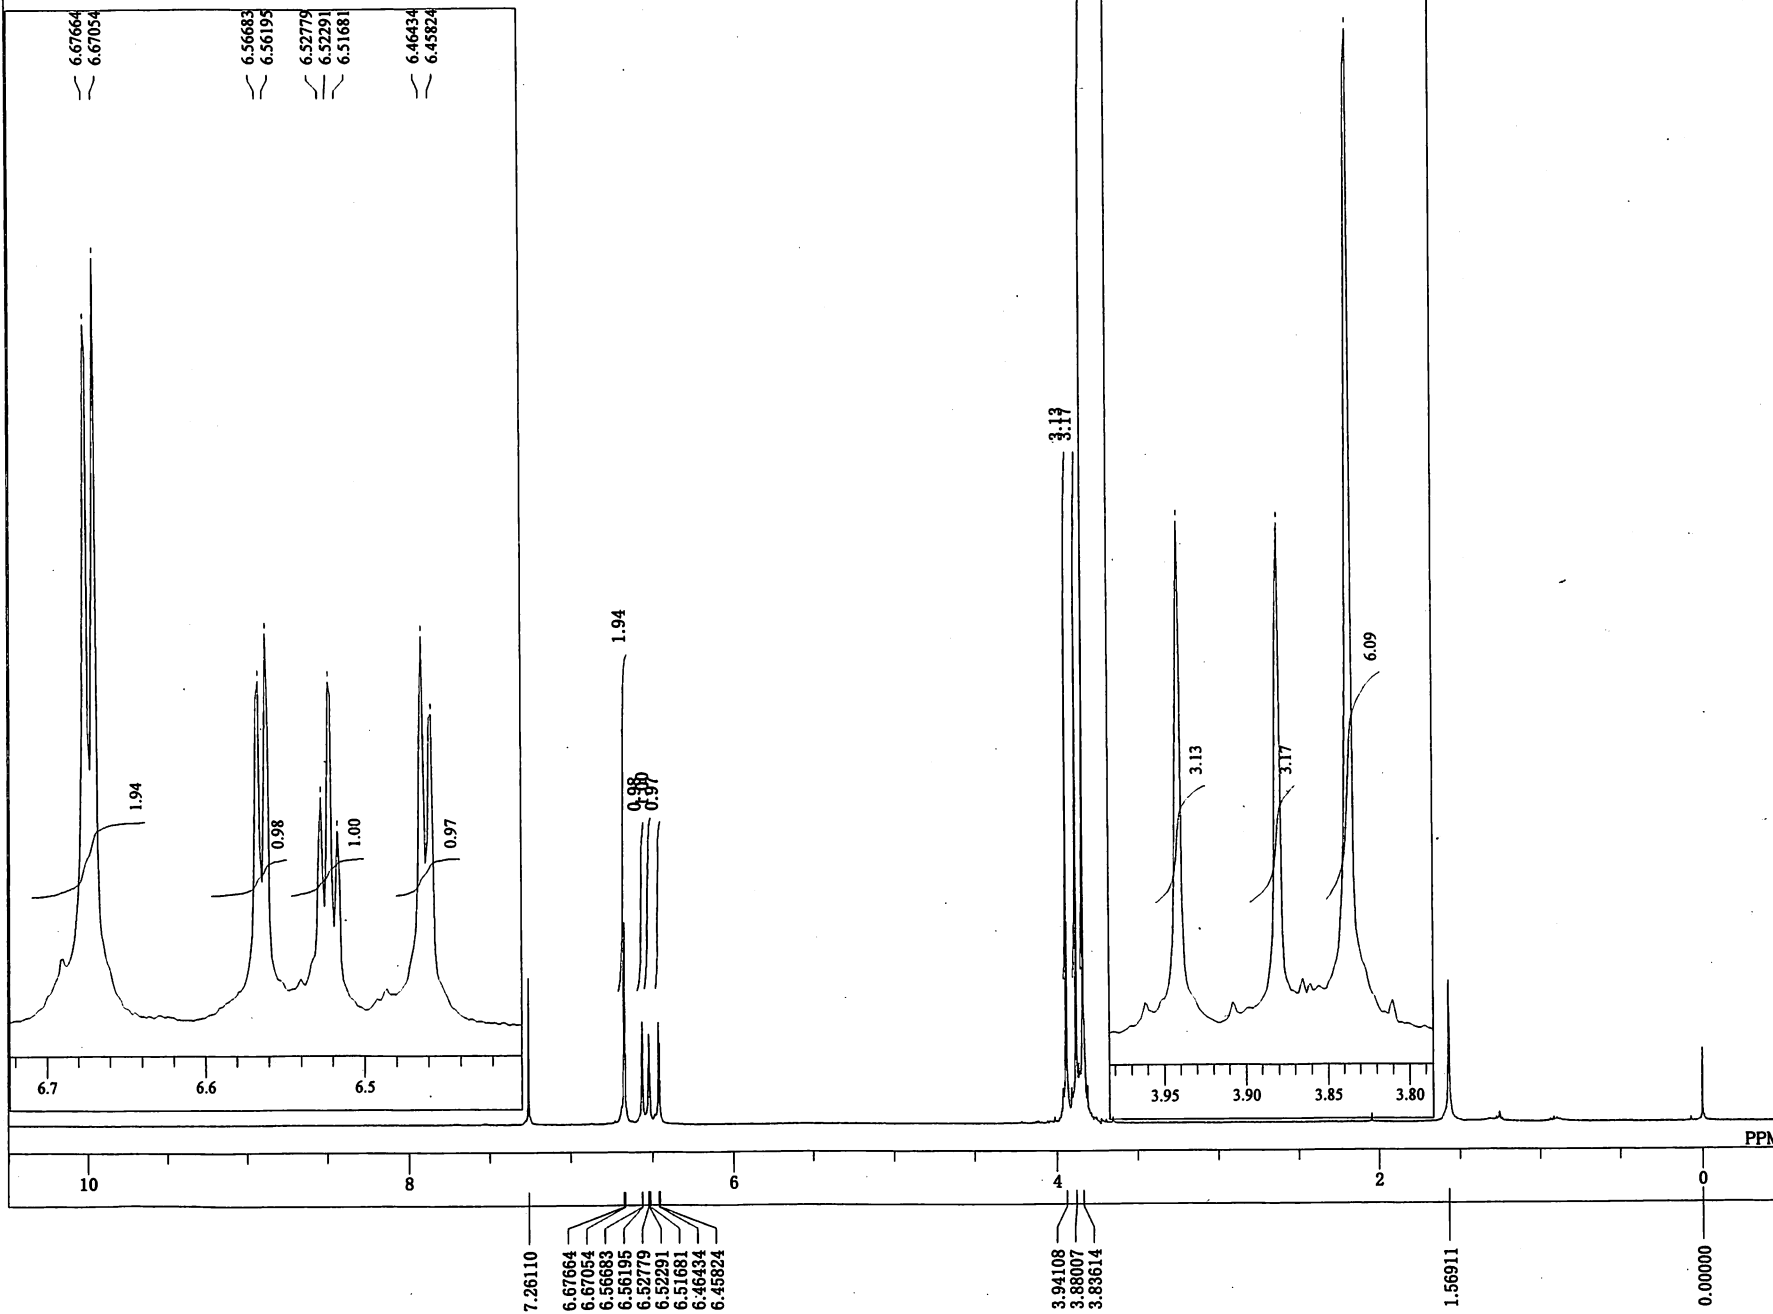

DFILE DEFAULT.ALS  
COMNT Exp-393(4)'  
DATIM Wed Nov 02 16:56:06 2011  
OBNUC 1H  
EXMOD NON  
OBFREQ 399.65 MHz  
OBSET 124.00 KHz  
OBFIN 10500.00 Hz  
POINT 16384  
FRFQU 7992.01 Hz  
SCANS 16  
ACQTM 2.0501 sec  
PD 2.9500 sec  
PW1 7.20 usec  
IRNUC 1H  
CTEMP 28.5 c  
SLVNT CDCL3  
EXREF 0.00 ppm  
BF 0.12 Hz  
RGAIN 19

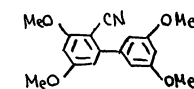



Exp-393(4)-13C

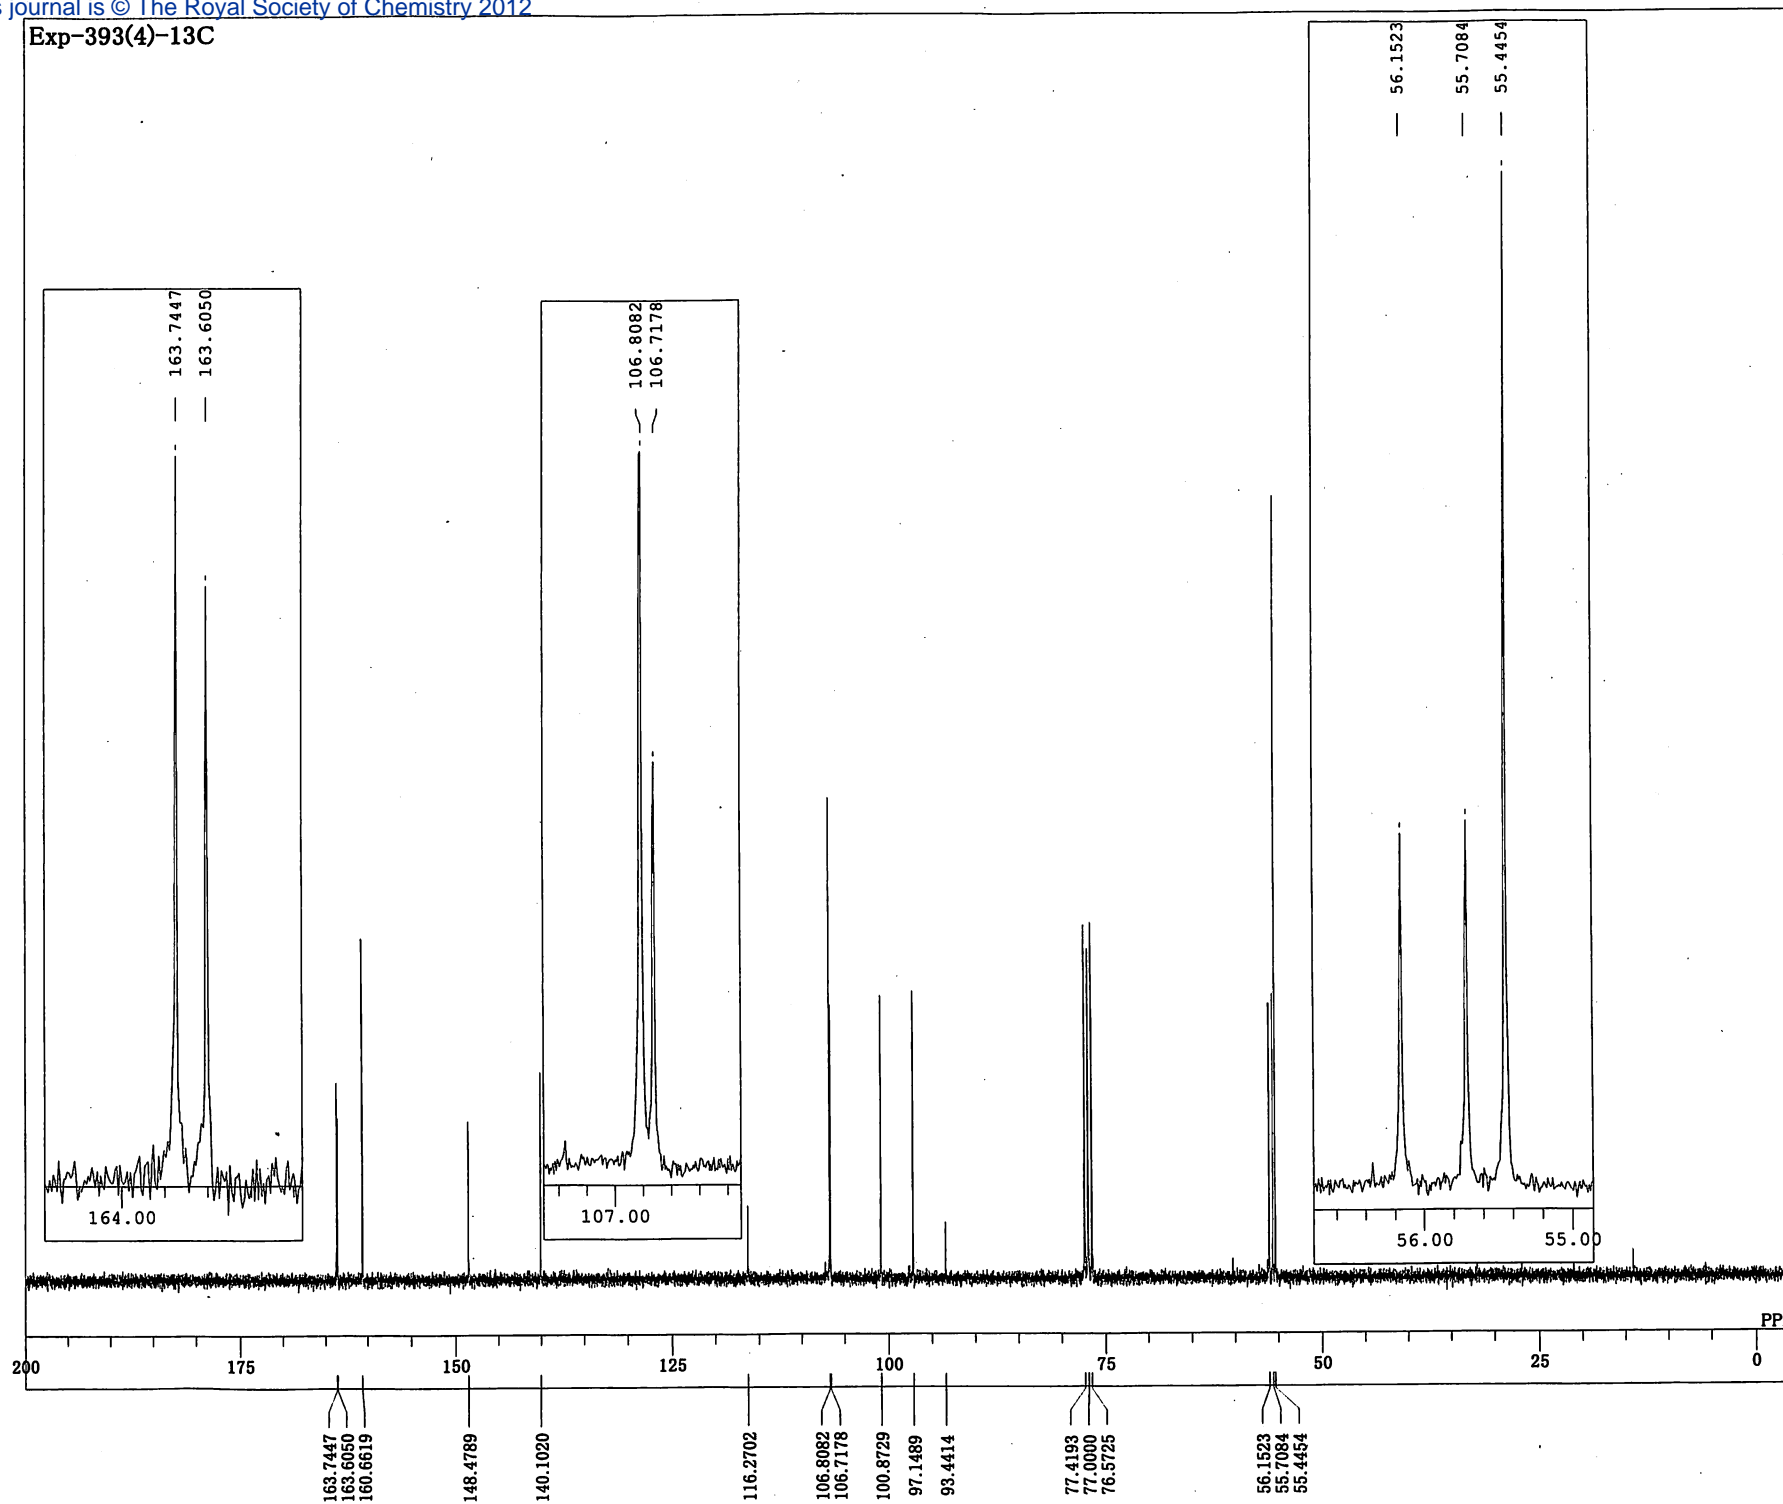

DFILE DEFAULT.ALS  
COMNT Exp-393(4)-13C  
DATIM Wed Nov 02 13:45:15 2011  
OBNUC 13C  
EXMOD BCM  
OBFRQ 75.45 MHz  
OBSET 124.00 KHz  
OBFIN 1840.00 Hz  
POINT 32768  
FREQU 20356.23 Hz  
SCANS 1024  
ACQTM 1.6097 sec  
PD 1.3900 sec  
PW1 4.50 usec  
IRNUC 1H  
CTEMP 25.2 c  
SLVNT CDCL3  
EXREF 77.00 ppm  
BF 0.12 Hz  
RGAIN 28

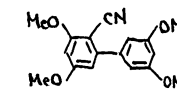

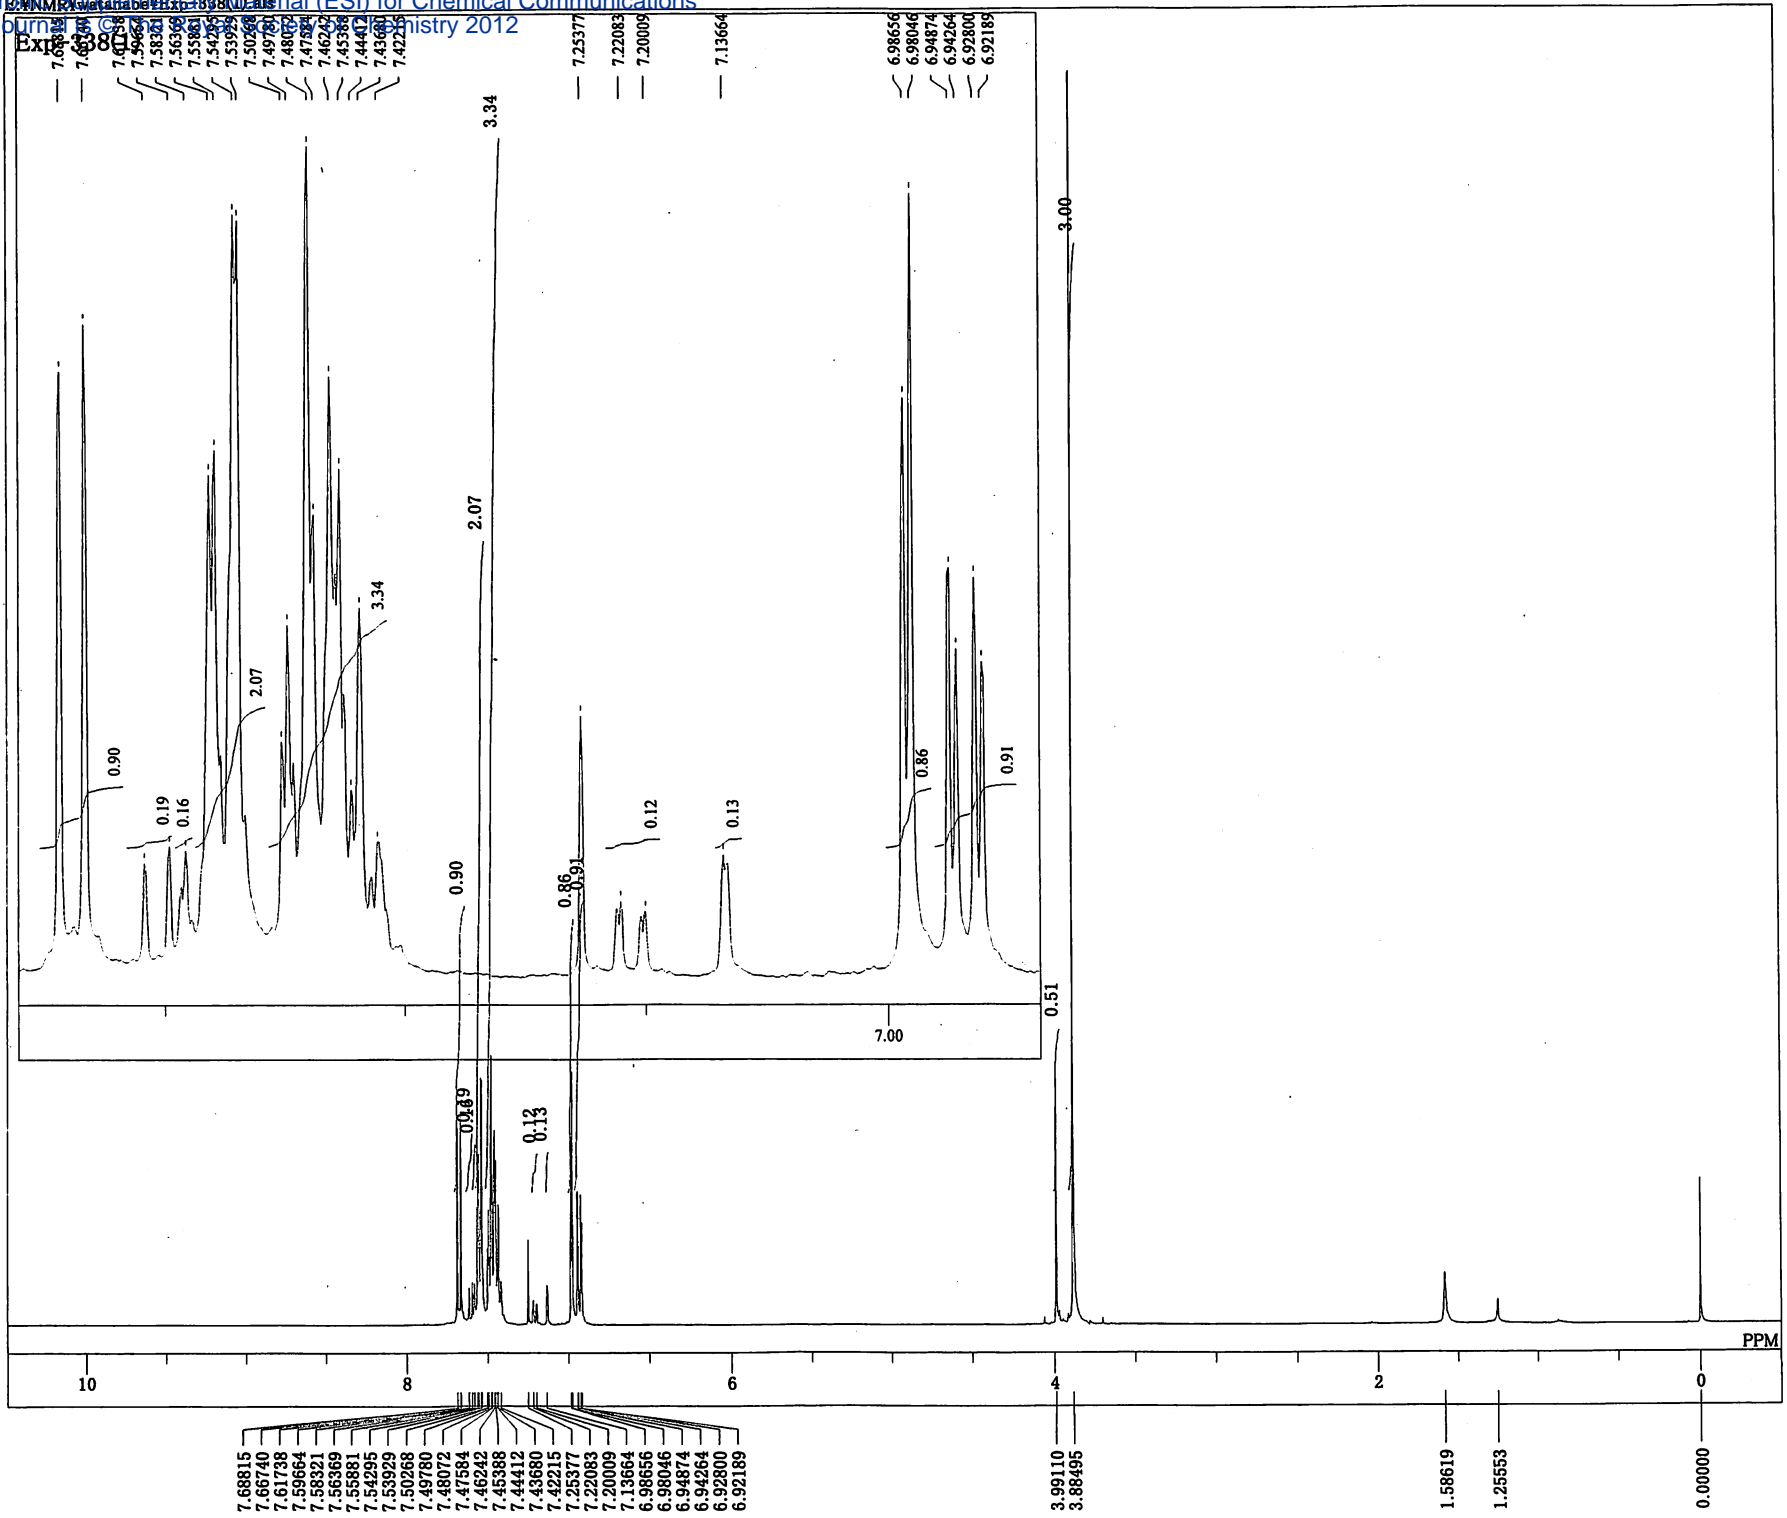

DFILE Exp-338(1).als  
COMNT Exp-338(1)  
DATIM Tue Sep 20 16:47:47 2011  
OBNUC 1H  
EXMOD NON  
OBFRQ 399.65 MHz  
OBSET 124.00 KHz  
OBFIN 10500.00 Hz  
POINT 16384  
FREQU 7992.01 Hz  
SCANS 16  
ACQTM 2.0501 sec  
PD 2.9500 sec  
PW1 7.20 usec  
IRNUC 1H  
CTEMP 28.0 c  
SLVNT CDCL3  
EXREF 0.00 ppm  
BF 0.10 Hz  
RGAIN 16

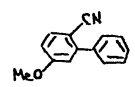

Exp-366(1)-13C

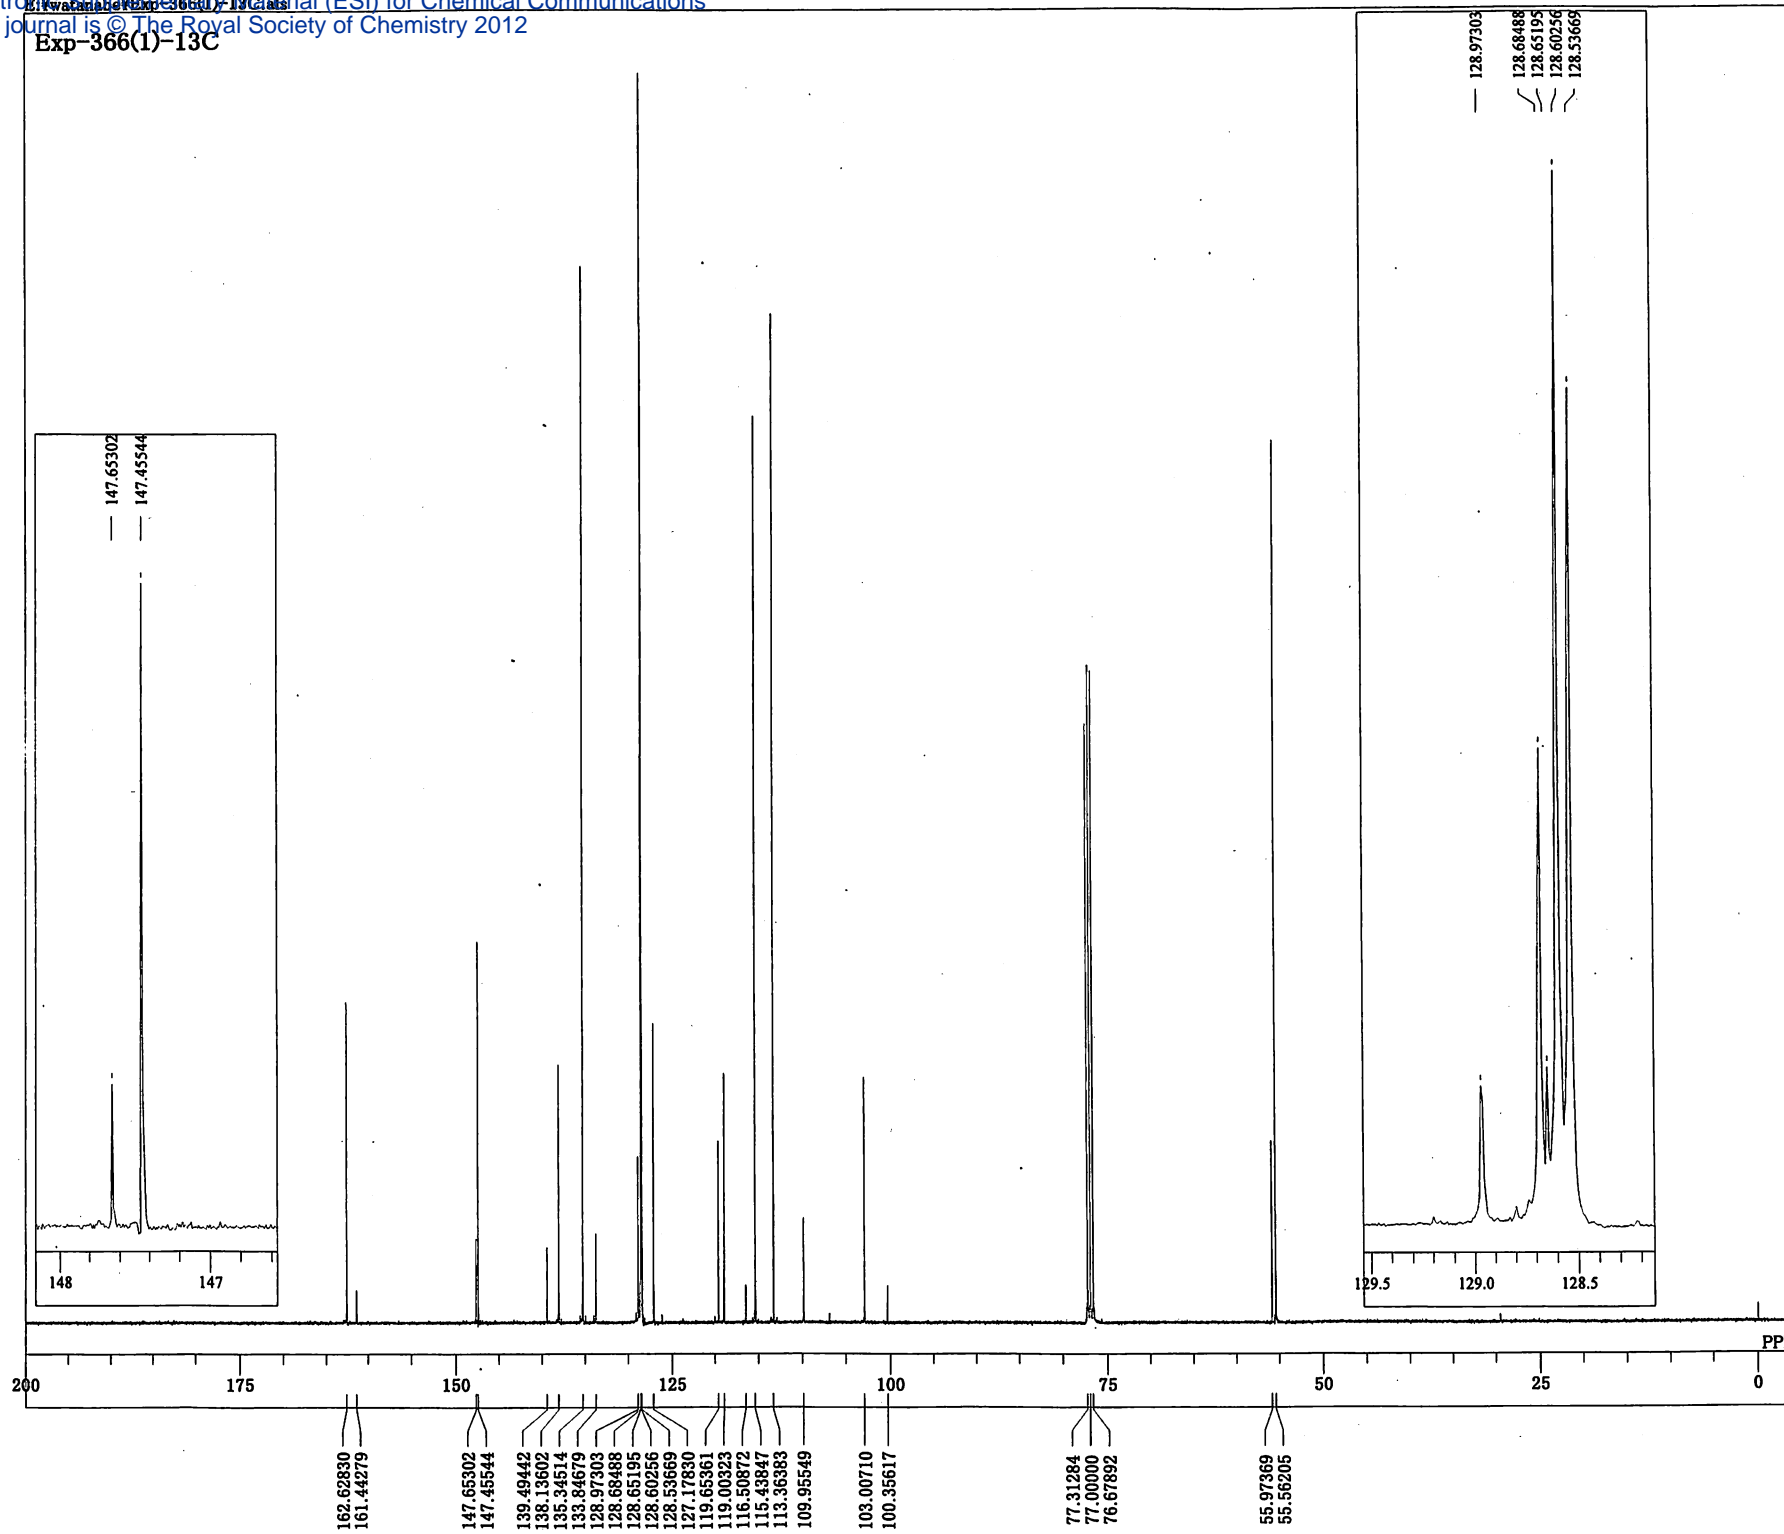

DFILE Exp-366(1)-13C.als  
COMNT Exp-366(1)-13C  
DATIM Tue Nov 22 09:41:29 2011  
OBNUC 13C  
EXMOD BCM  
OBFRQ 100.40 MHz  
OBSET 125.00 KHz  
OBFIN 10500.00 Hz  
POINT 32768  
FREQU 27118.64 Hz  
SCANS 12000  
ACQTM 1.2083 sec  
PD 1.7920 sec  
PW1 4.50 usec  
IRNUC 1H  
CTEMP 28.0 c  
SLVNT CDCL3  
EXREF 77.00 ppm  
BF 0.10 Hz  
RGAIN 31

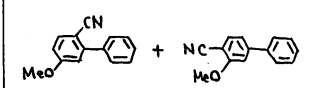

Exp-318(1)

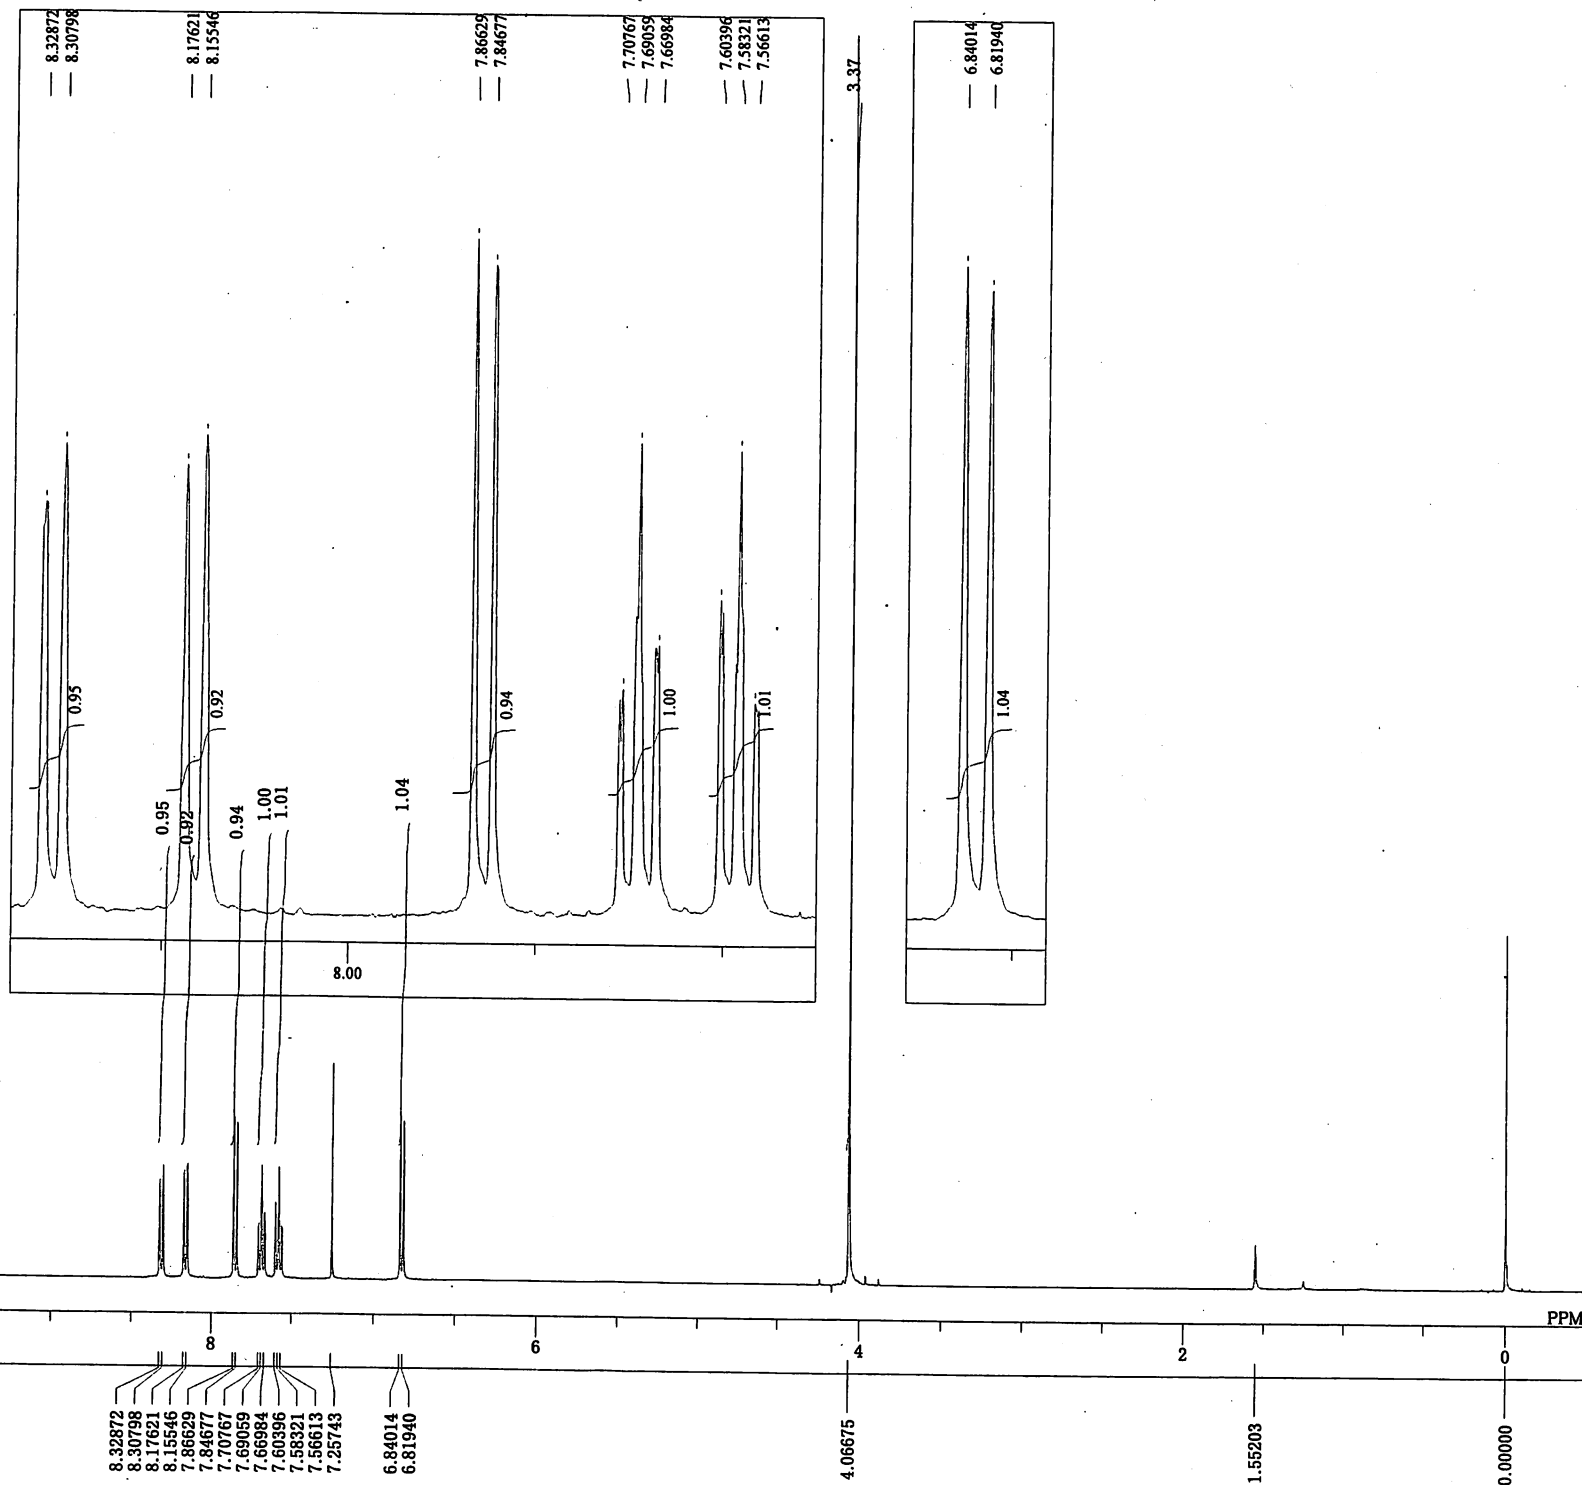

DFILE DEFAULT.ALS  
COMNT Exp-318(1)  
DATIM Wed Aug 31 16:12:17 2011  
OBNUC 1H  
EXMOD NON  
OBFRQ 399.65 MHz  
OBSET 124.00 KHz  
OBFIN 10500.00 Hz  
POINT 16384  
FRFQU 7992.01 Hz  
SCANS 16  
ACQTM 2.0501 sec  
PD 2.9500 sec  
PW1 7.20 usec  
IRNUC 1H  
CTEMP 29.0 c  
SLVNT CDCL3  
EXREF 0.00 ppm  
BF 0.10 Hz  
RGAIN 20

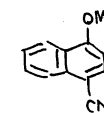

Exp-318(1)-13C

DFILE \_DEFAULT.ALS  
COMNT Exp-318(1)-13C  
DATIM Wed Aug 31 21:07:33 2011  
OBNUC 13C  
EXMOD BCM  
OBFREQ 100.40 MHz  
OBSET 125.00 KHz  
OBFIN 10500.00 Hz  
POINT 32768  
FREQU 27118.64 Hz  
SCANS 256  
ACQTM 1.2083 sec  
PD 1.7920 sec  
PW1 4.50 usec  
IRNUC 1H  
CTEMP 28.2 c  
SLVNT CDCL3  
EXREF 77.00 ppm  
BF 0.10 Hz  
RGAIN 31

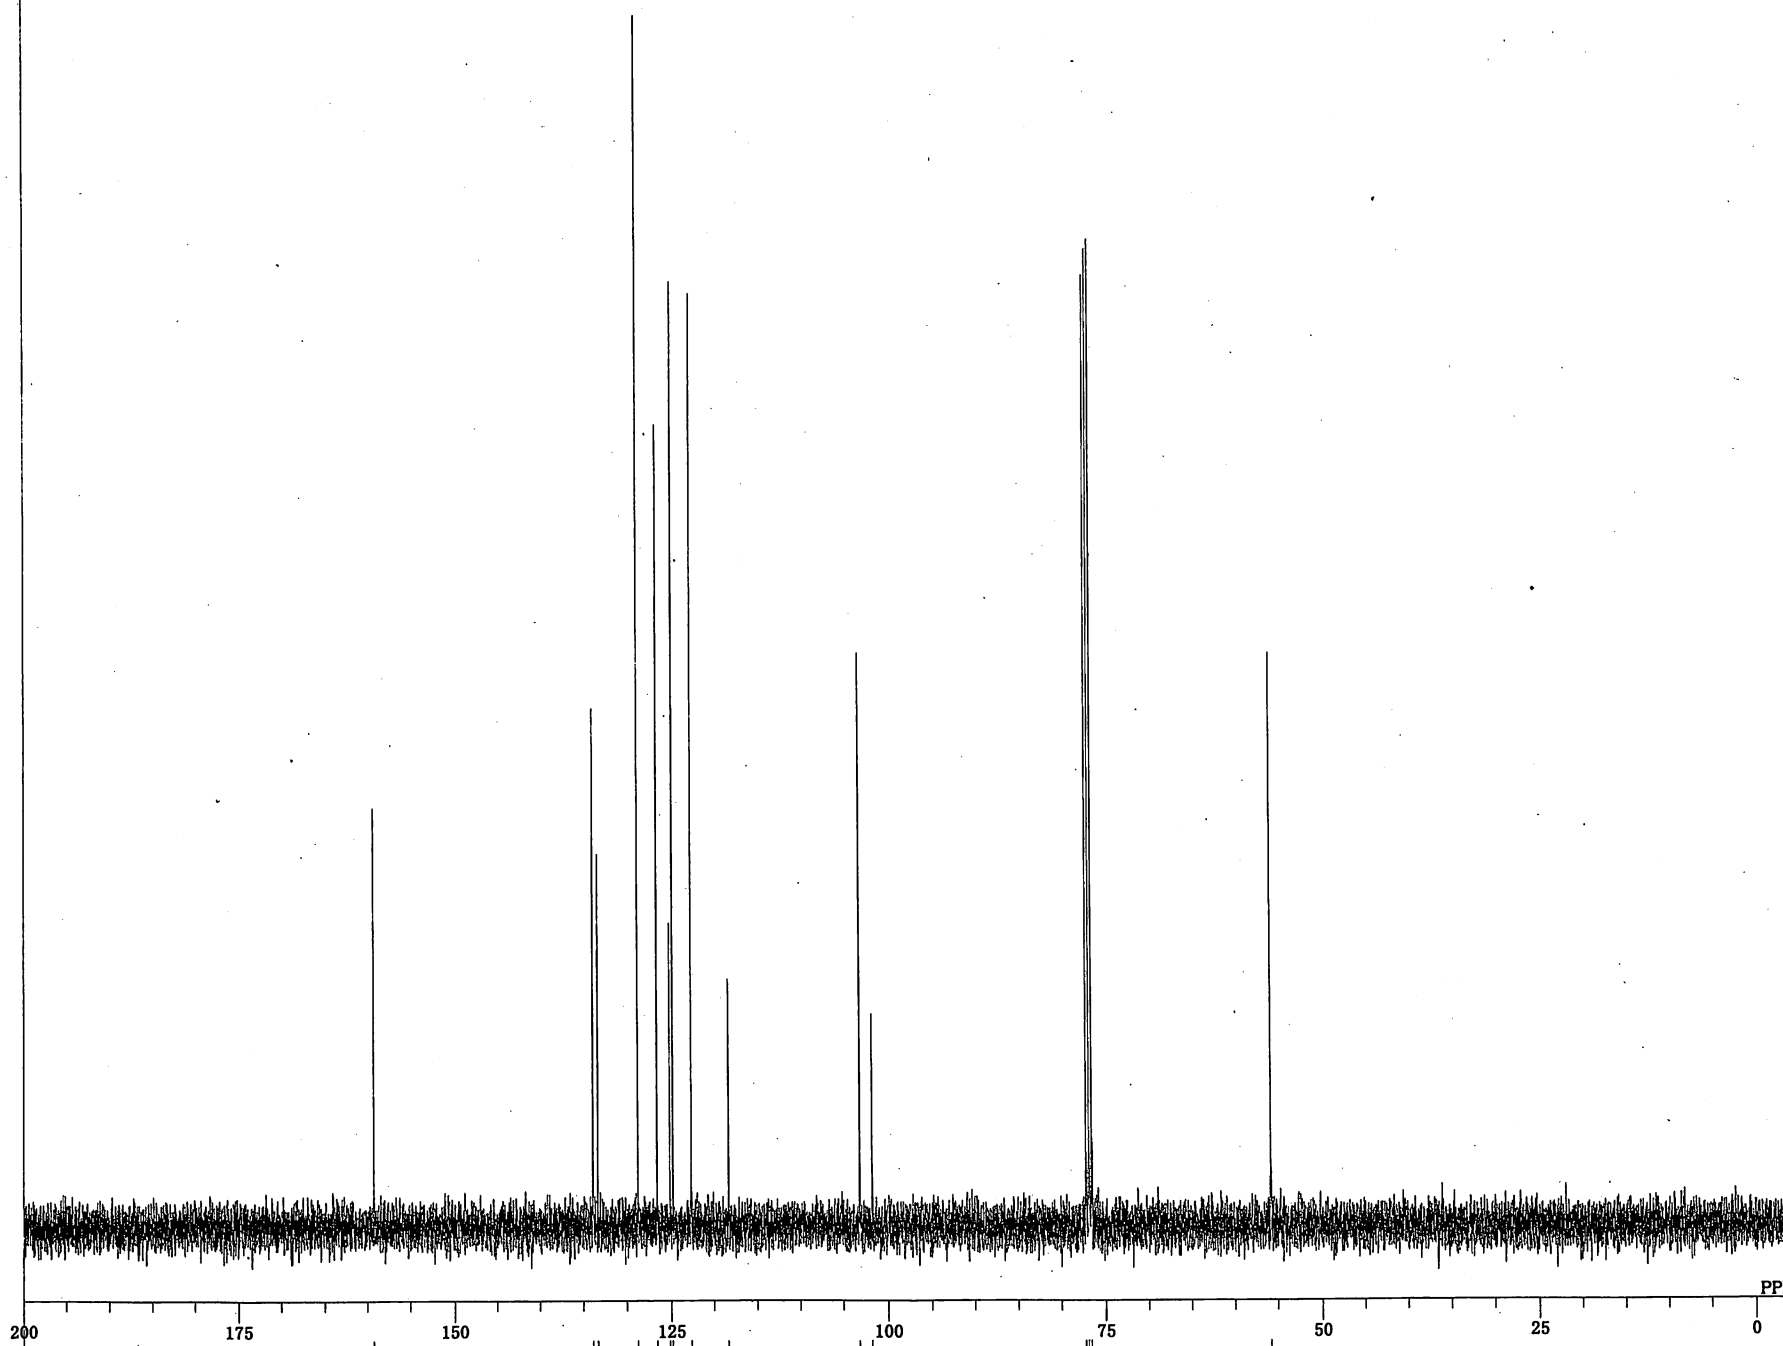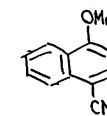

Exp-319(1)

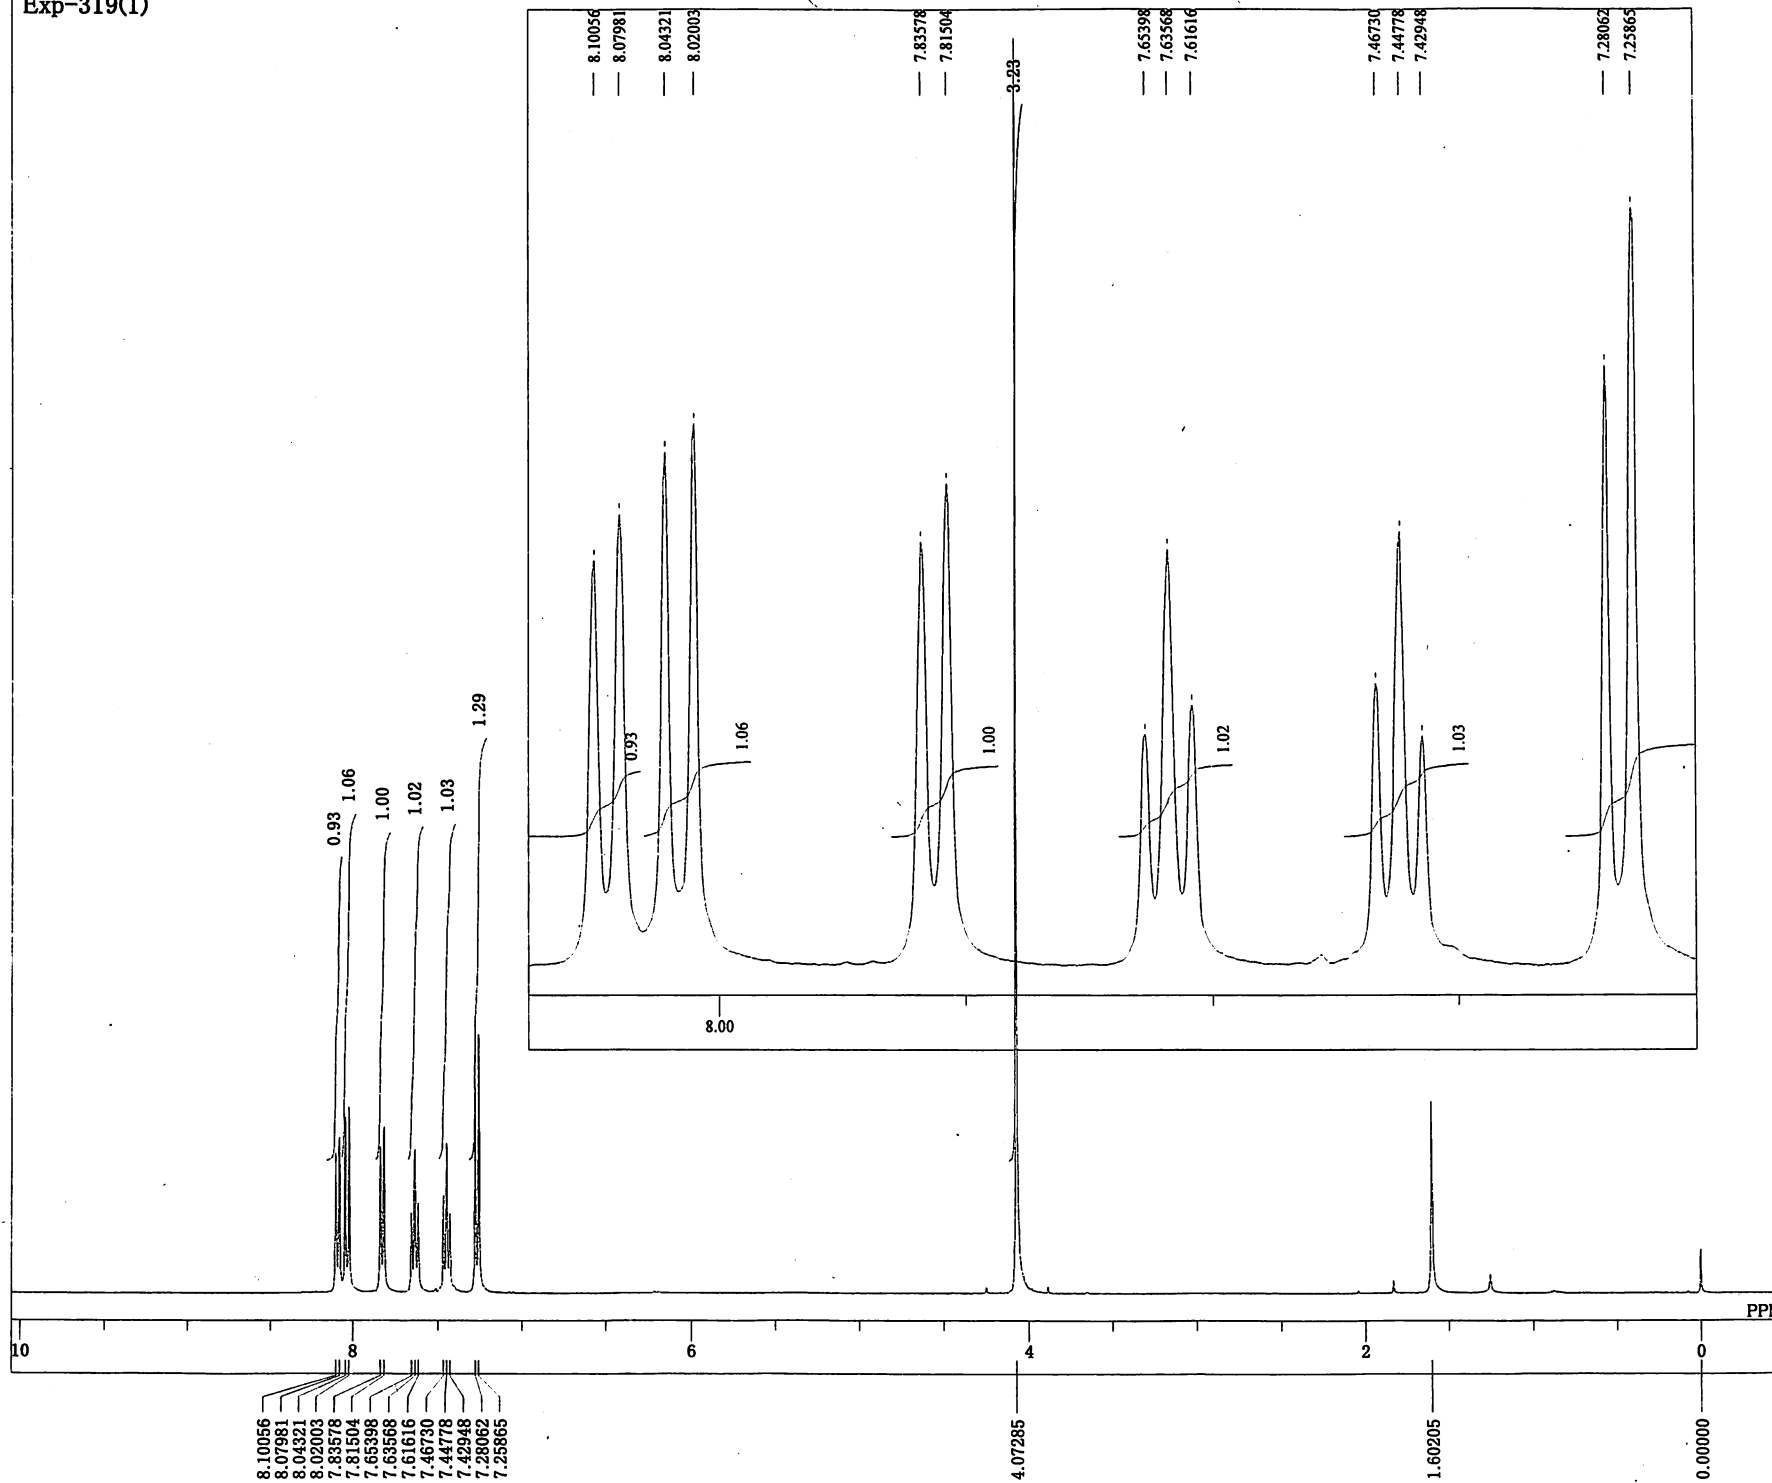

DRFILE \_DEFAULT.ALS  
COMINT Exp-319(1)  
DATIM Mon Aug 29 13:20:35 2011  
OBNUC 1H  
EXMOD NON  
OBFRQ 399.65 MHz  
OBSET 124.00 KHz  
OBFIN 10500.00 Hz  
POINT 16384  
FREQU 7992.01 Hz  
SCANS 16  
ACQTM 2.0501 sec  
PD 2.9500 sec  
PW1 7.20 usec  
IRNUC 1H  
CTEMP 28.9 c  
SLVNT CDCL3  
EXREF 0.00 ppm  
BF 0.10 Hz  
RGAIN 17

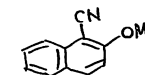

Exp-319(1)-13C

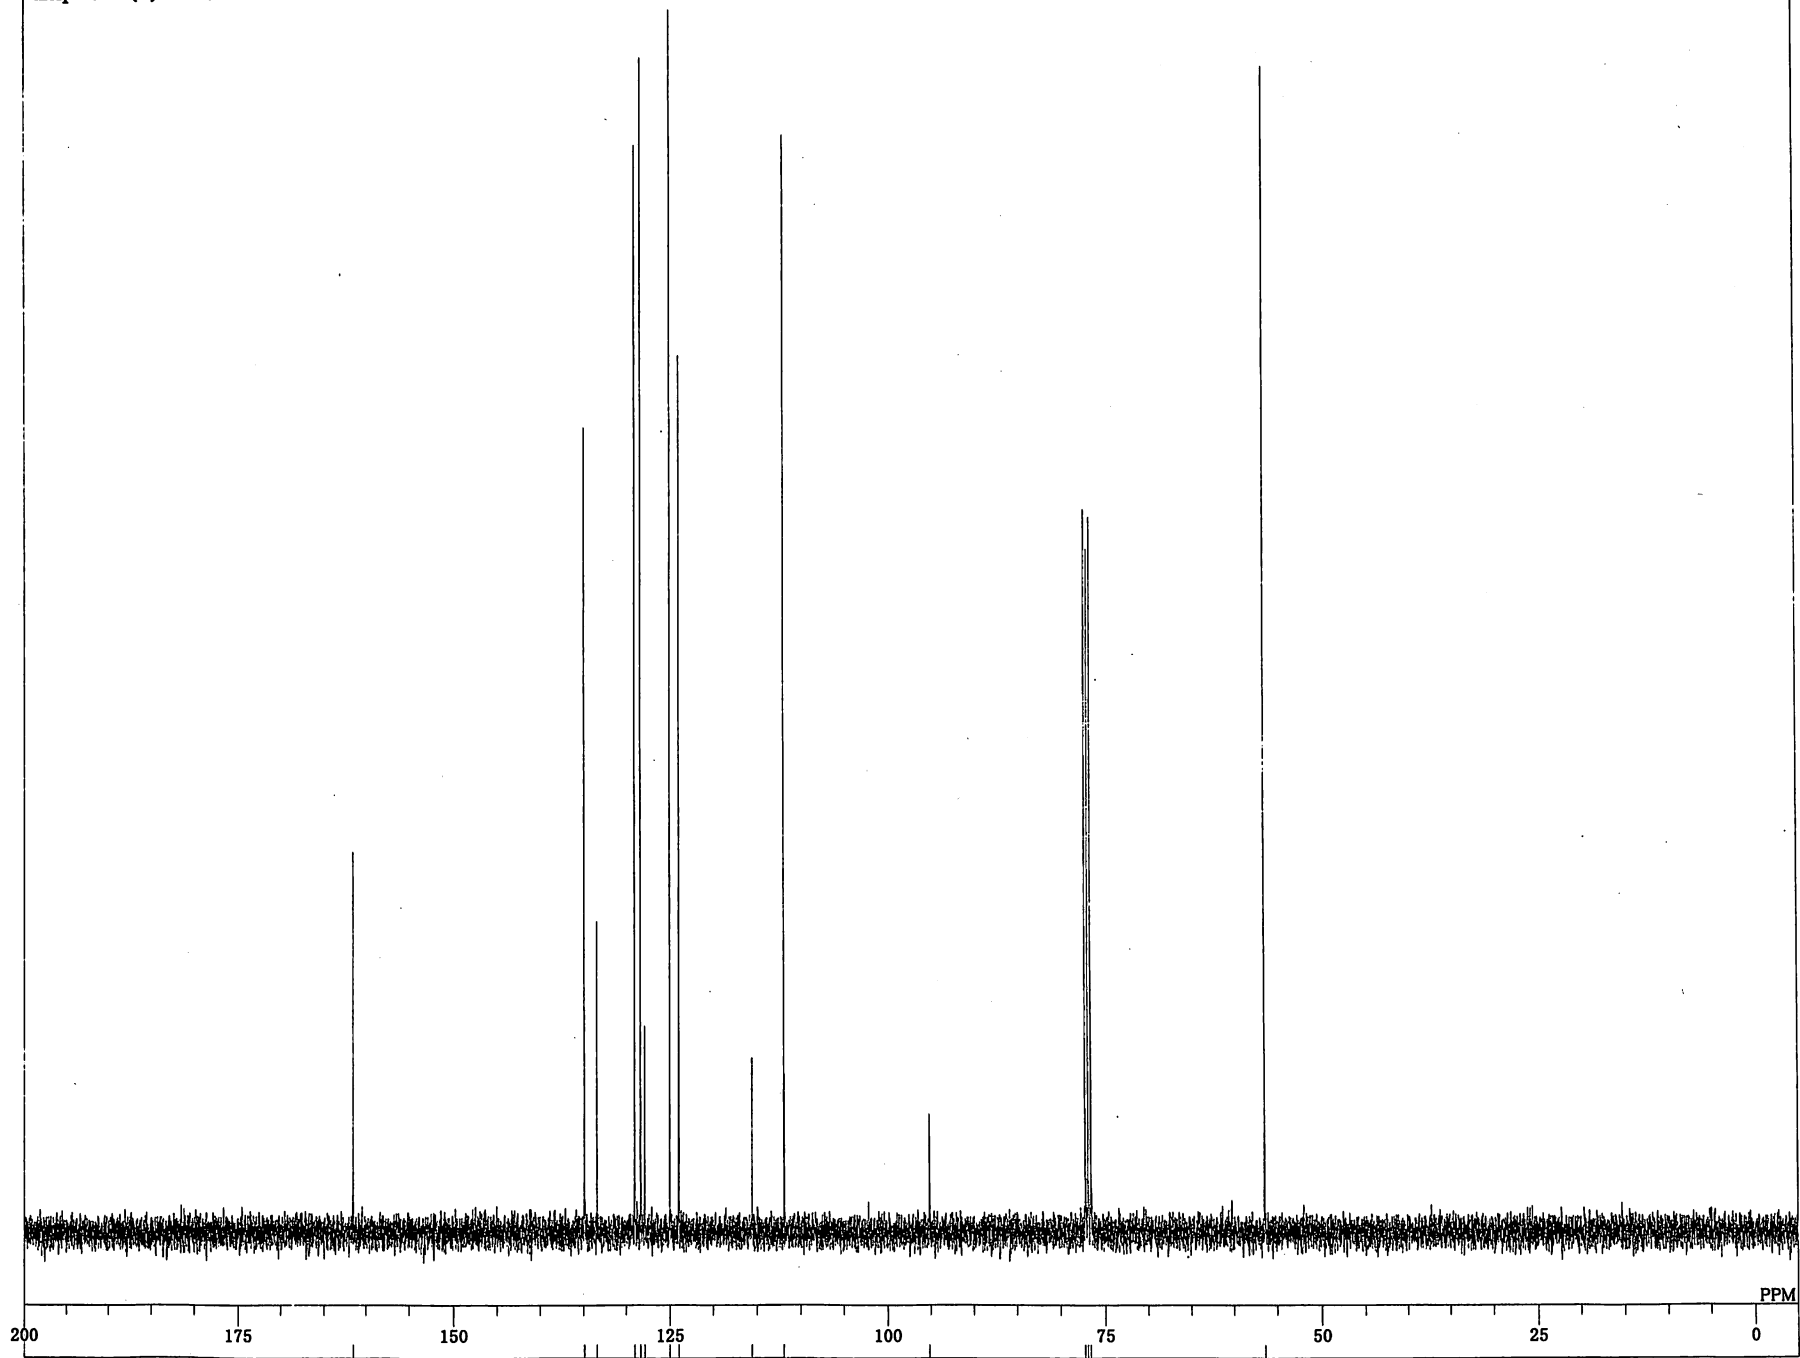

DFILE DEFAULT.ALS  
COMNT Exp-319(1)-13C  
DATIM Mon Aug 29 16:36:43 2011  
OBNUC 13C  
EXMOD BCM  
OBFRQ 100.40 MHz  
OBSET 125.00 KHz  
OBFIN 10500.00 Hz  
POINT 32768  
FREQU 27118.64 Hz  
SCANS 256  
ACQTM 1.2083 sec  
PD 1.7920 sec  
PW1 4.50 usec  
IRNUC 1H  
CTEMP 28.2 c  
SLVNT CDCL3  
EXREF 77.00 ppm  
BF 0.10 Hz  
RGAIN 31

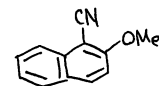

Exp-306(1)

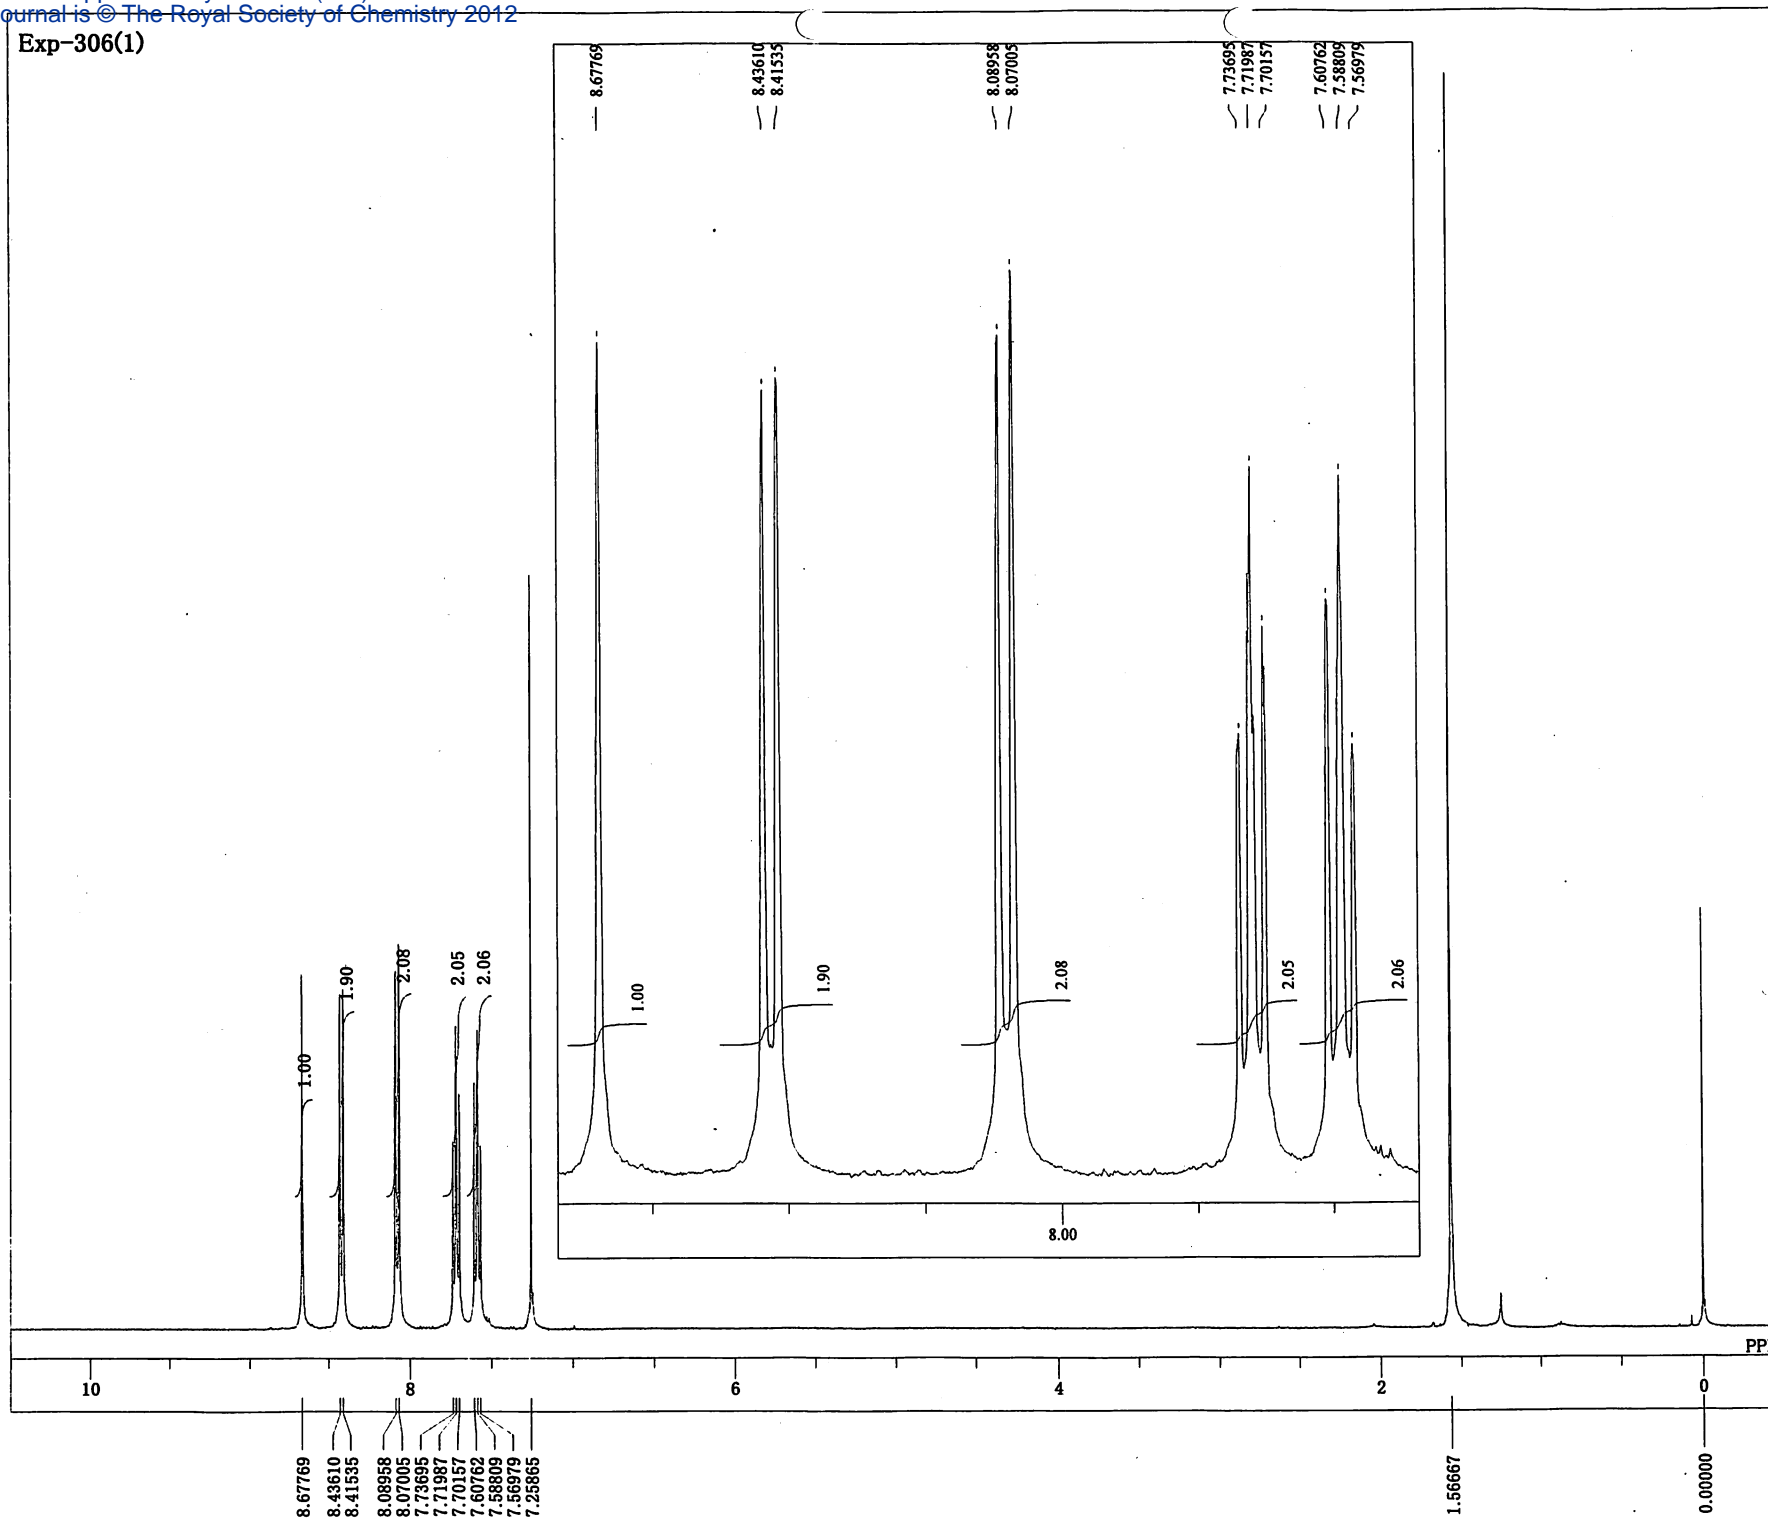

DFILE \_DEFAULT.ALS  
COMNT Exp-306(1)  
DATIM Mon Aug 22 17:25:59 2011  
OBNUC 1H  
EXMOD NON  
OBFRQ 399.65 MHz  
OBSET 124.00 KHz  
OBFIN 10500.00 Hz  
POINT 16384  
FREQU 7992.01 Hz  
SCANS 16  
ACQTM 2.0501 sec  
PD 2.9500 sec  
PW1 7.20 usec  
IRNUC 1H  
CTEMP 28.3 c  
SLVNT CDCL3  
EXREF 0.00 ppm  
BF 0.10 Hz  
RGAIN 21

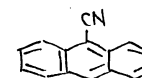



Exp-306(1)-13C

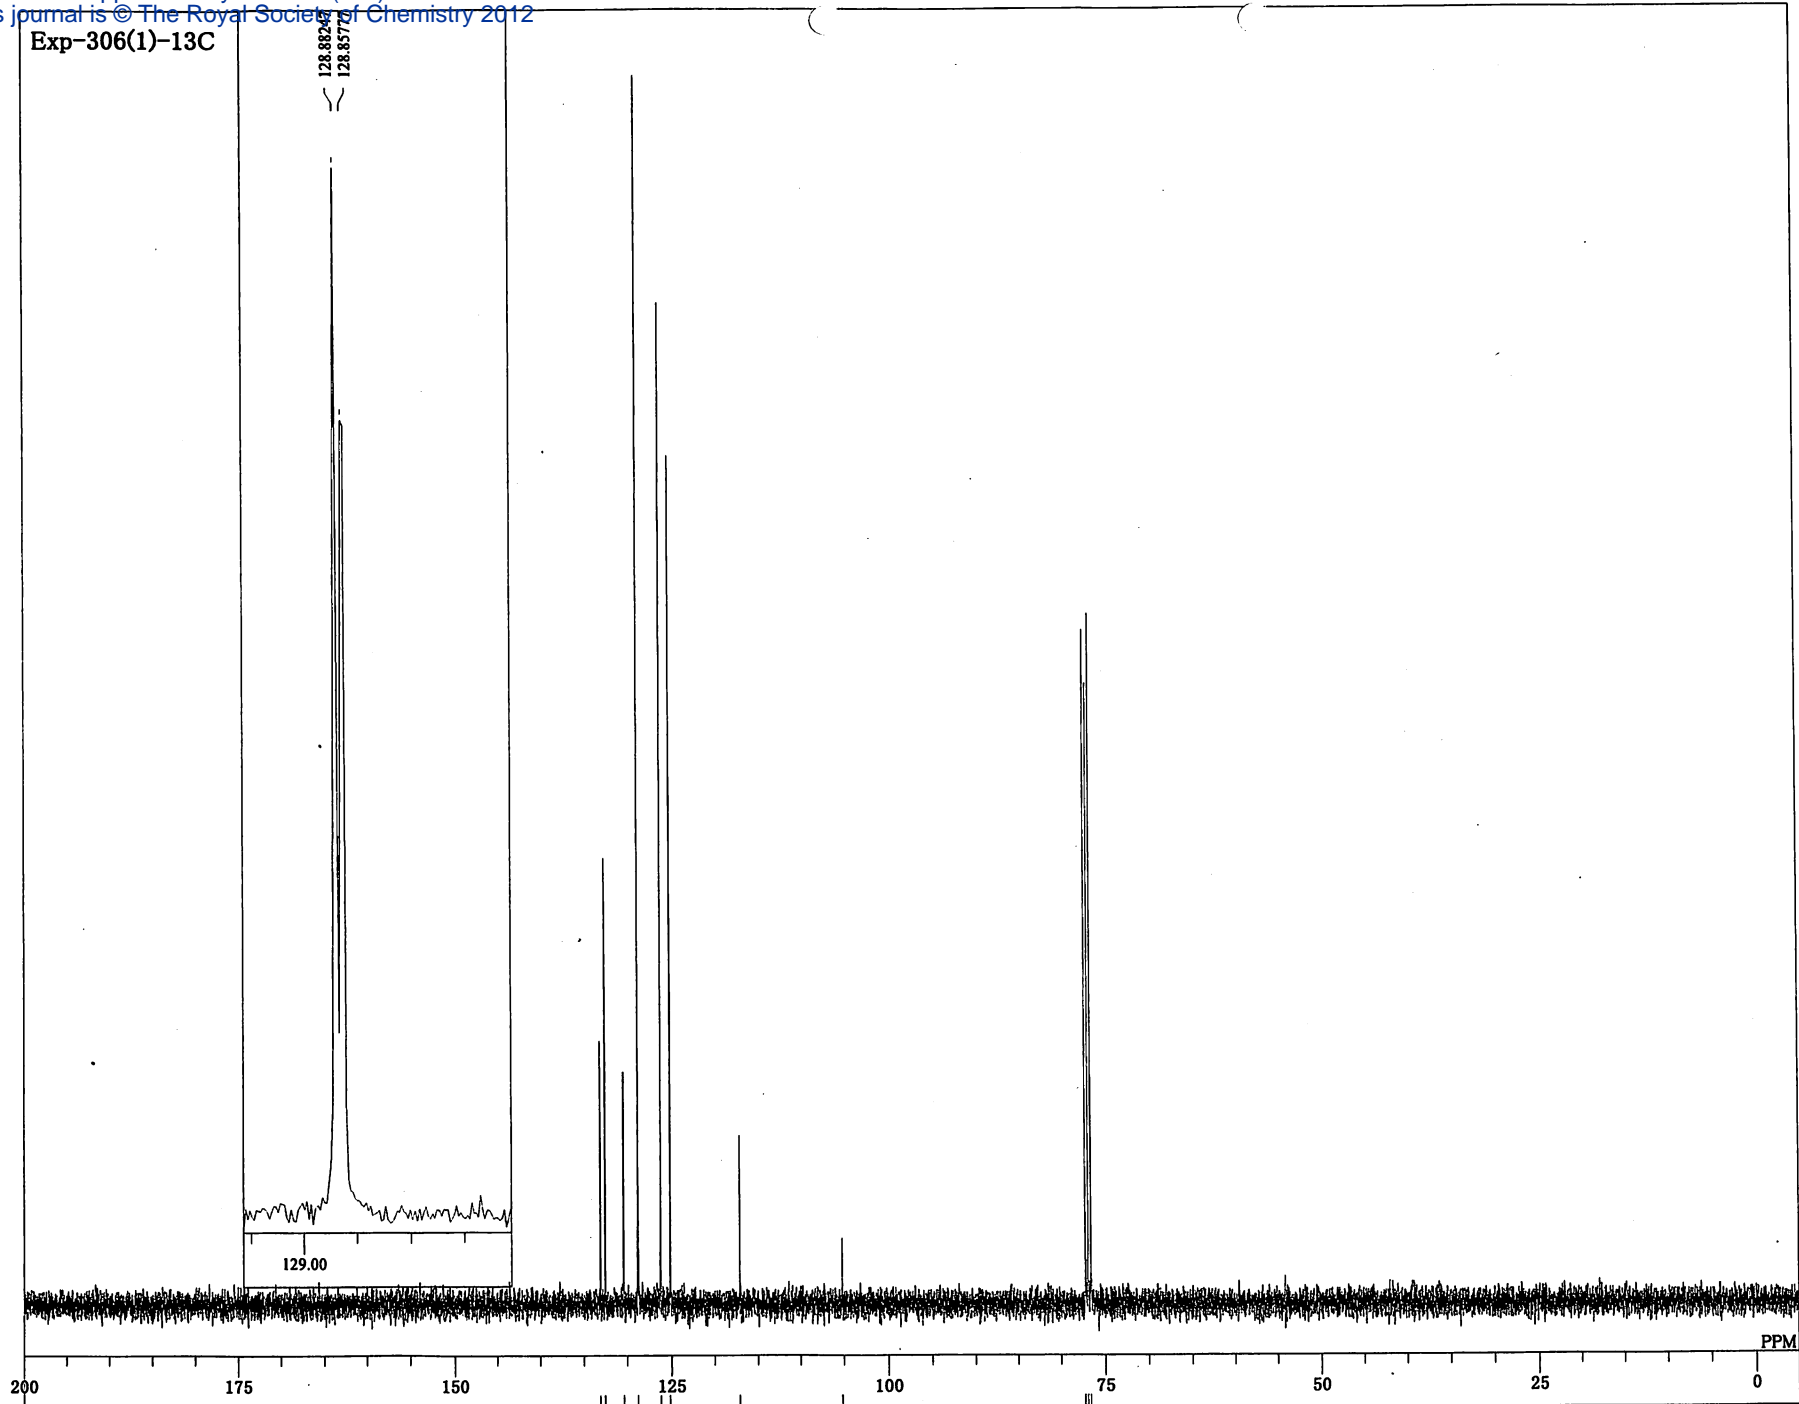

DFILE \_DEFAULT.ALS  
COMNT Exp-306(1)-13C  
DATIM Mon Aug 22 17:48:03 2011  
OBNUC 13C  
EXMOD BCM  
OBFRQ 100.40 MHz  
OBSET 125.00 KHz  
OBFIN 10500.00 Hz  
POINT 32768  
FREQU 27118.64 Hz  
SCANS 256  
ACQTM 1.2083 sec  
PD 1.7920 sec  
PW1 4.50 usec  
IRNUC 1H  
CTEMP 27.5 c  
SLVNT CDCL3  
EXREF 77.00 ppm  
BF 0.10 Hz  
RGAIN 30

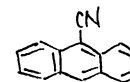

13.19641  
12.63668  
10.51255  
8.88247  
8.85777  
8.26447  
8.17776

17.18381

15.31225

7.32108  
7.00000  
6.88716

PPM

Exp-335(1)

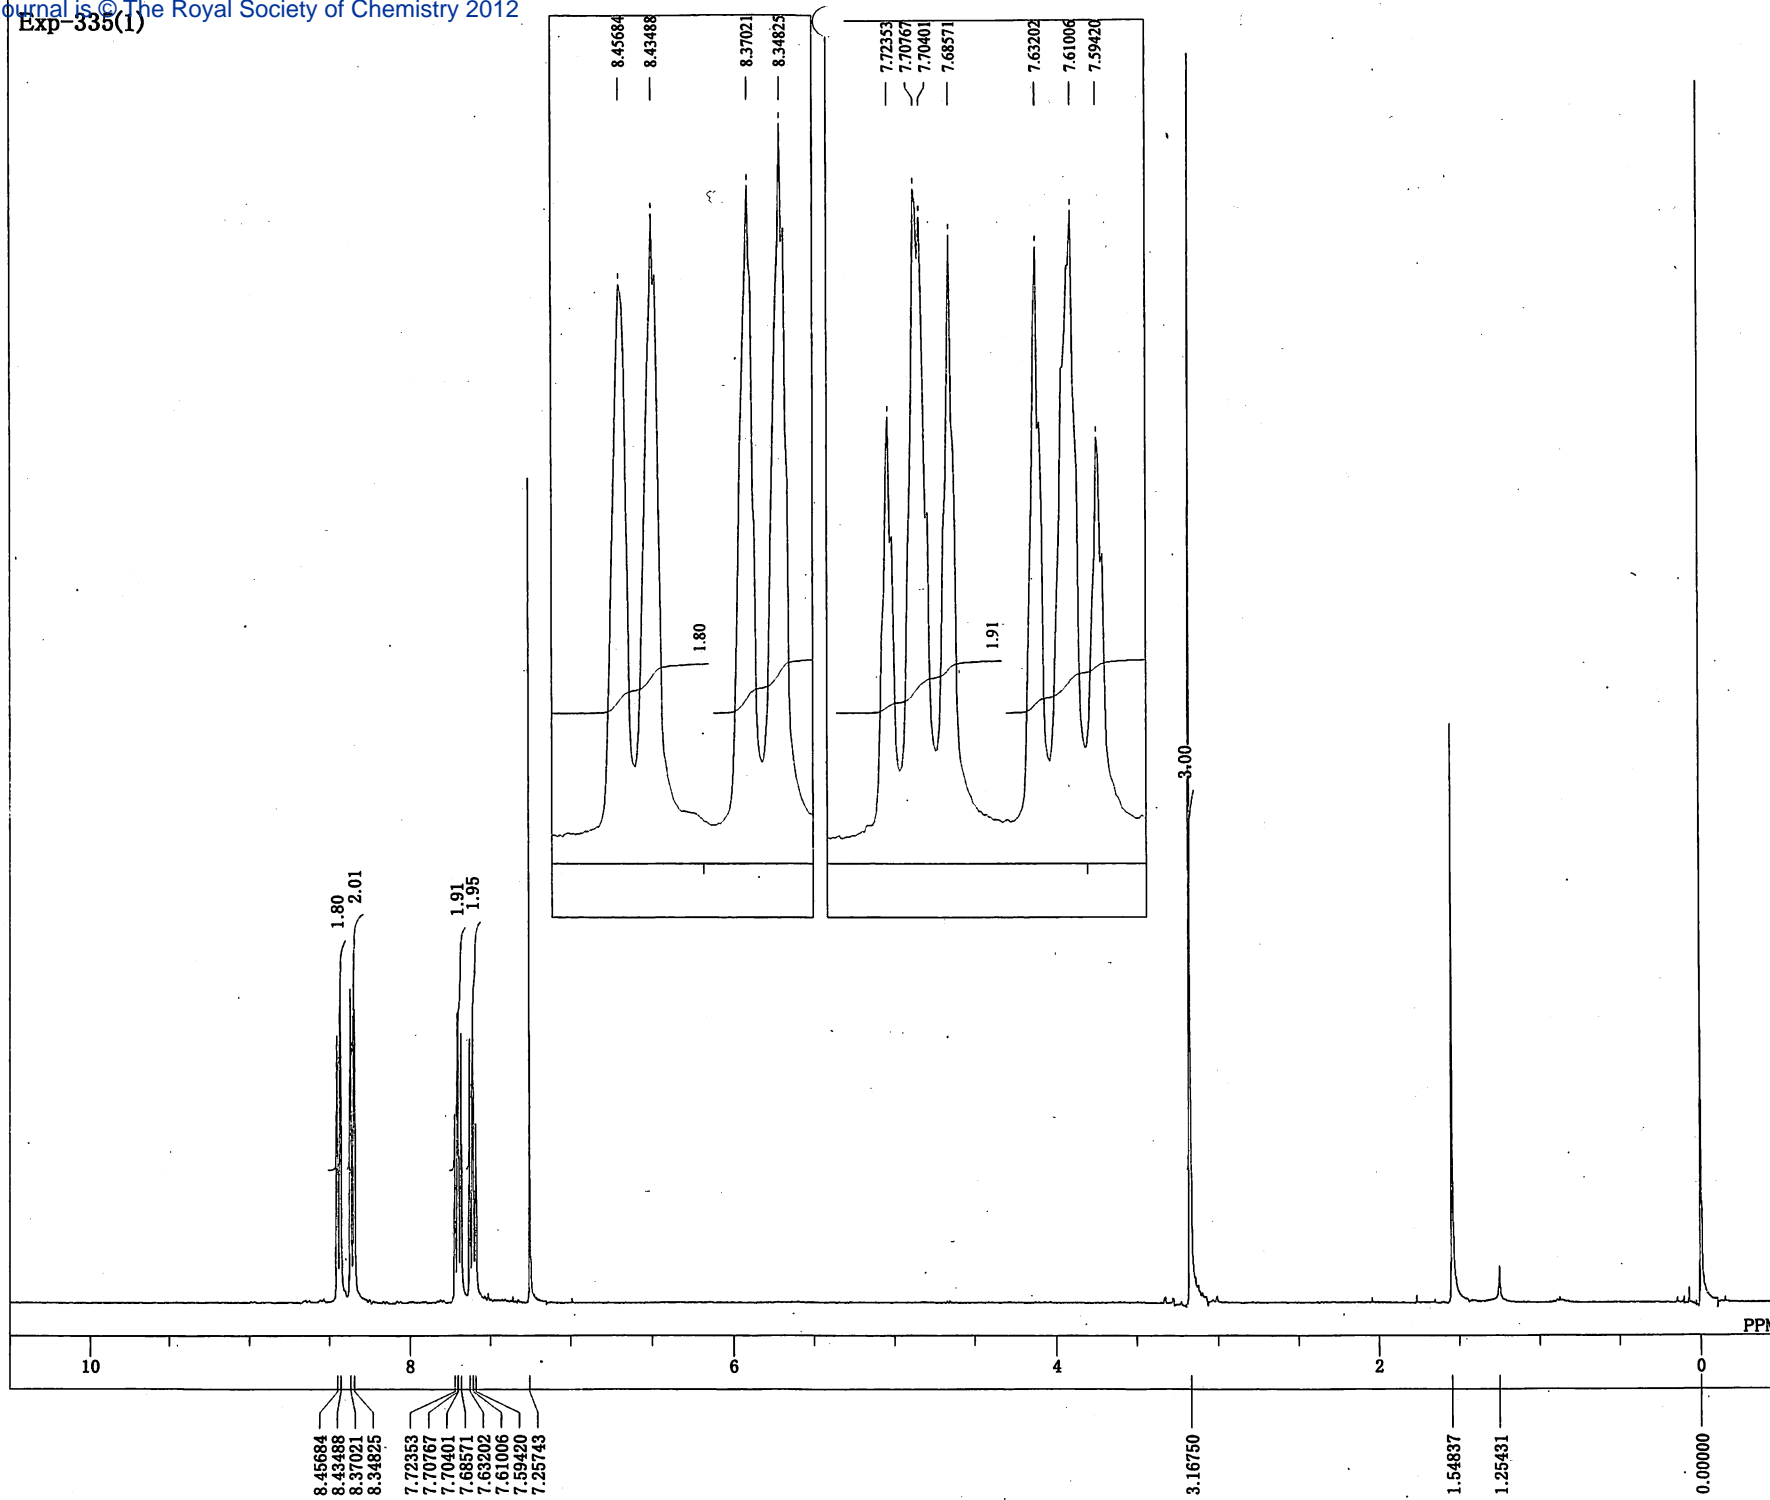

DFILE .DEFAULT.ALS  
COMNT Exp-335(1)  
DATIM Thu Sep 15 13:36:27 2011  
OBNUC 1H  
EXMOD NON  
OBFRQ 399.65 MHz  
OBSET 124.00 KHz  
OBFIN 10500.00 Hz  
POINT 16384  
FREQU 7992.01 Hz  
SCANS 16  
ACQTM 2.0501 sec  
PD 2.9500 sec  
PW1 7.20 usec  
IRNUC 1H  
CTEMP 29.5 c  
SLVNT CDCL3  
EXREF 0.00 ppm  
BF 0.10 Hz  
RGAIN 21

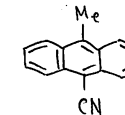

Exp-335(1)-13C

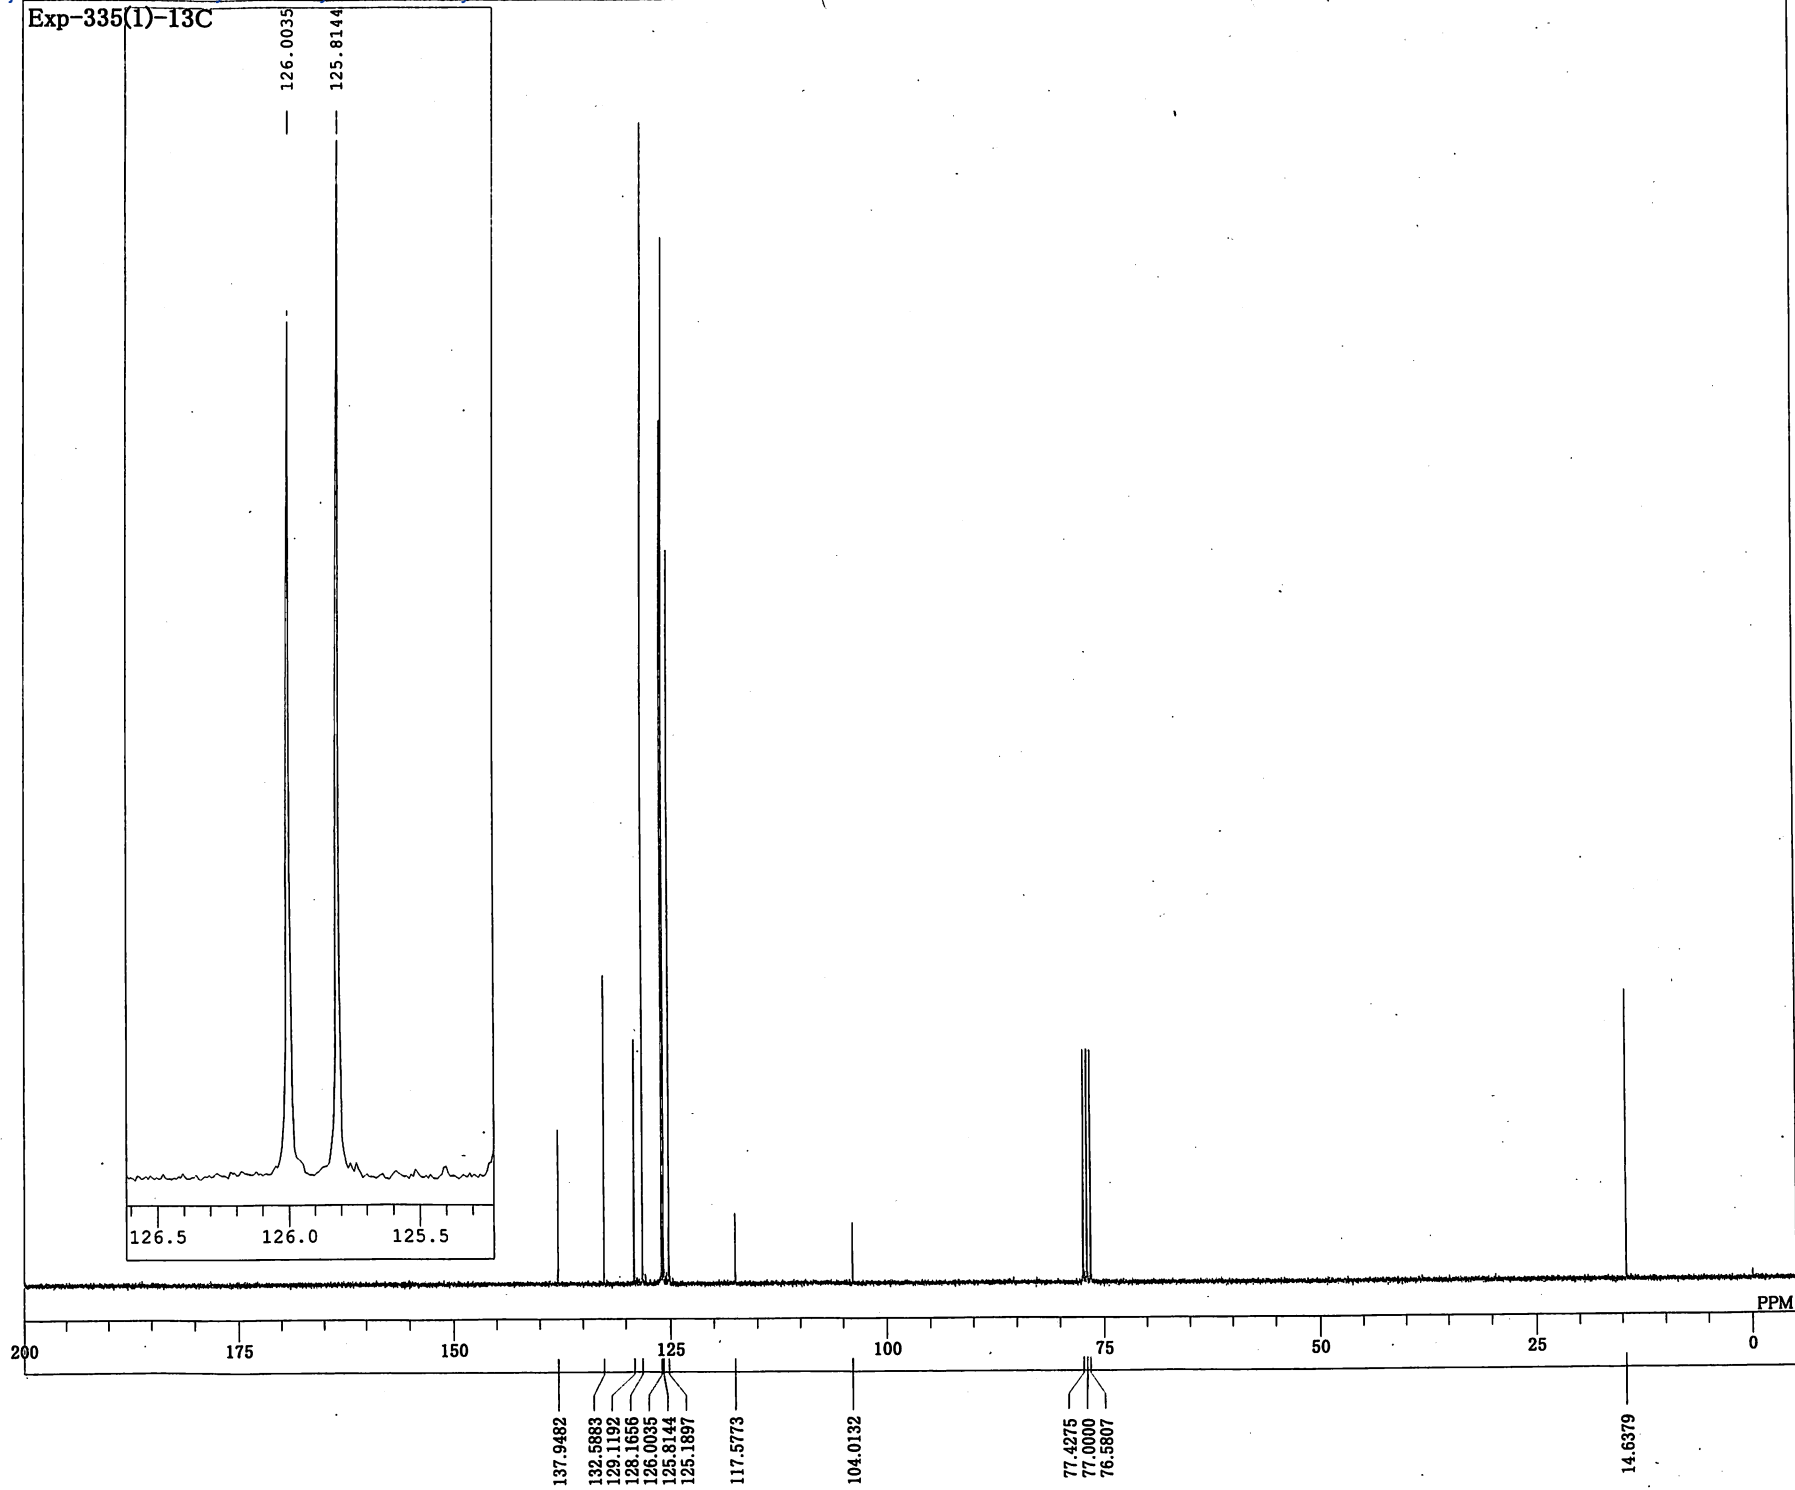

DFILE DEFAULT.ALS  
COMNT Exp-335(1)-13C  
DATIM Thu Sep 15 19:02:54 2011  
OBNUC 13C  
EXMOD BCM  
OBFRQ 75.45 MHz  
OBSET 124.00 KHz  
OBFIN 1840.00 Hz  
POINT 32768  
FREQU 20356.23 Hz  
SCANS 2048  
ACQTM 1.6097 sec  
PD 1.3900 sec  
PW1 4.50 usec  
IRNUC 1H  
CTEMP 25.0 c  
SLVNT CDCL3  
EXREF 77.00 ppm  
BF 0.12 Hz  
RGAIN 28

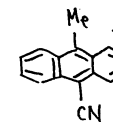

Exp-351(1)

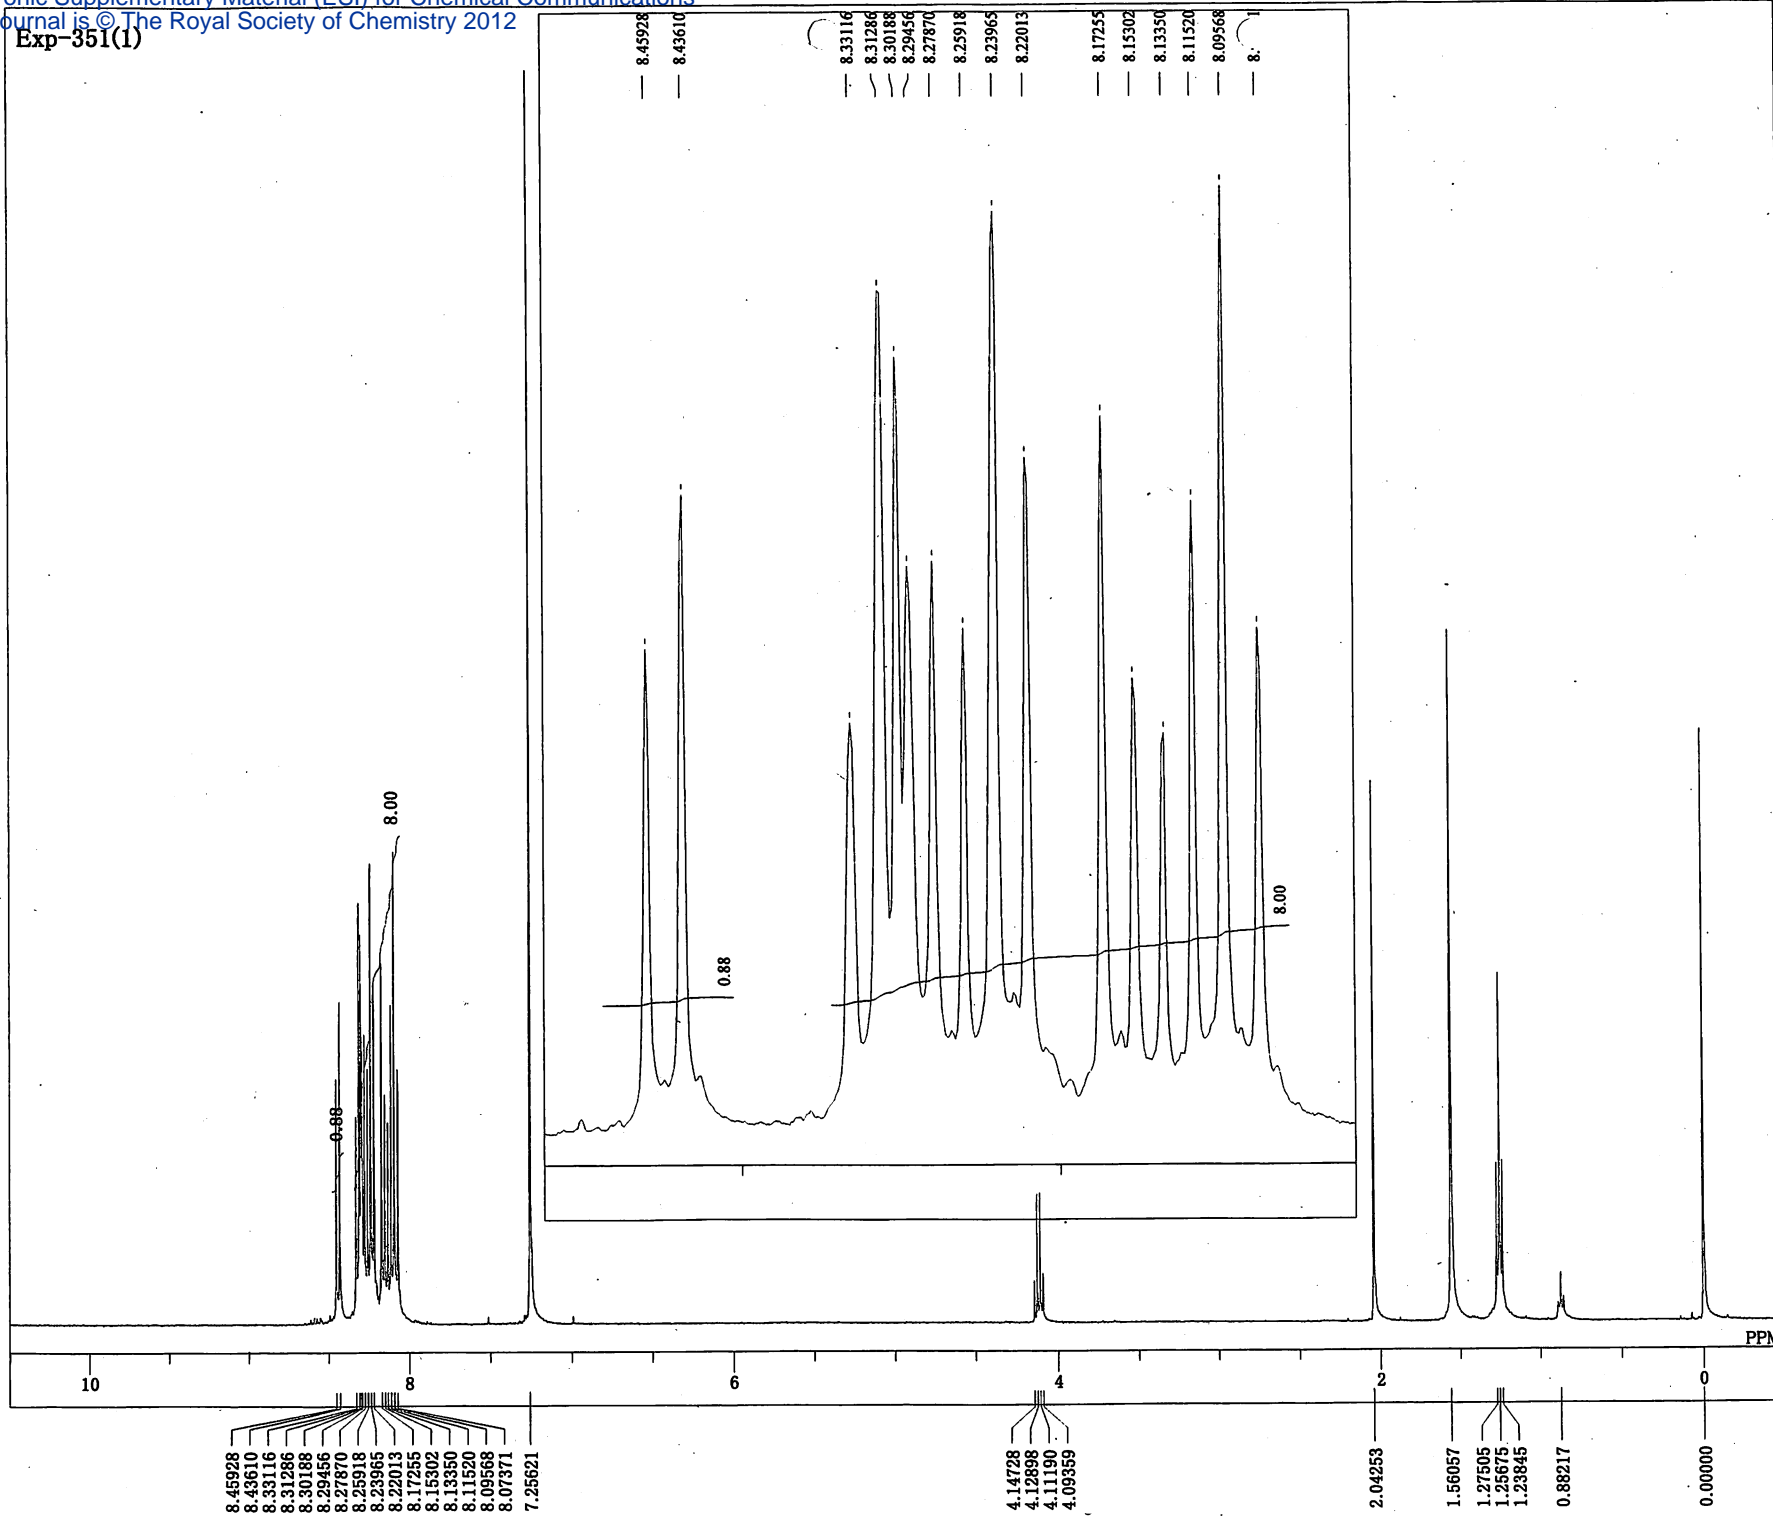

DFILE Exp-351(1).als  
COMNT Exp-351(1)  
DATIM Tue Sep 27 19:51:01 2011  
OBNUC 1H  
EXMOD NON  
OBFRQ 399.65 MHz  
OBSET 124.00 KHz  
OBFIN 10500.00 Hz  
POINT 16384  
FREQU 7992.01 Hz  
SCANS 16  
ACQTM 2.0501 sec  
PD 2.9500 sec  
PW1 7.20 usec  
IRNUC 1H  
CTEMP 28.7 c  
SLVNT CDCL3  
EXREF 0.00 ppm  
BF 0.10 Hz  
RGAIN 21

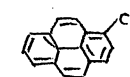

Exp-345(1)-13C

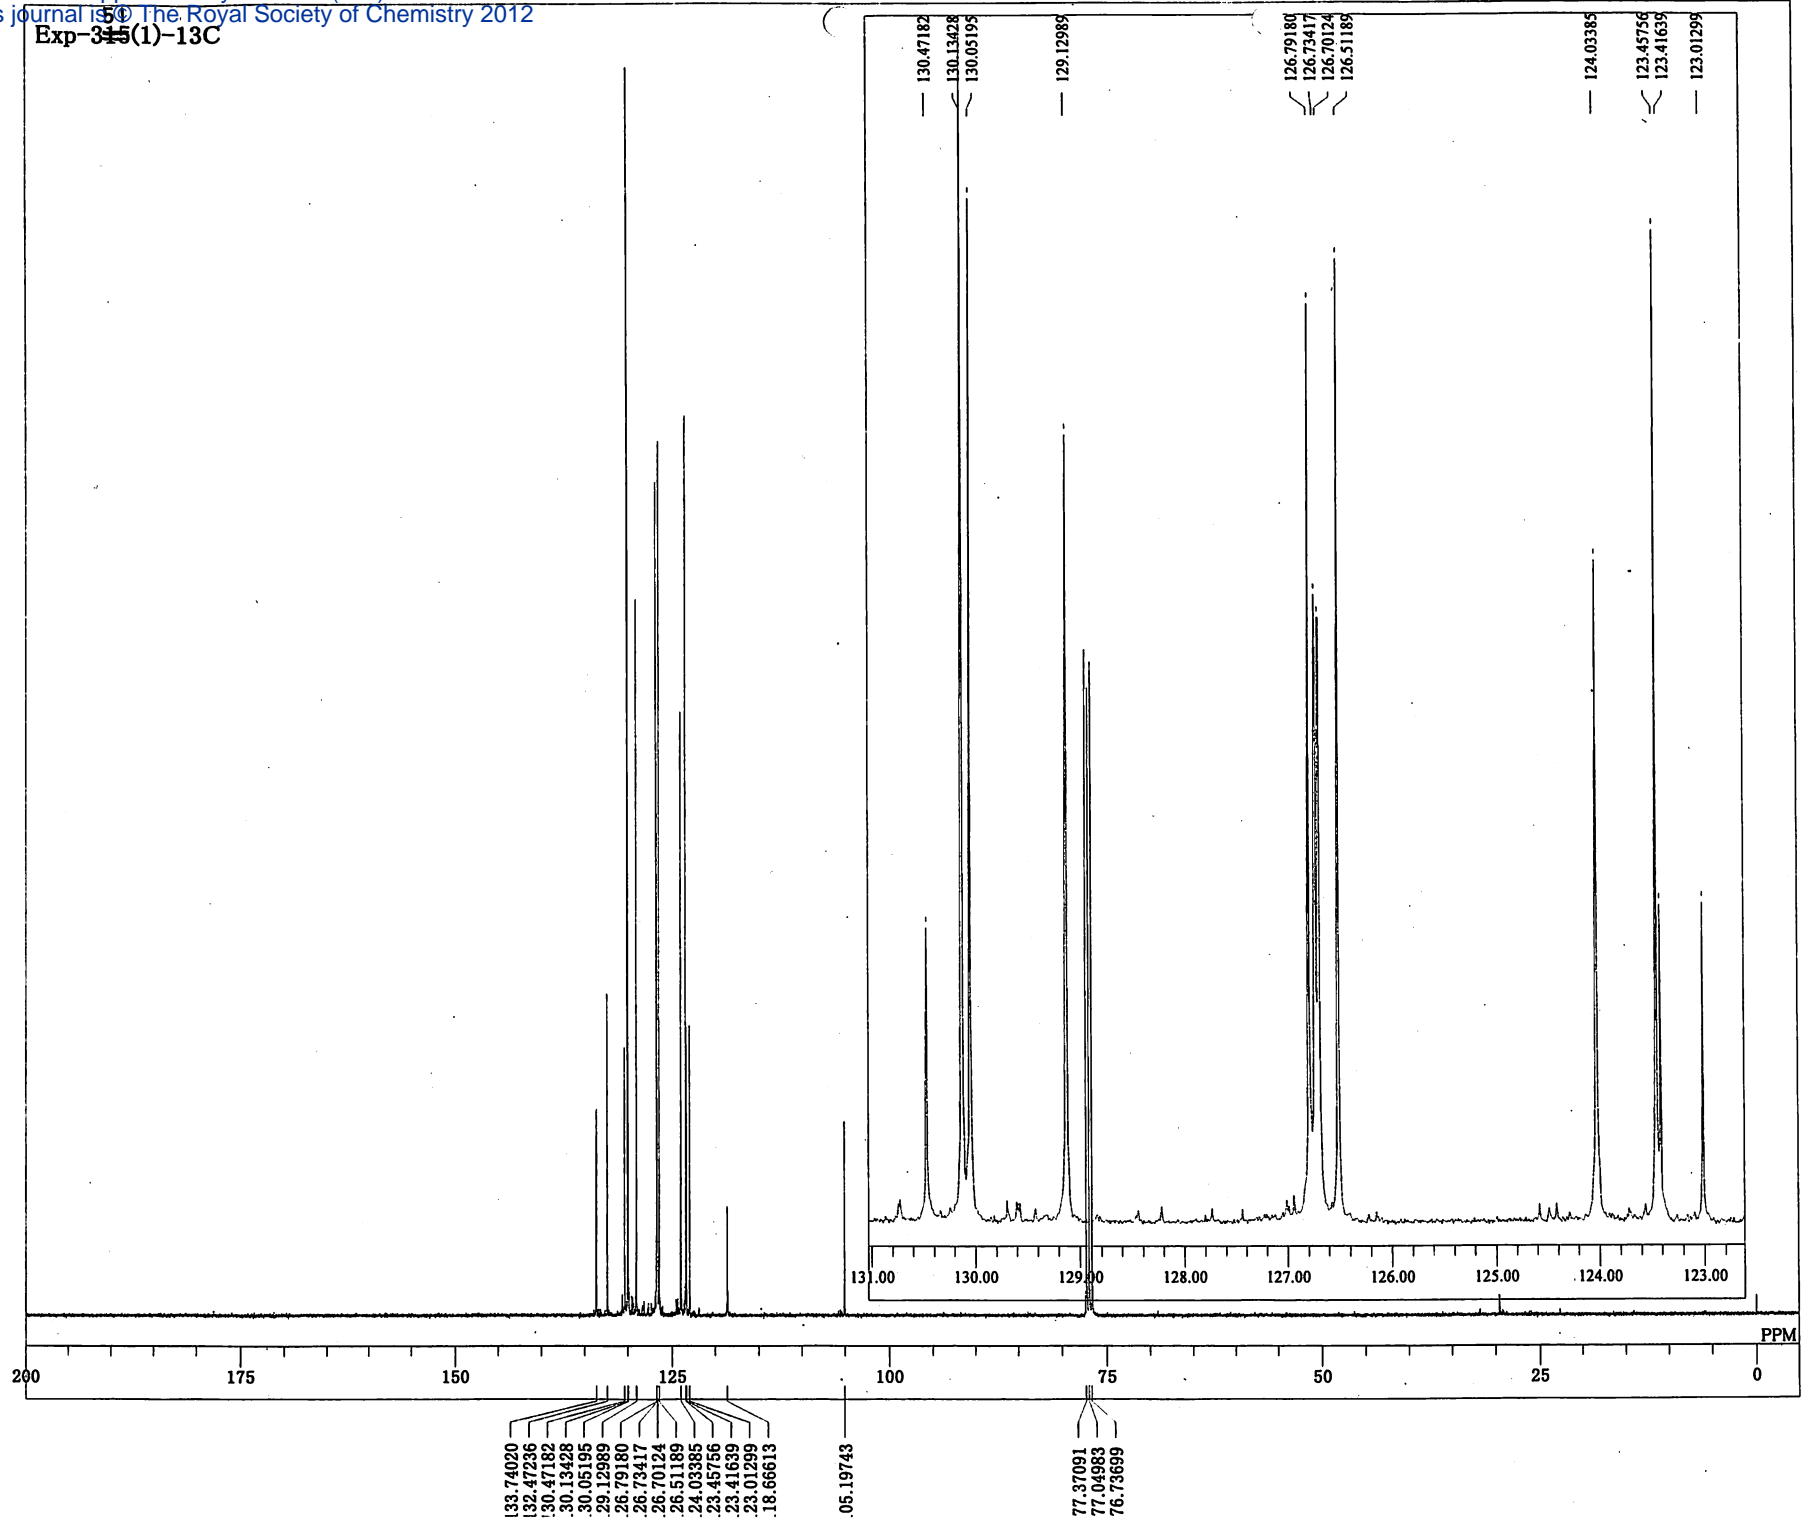

DFILE DEFAULT.ALS  
COMNT Exp-345(1)-13C  
DATIM Fri Sep 30 09:00:11 2011  
OBNUC 13C  
EXMOD BCM  
OBFRQ 100.40 MHz  
OBSET 125.00 KHz  
OBFIN 10500.00 Hz  
POINT 32768  
FREQU 27118.64 Hz  
SCANS 12000  
ACQTM 1.2083 sec  
PD 1.7920 sec  
PW1 4.50 usec  
IRNUC 1H  
CTEMP 28.0 c  
SLVNT CDCL3  
EXREF 0.00 ppm  
BF 0.10 Hz  
RGAIN 31

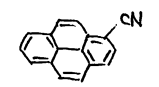

Exp-305(1)

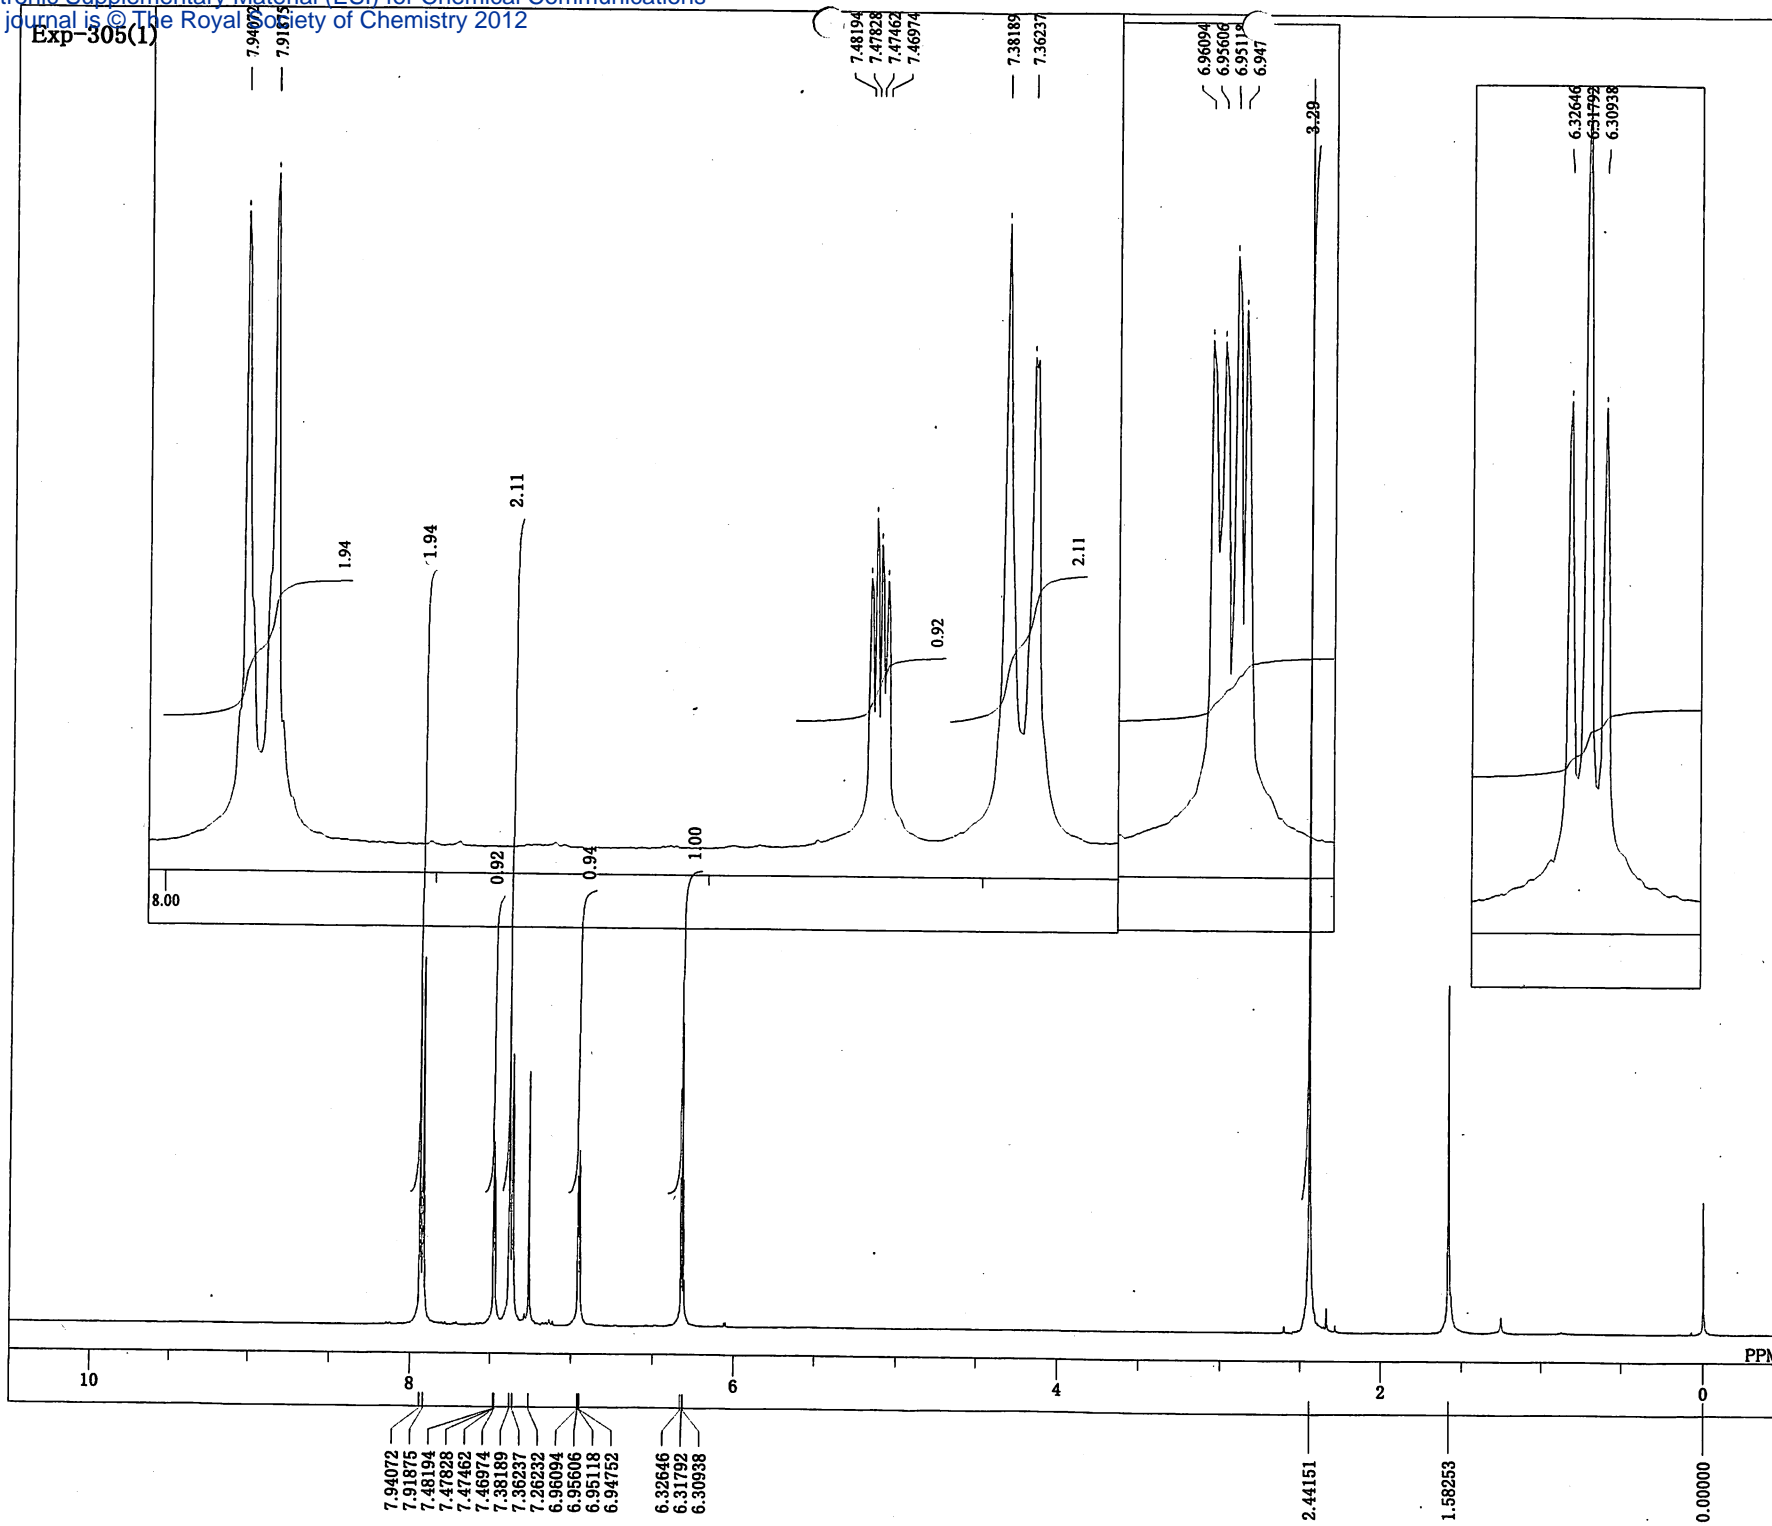

DFILE DEFAULT.ALS  
COMNT Exp-305(1)  
DATIM Mon Aug 22 17:20:00 2011  
OBNUC 1H  
EXMOD NON  
OBFRQ 399.65 MHz  
OBSET 124.00 KHz  
OBFIN 10500.00 Hz  
POINT 16384  
FREQU 7992.01 Hz  
SCANS 16  
ACQTM 2.0501 sec  
PD 2.9500 sec  
PW1 7.20 usec  
IRNUC 1H  
CTEMP 28.6 c  
SLVNT CDCL3  
EXREF 0.00 ppm  
BF 0.10 Hz  
RGAIN 19

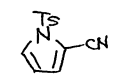

Exp-305(1)-13C

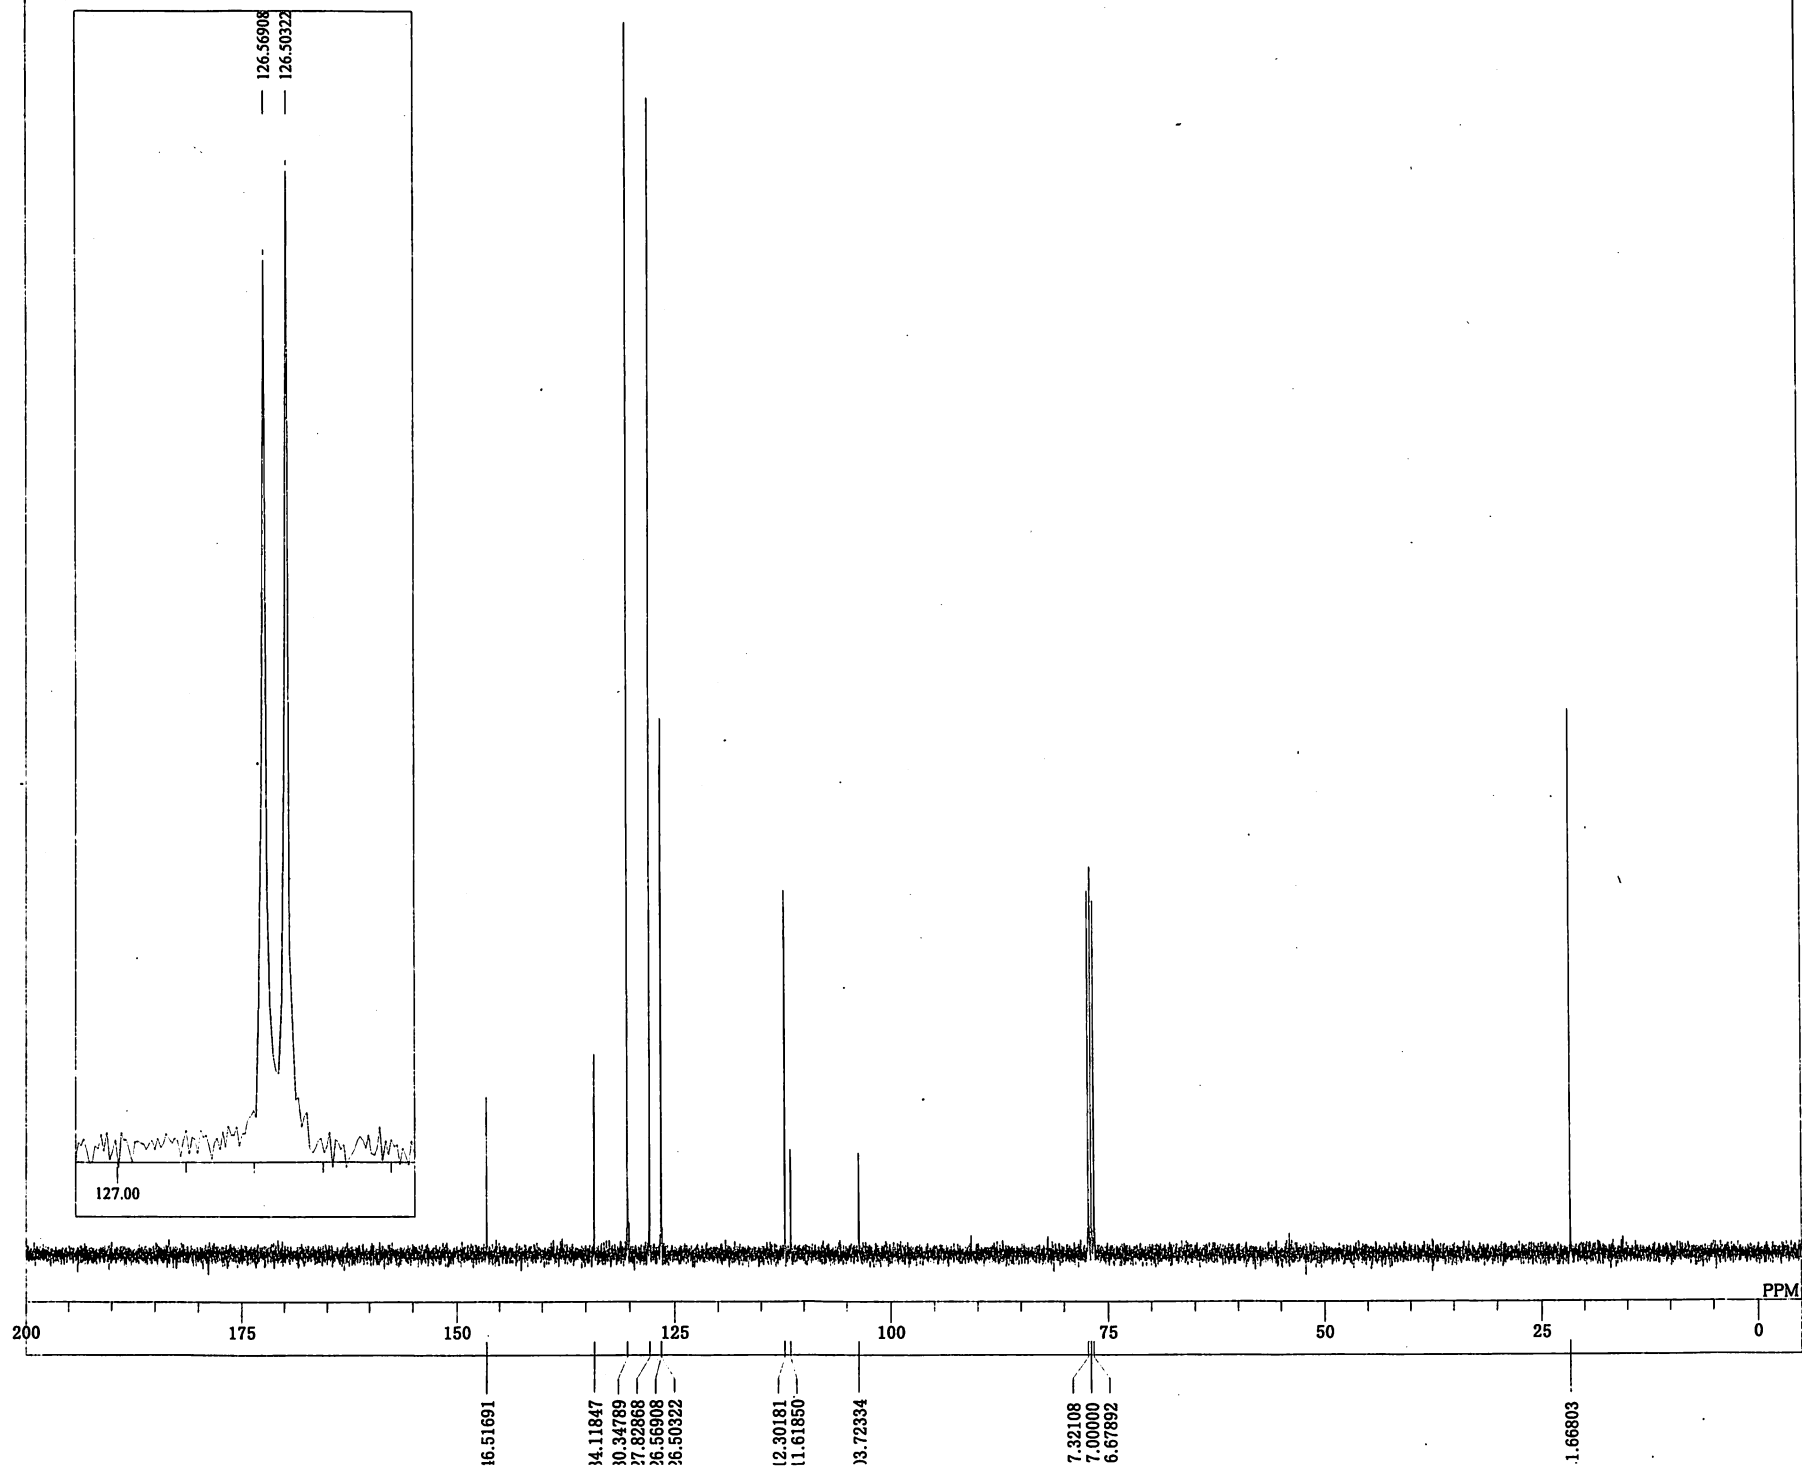

DFILE \_DEFAULT.ALS  
COMNT Exp-305(1)-13C  
DATIM Mon Aug 22 13:41:05 2011  
OBNUC 13C  
EXMOD BCM  
OBFRQ 100.40 MHz  
OBSET 125.00 KHz  
OBFIN 10500.00 Hz  
POINT 32768  
FREQU 27118.64 Hz  
SCANS 256  
ACQTM 1.2083 sec  
PD 1.7920 sec  
PW1 4.50 usec  
IRNUC 1H  
CTEMP 28.3 c  
SLVNT CDCL3  
EXREF 77.00 ppm  
BF 0.10 Hz  
RGAIN 30

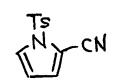

Exp-384(2)

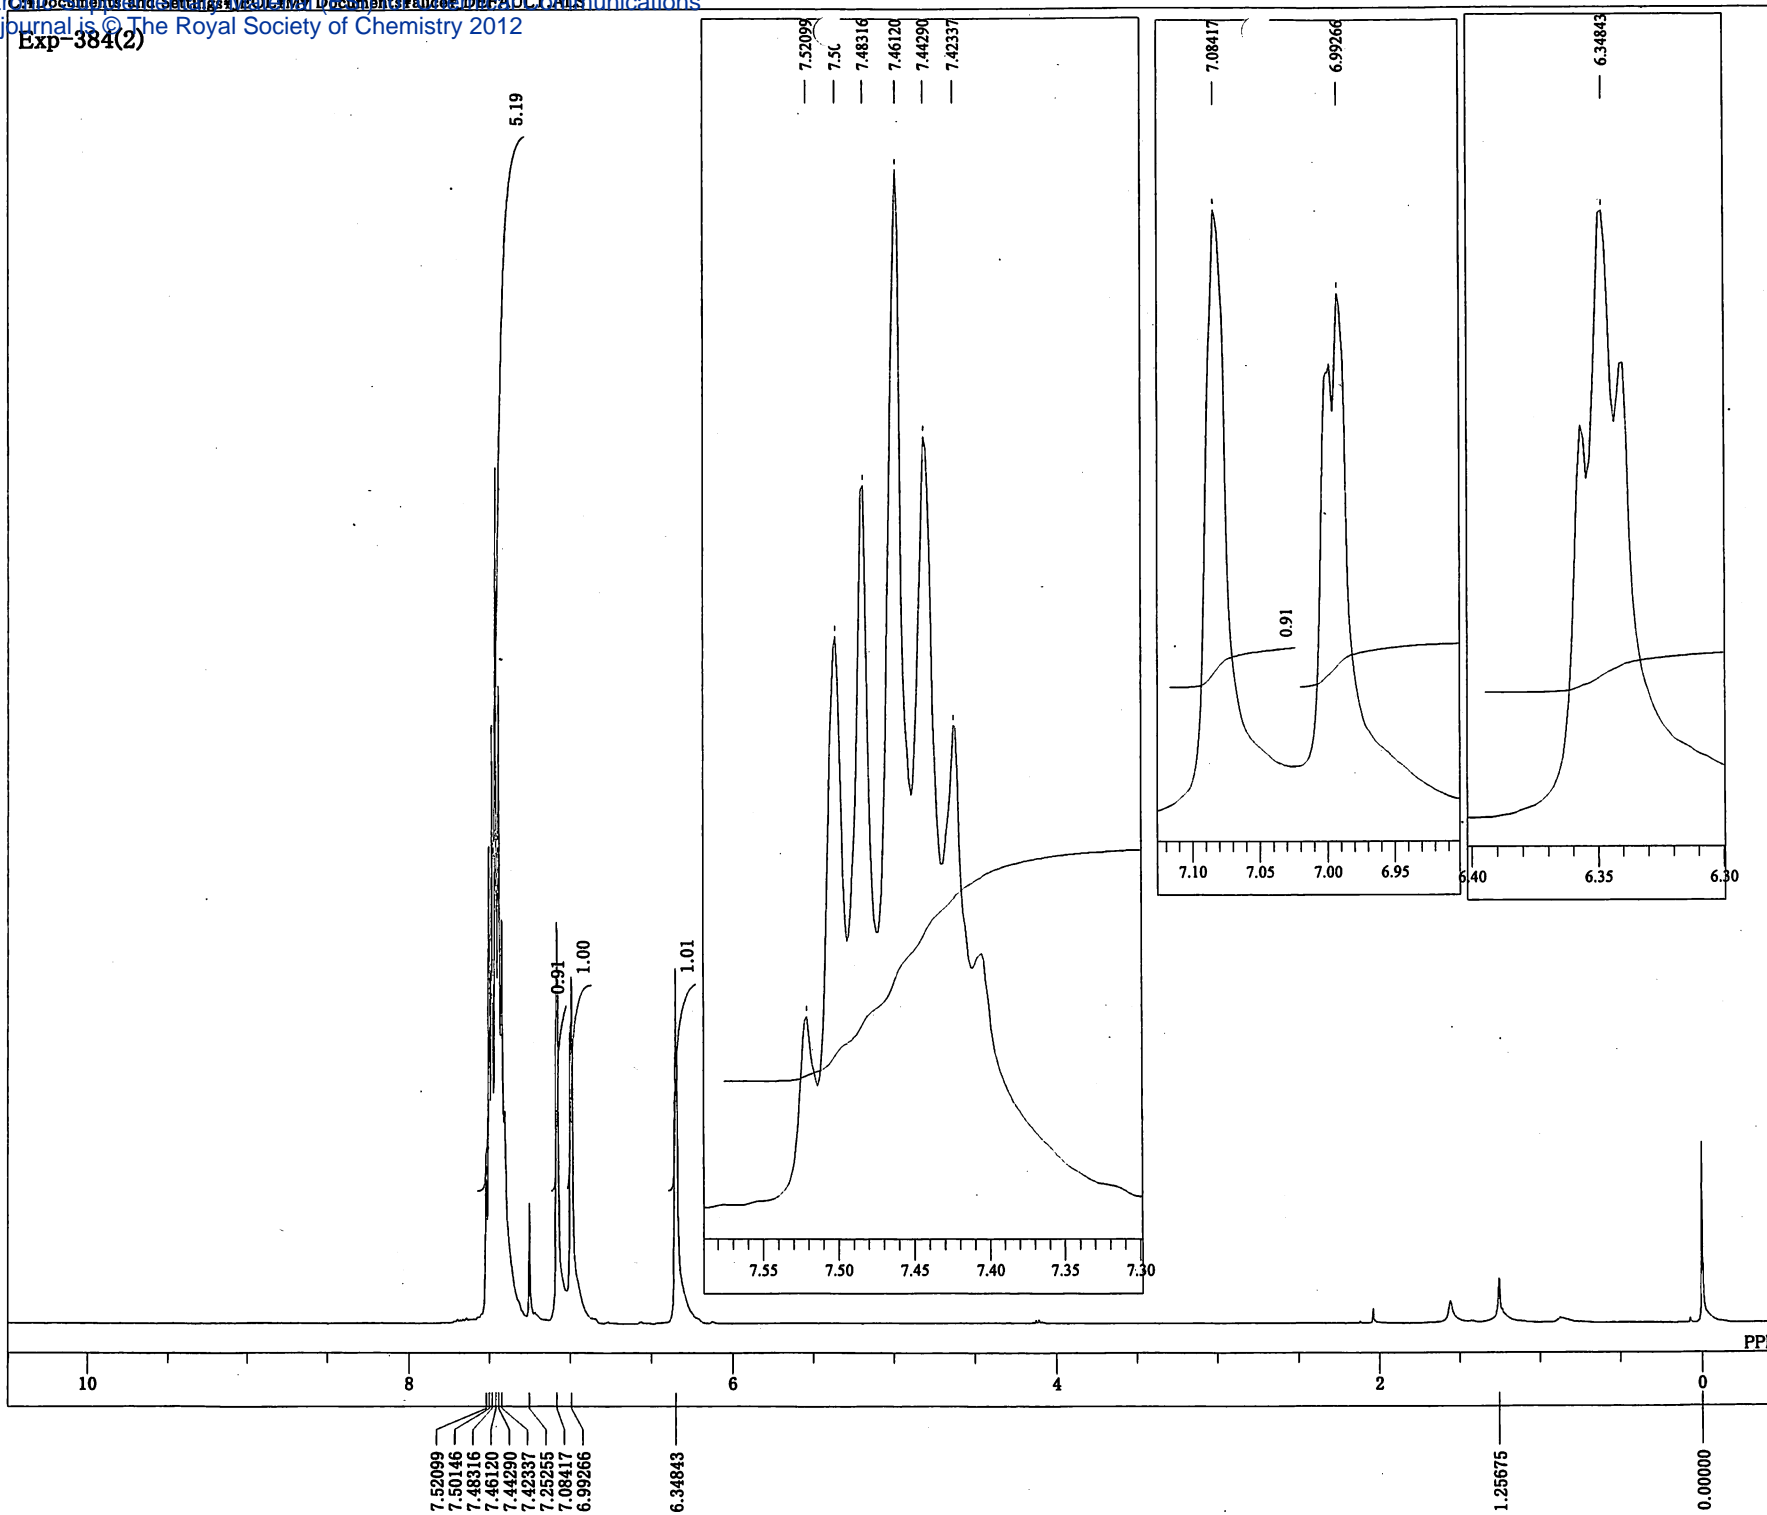

DEFAULT.ALS  
Exp-384(2)  
Tue Nov 15 16:29:54 2011  
1H  
NON  
399.65 MHz  
124.00 KHz  
10500.00 Hz  
16384  
7992.01 Hz  
16  
2.0501 sec  
2.9500 sec  
7.20 usec  
1H  
28.9 c  
CDCL3  
0.00 ppm  
1.00 Hz  
16  
RGAIN

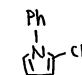



Exp-384(2)-13C

DFILE \_DEFAULT.ALS  
COMNT Exp-384(2)-13C  
DATIM Tue Nov 15 17:51:08 2011  
OBNUC 13C  
EXMOD BCM  
OBFREQ 75.45 MHz  
OBSET 124.00 KHz  
OBFIN 1840.00 Hz  
POINT 32768  
FREQU 20356.23 Hz  
SCANS 700  
ACQTM 1.6097 sec  
PD 1.3900 sec  
PW1 4.50 usec  
IRNUC 1H  
CTEMP 25.1 c  
SLVNT CDCL3  
EXREF 77.00 ppm  
BF 1.00 Hz  
RGAIN 28

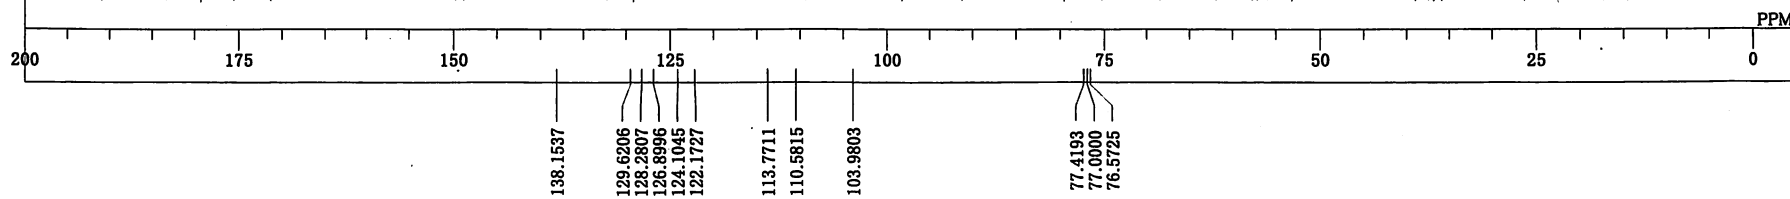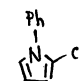

Exp-328000

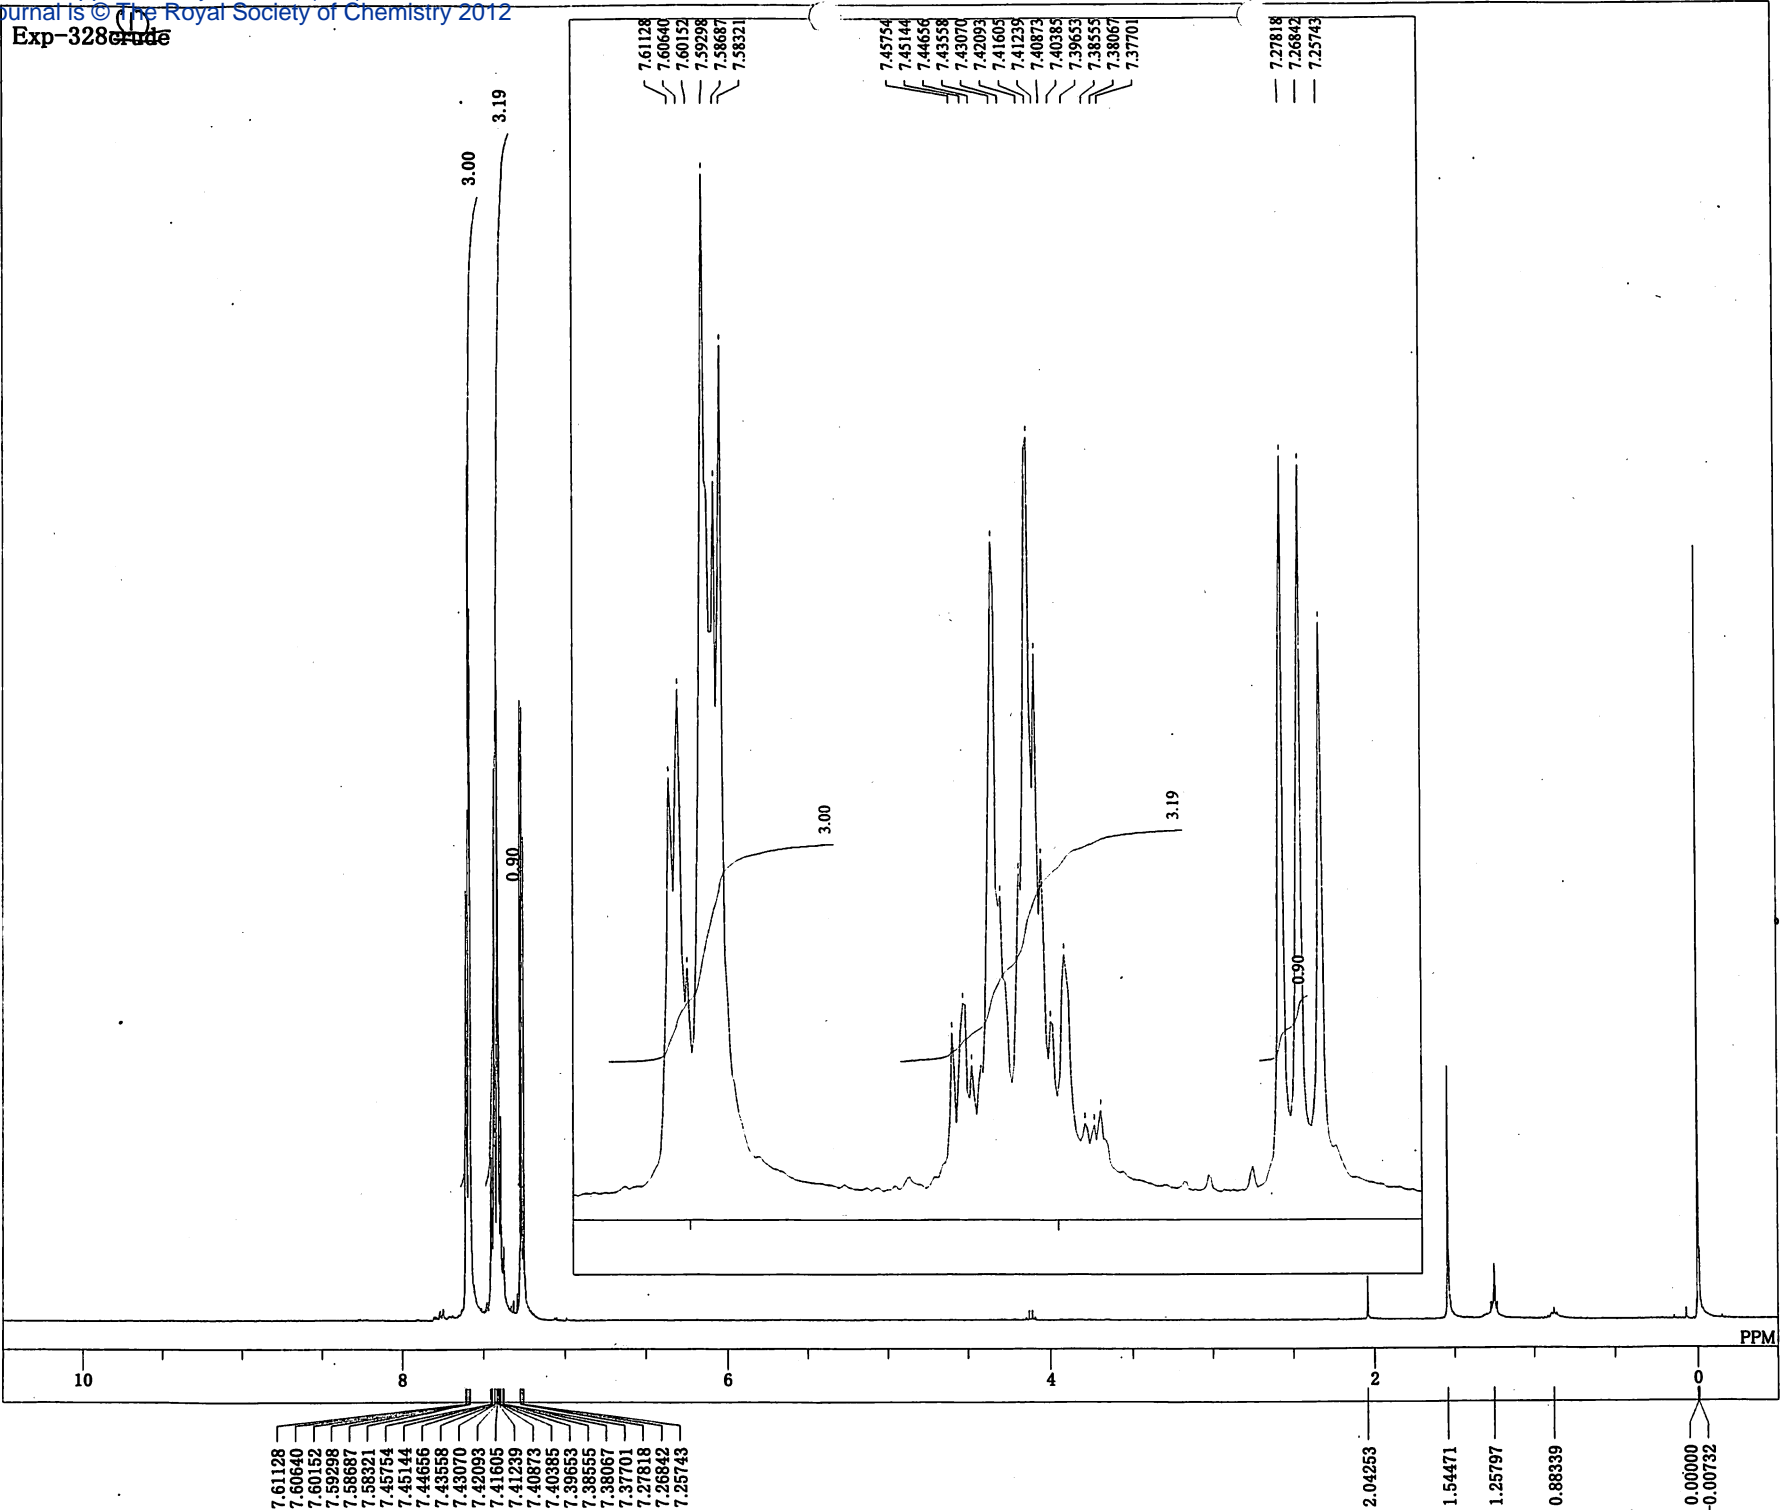

DFILE DEFAULT.ALS  
COMT Exp-328000(1)  
DATIM Fri Sep 02 21:22:16 2011  
OBNUC 1H  
EXMOD NON  
OBFRQ 399.65 MHz  
OBSFQ 124.00 KHz  
OBFIN 10500.00 Hz  
POINT 16384  
FREQU 7992.01 Hz  
SCANS 16  
ACQTM 2.0501 sec  
PD 2.9500 sec  
PW1 7.20 usec  
IRNUC 1H  
CTEMP 29.7 c  
SLVNT CDCL3  
EXREF 0.00 ppm  
BF 0.20 Hz  
RGAIN 19

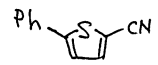

Exp-328(1)-13C

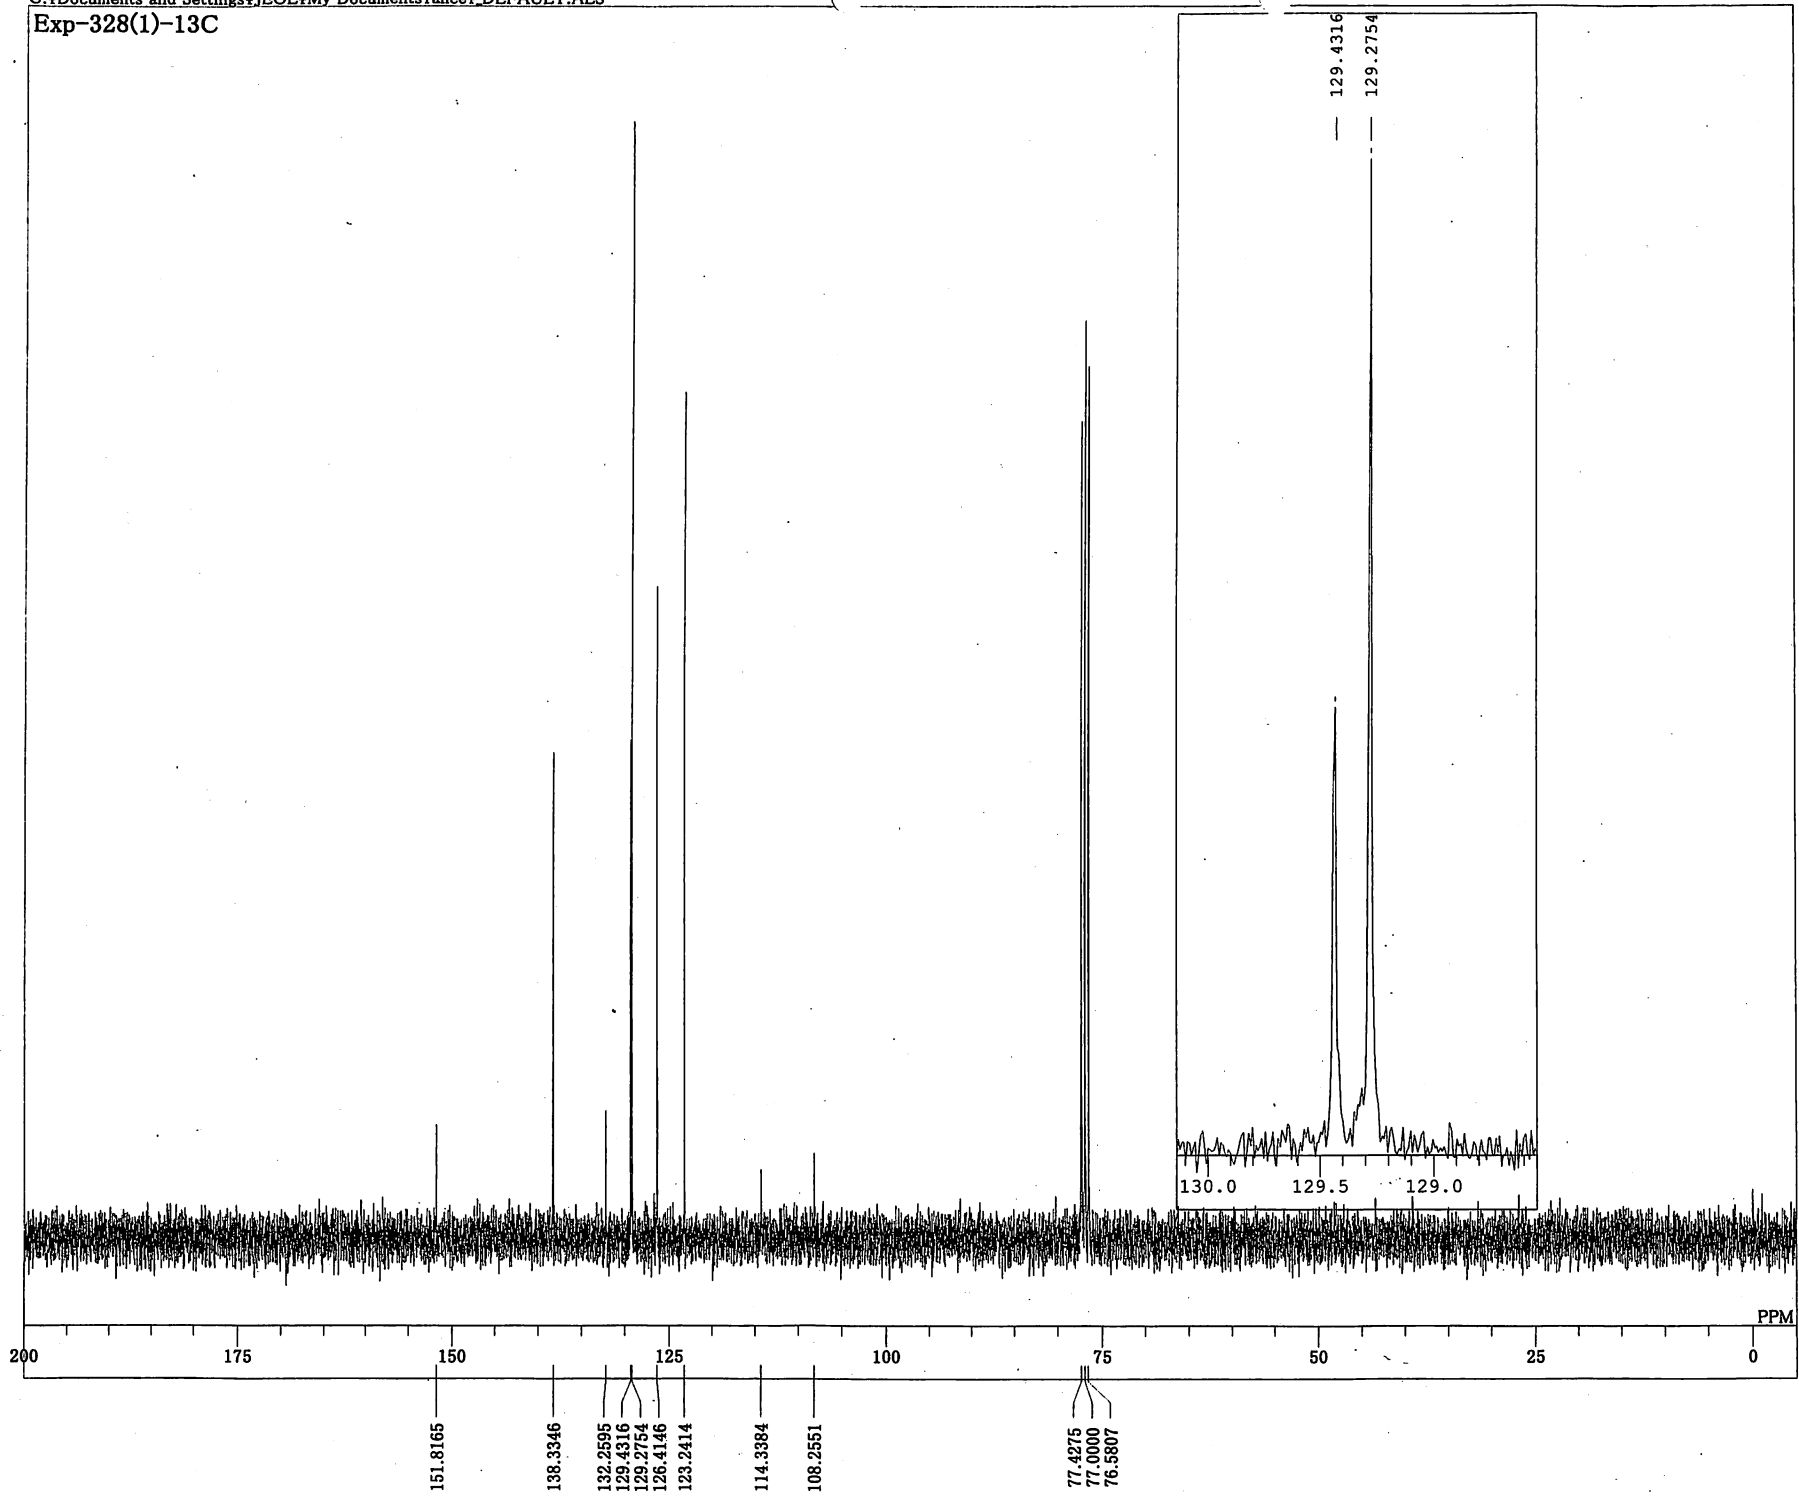

DFILE \_DEFAULT.ALS  
Exp-328(1)-13C  
Fri Sep 02 22:32:40 2011  
13C  
EXMOD BCM  
OBFRQ 75.45 MHz  
OBSET 124.00 KHz  
OBFIN 1840.00 Hz  
POINT 32768  
FREQU 20356.23 Hz  
SCANS 512  
ACQTM 1.6097 sec  
PD 1.3900 sec  
PW1 4.50 usec  
IRNUC 1H  
CTEMP 25.9 c  
SLVNT CDCL3  
EXREF 77.00 ppm  
BF 0.10 Hz  
RGAIN 29

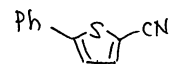

Exp-408(1)

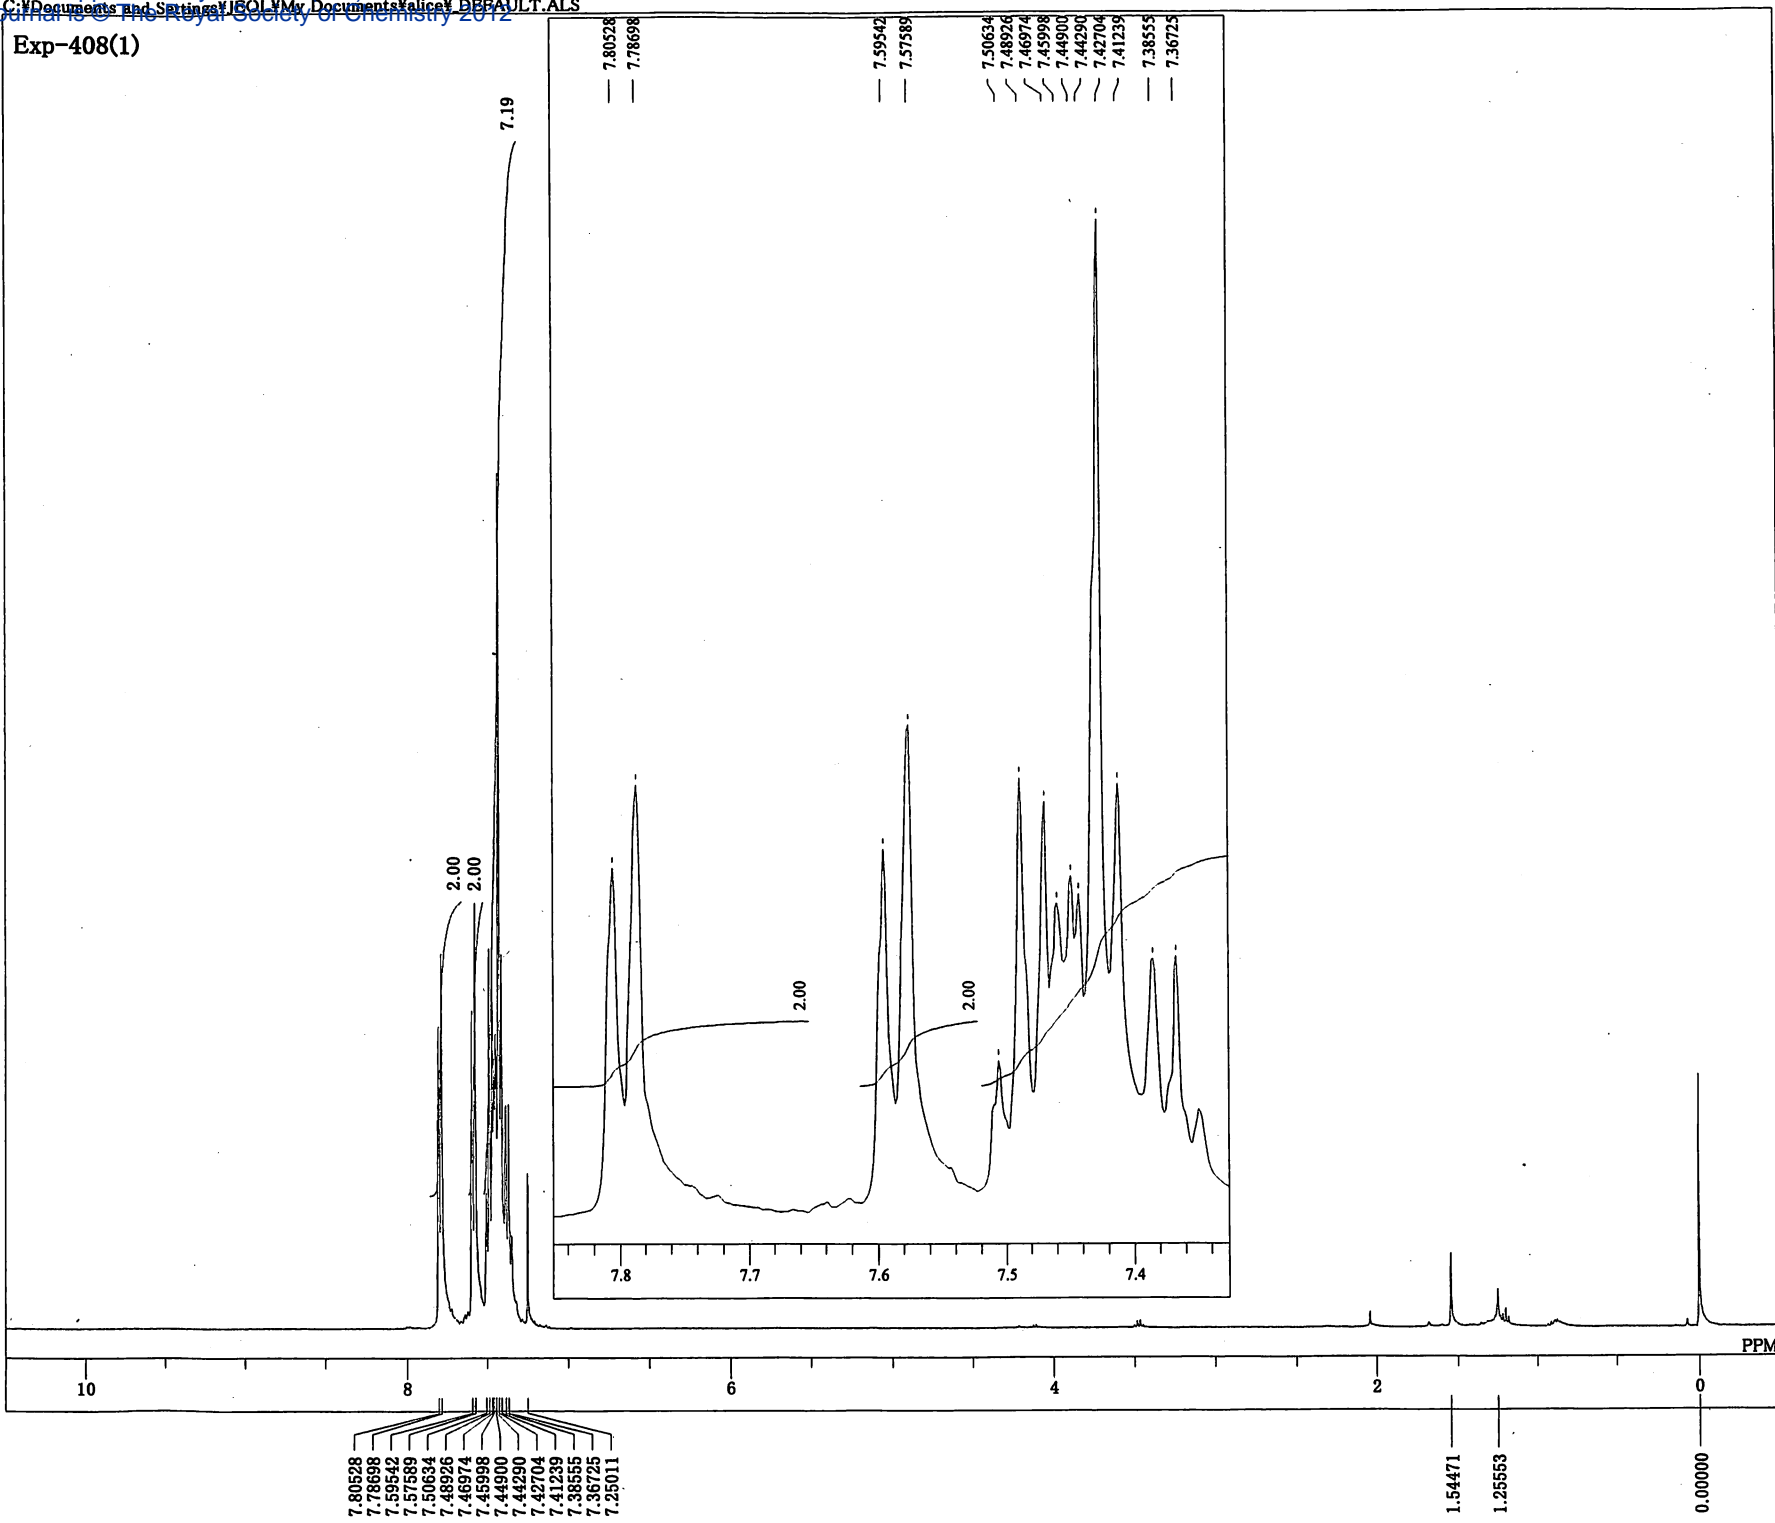

DFILE \_DEFAULT.ALS  
COMNT Exp-408(1)  
DATIM Wed Nov 16 19:22:17 2011  
OBNUC 1H  
EXMOD NON  
OBFREQ 399.65 MHz  
OBSET 124.00 KHz  
OBFIN 10500.00 Hz  
POINT 16384  
FREQU 7992.01 Hz  
SCANS 16  
ACQTM 2.0501 sec  
PD 2.9500 sec  
PW1 7.20 usec  
IRNUC 1H  
CTEMP 28.8 c  
SLVNT CDCL3  
EXREF 0.00 ppm  
BF 0.12 Hz  
RGAIN 17

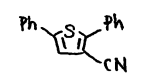

Exp-408(1)-13C

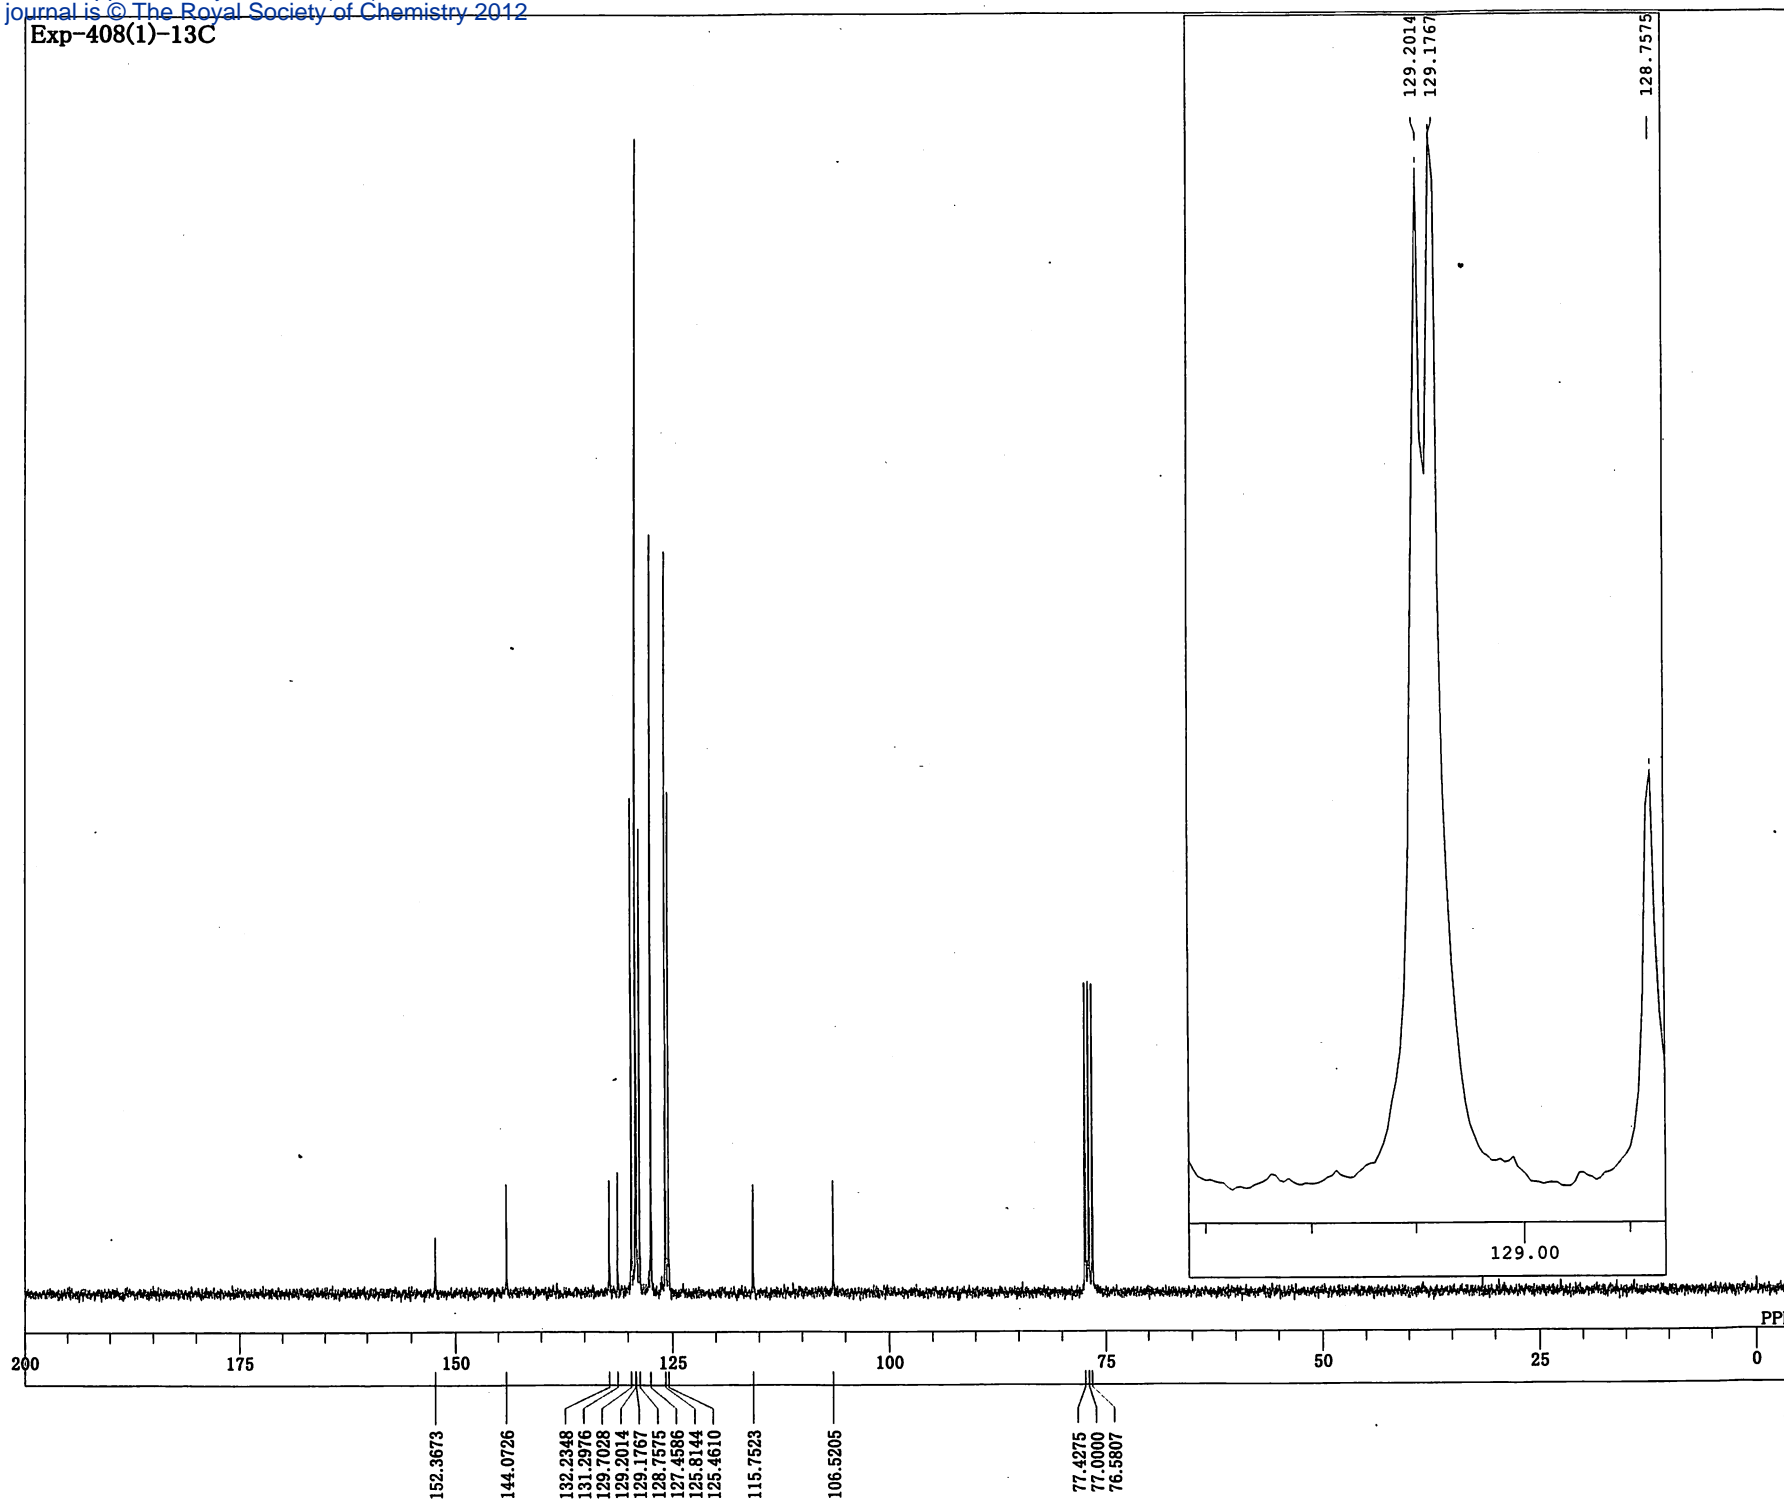

DFILE DEFAULT.ALS  
COMNT Exp-408(1)-13C  
DATIM Wed Nov 16 20:55:26 2011  
OBNUC 13C  
EXMOD BCM  
OBFRQ 75.45 MHz  
OBSET 124.00 KHz  
OBFIN 1840.00 Hz  
POINT 32768  
FREQU 20356.23 Hz  
SCANS 1000  
ACQTM 1.6097 sec  
PD 1.3900 sec  
PW1 4.50 usec  
IRNUC 1H  
CTEMP 25.2 c  
SLVNT CDCL3  
EXREF 77.00 ppm  
BF 1.00 Hz  
RGAIN 28

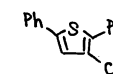

Exp-385(1)

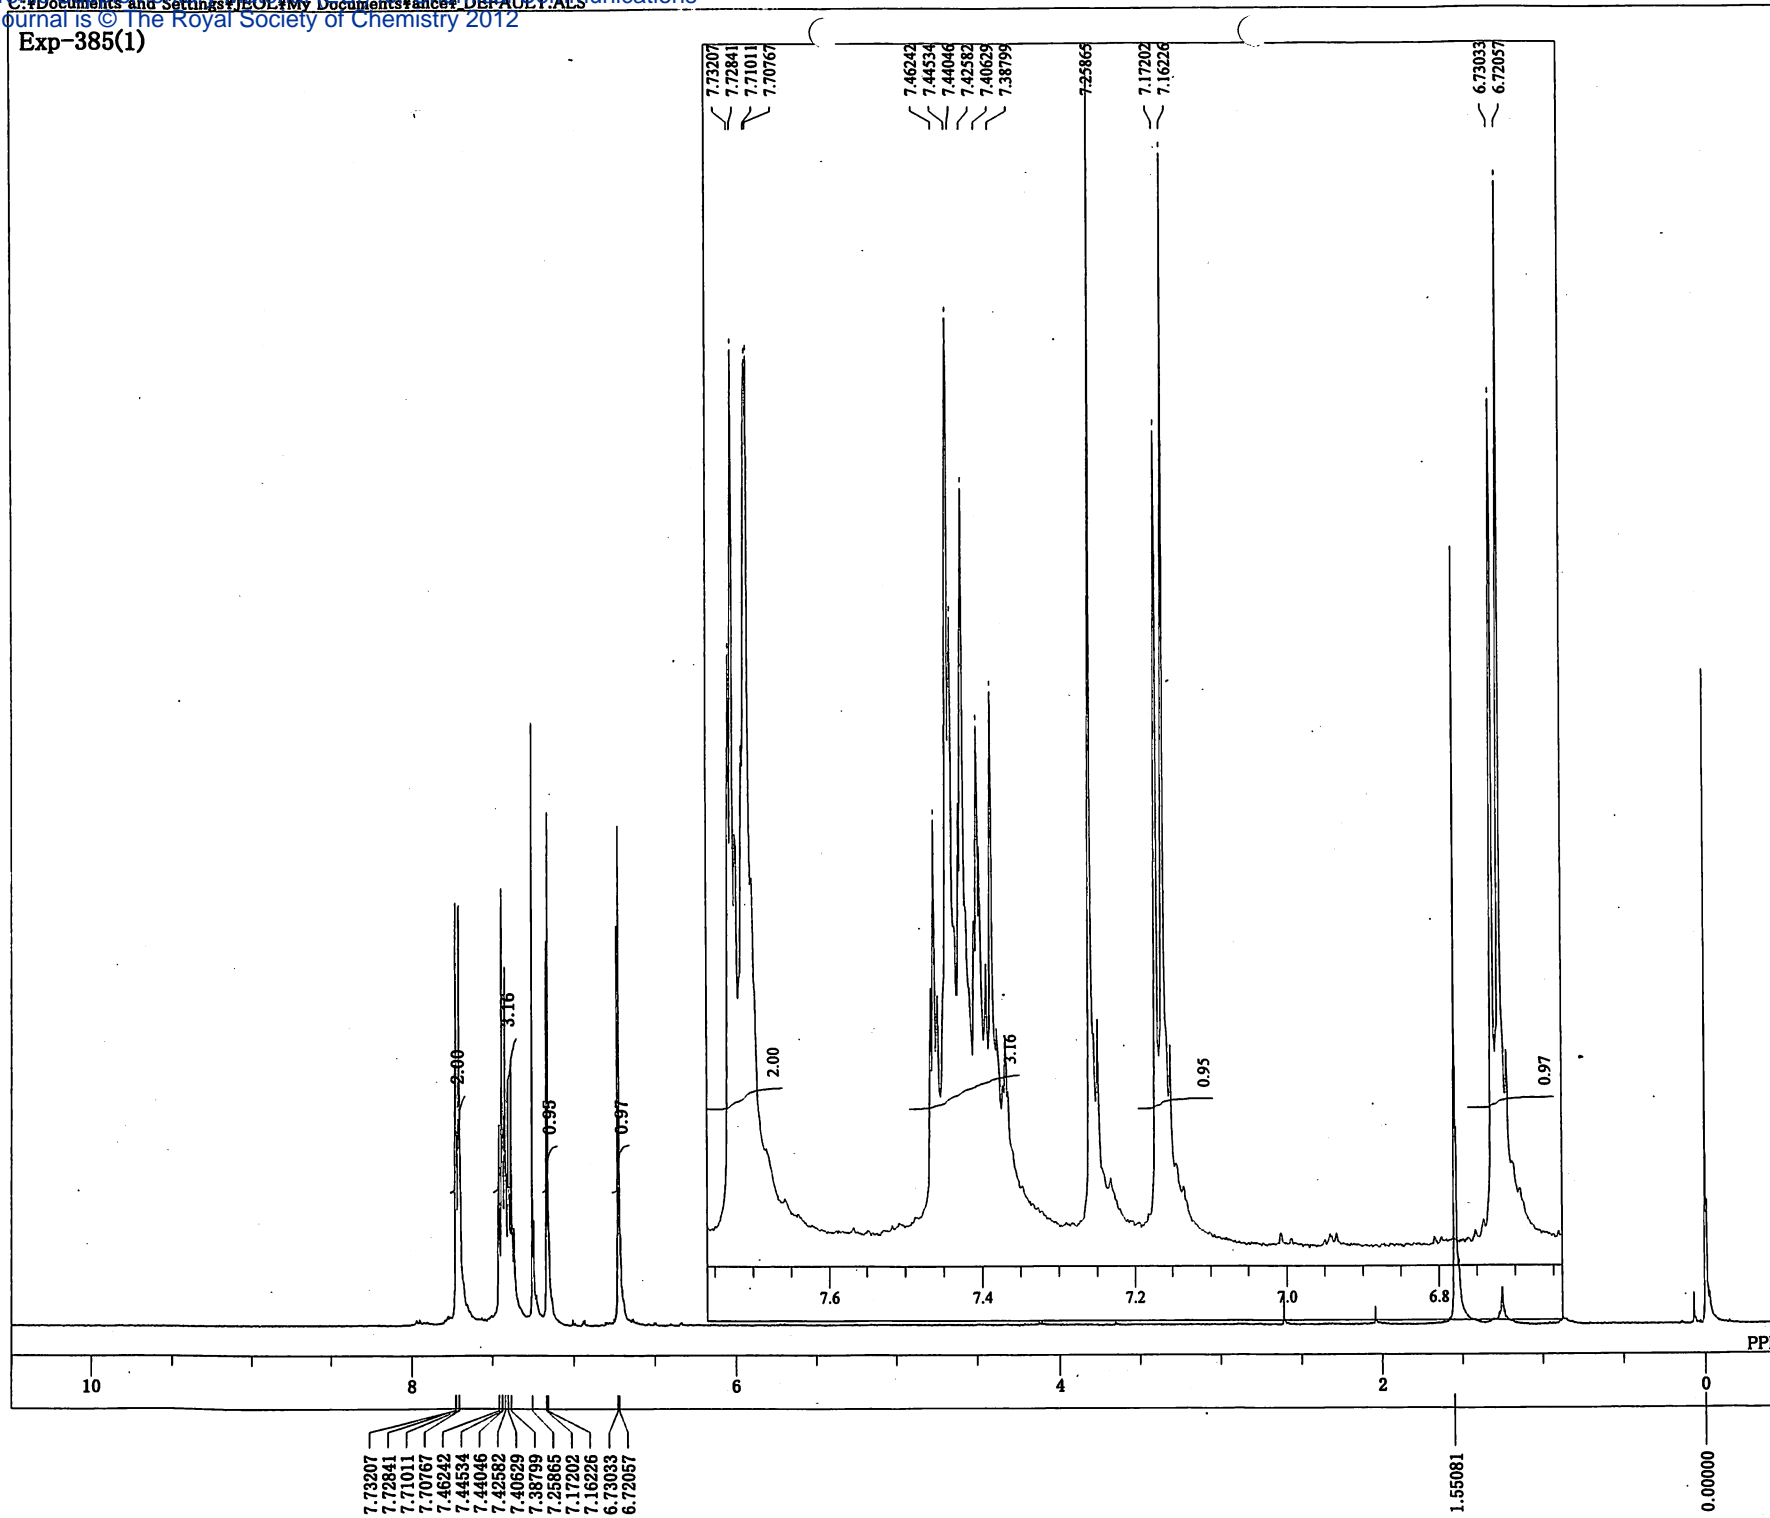

DFILE DEFAULT.ALS  
COMNT Exp-385(1)  
DATIM Tue Oct 25 23:17:03 2011  
OBNUC 1H  
EXMOD NON  
OBFRQ 399.65 MHz  
OBSET 124.00 KHz  
OBFIN 10500.00 Hz  
POINT 16384  
FREQU 7992.01 Hz  
SCANS 16  
ACQTM 2.0501 sec  
PD 2.9500 sec  
PW1 7.20 usec  
IRNUC 1H  
CTEMP 29.3 c  
SLVNT CDCL3  
EXREF 0.00 ppm  
BF 0.12 Hz  
RGAIN 20

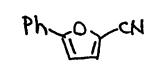

Exp-385(1)-13C

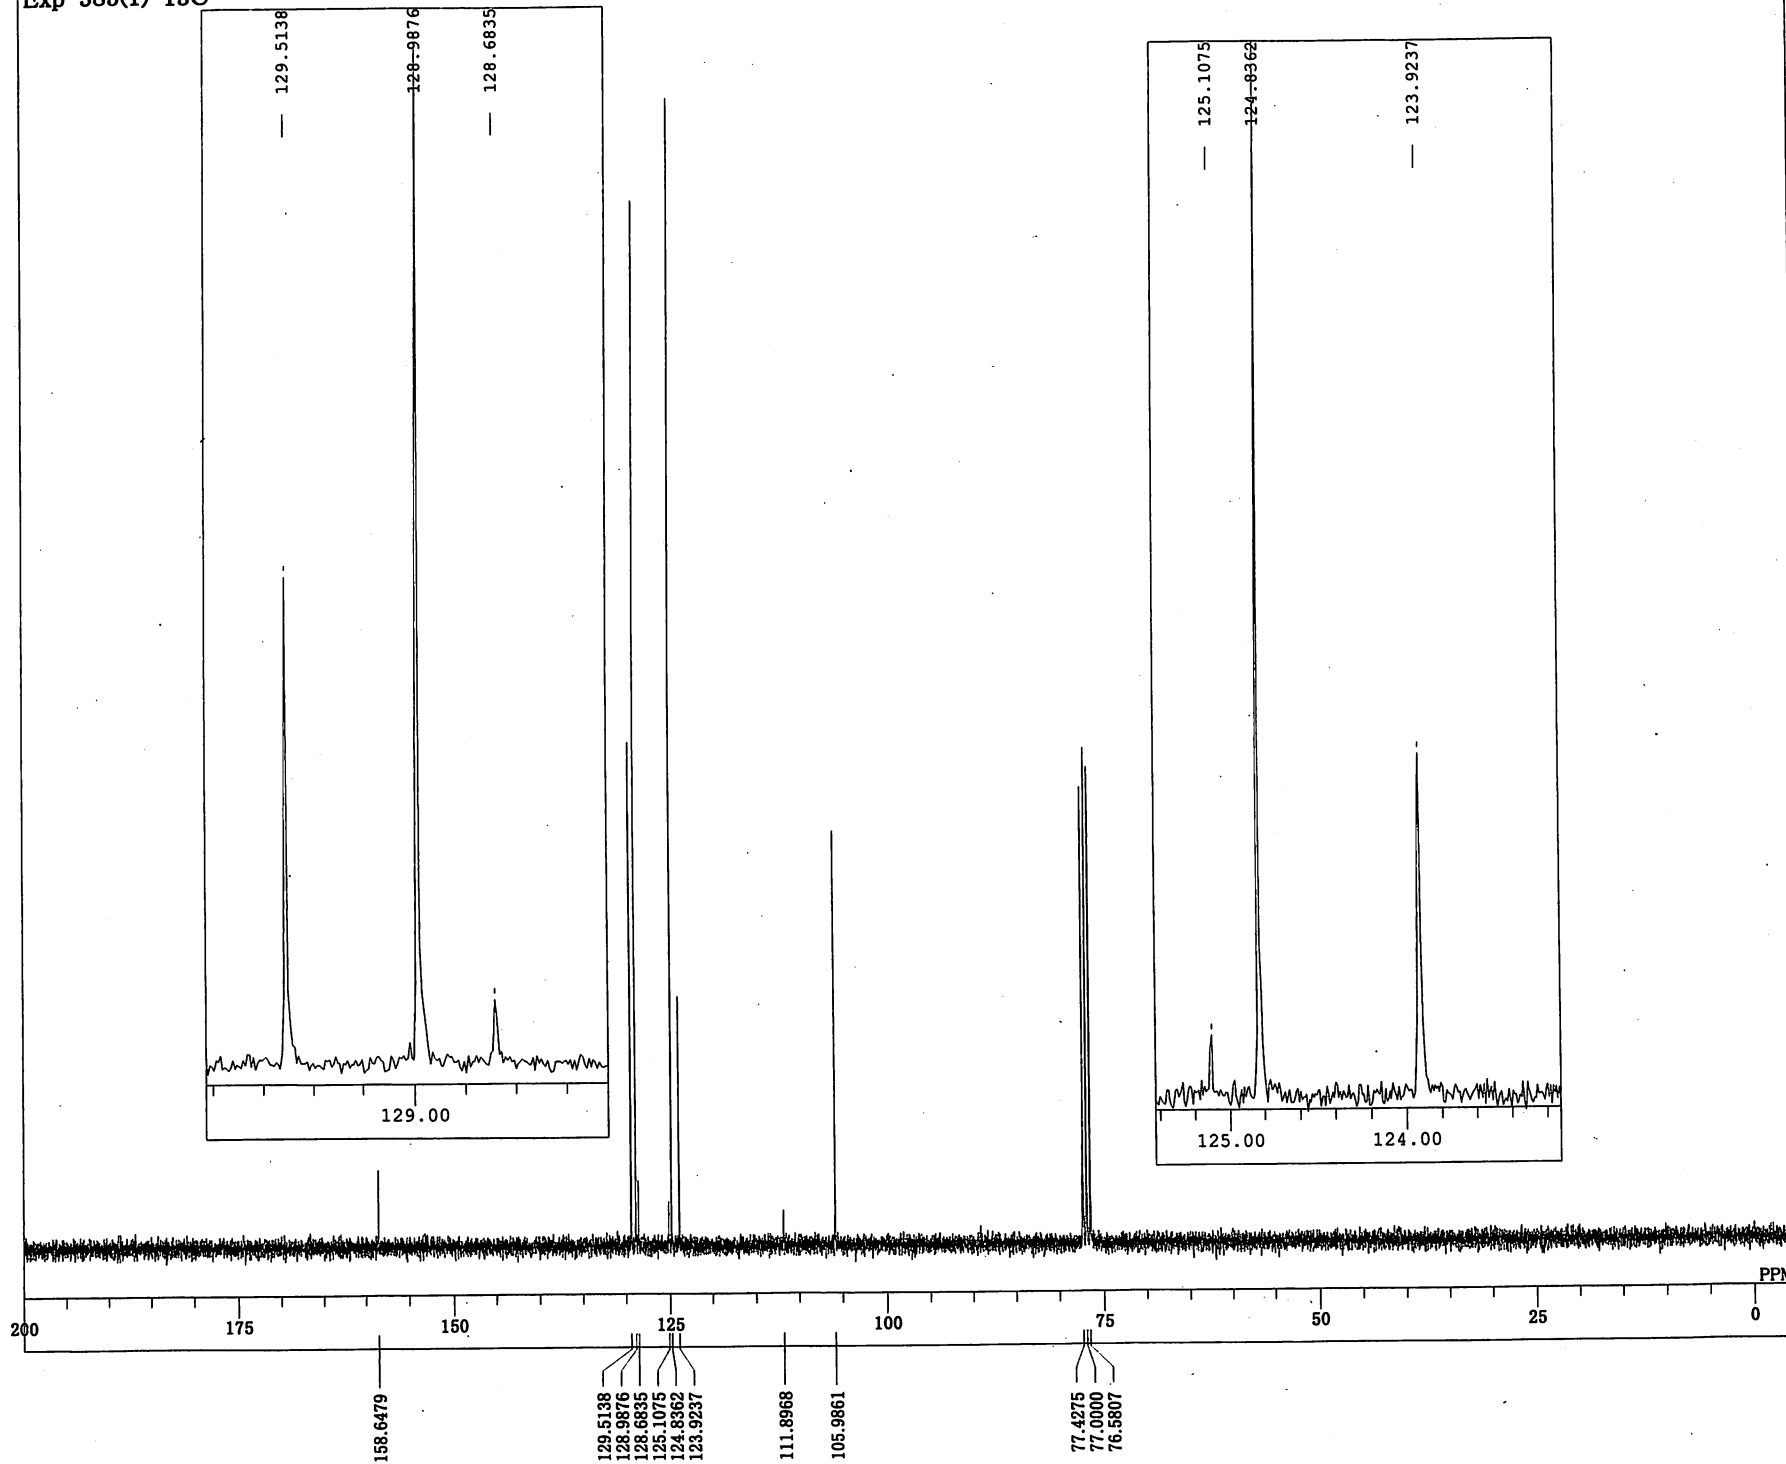

DFILE \_DEFAULT.ALS  
COMNT Exp-385(1)-13C  
DATIM Wed Oct 26 11:40:21 2011  
OBNUC 13C  
EXMOD BCM  
OBFRQ 75.45 MHz  
OBSET 124.00 KHz  
OBFIN 1840.00 Hz  
POINT 32768  
FREQU 20356.23 Hz  
SCANS 1024  
ACQTM 1.6097 sec  
PD 1.3900 sec  
PW1 4.50 usec  
IRNUC 1H  
CTEMP 25.0 c  
SLVNT CDCL3  
EXREF 77.00 ppm  
BF 0.10 Hz  
RGAIN 28

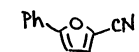

Exp-386(1)

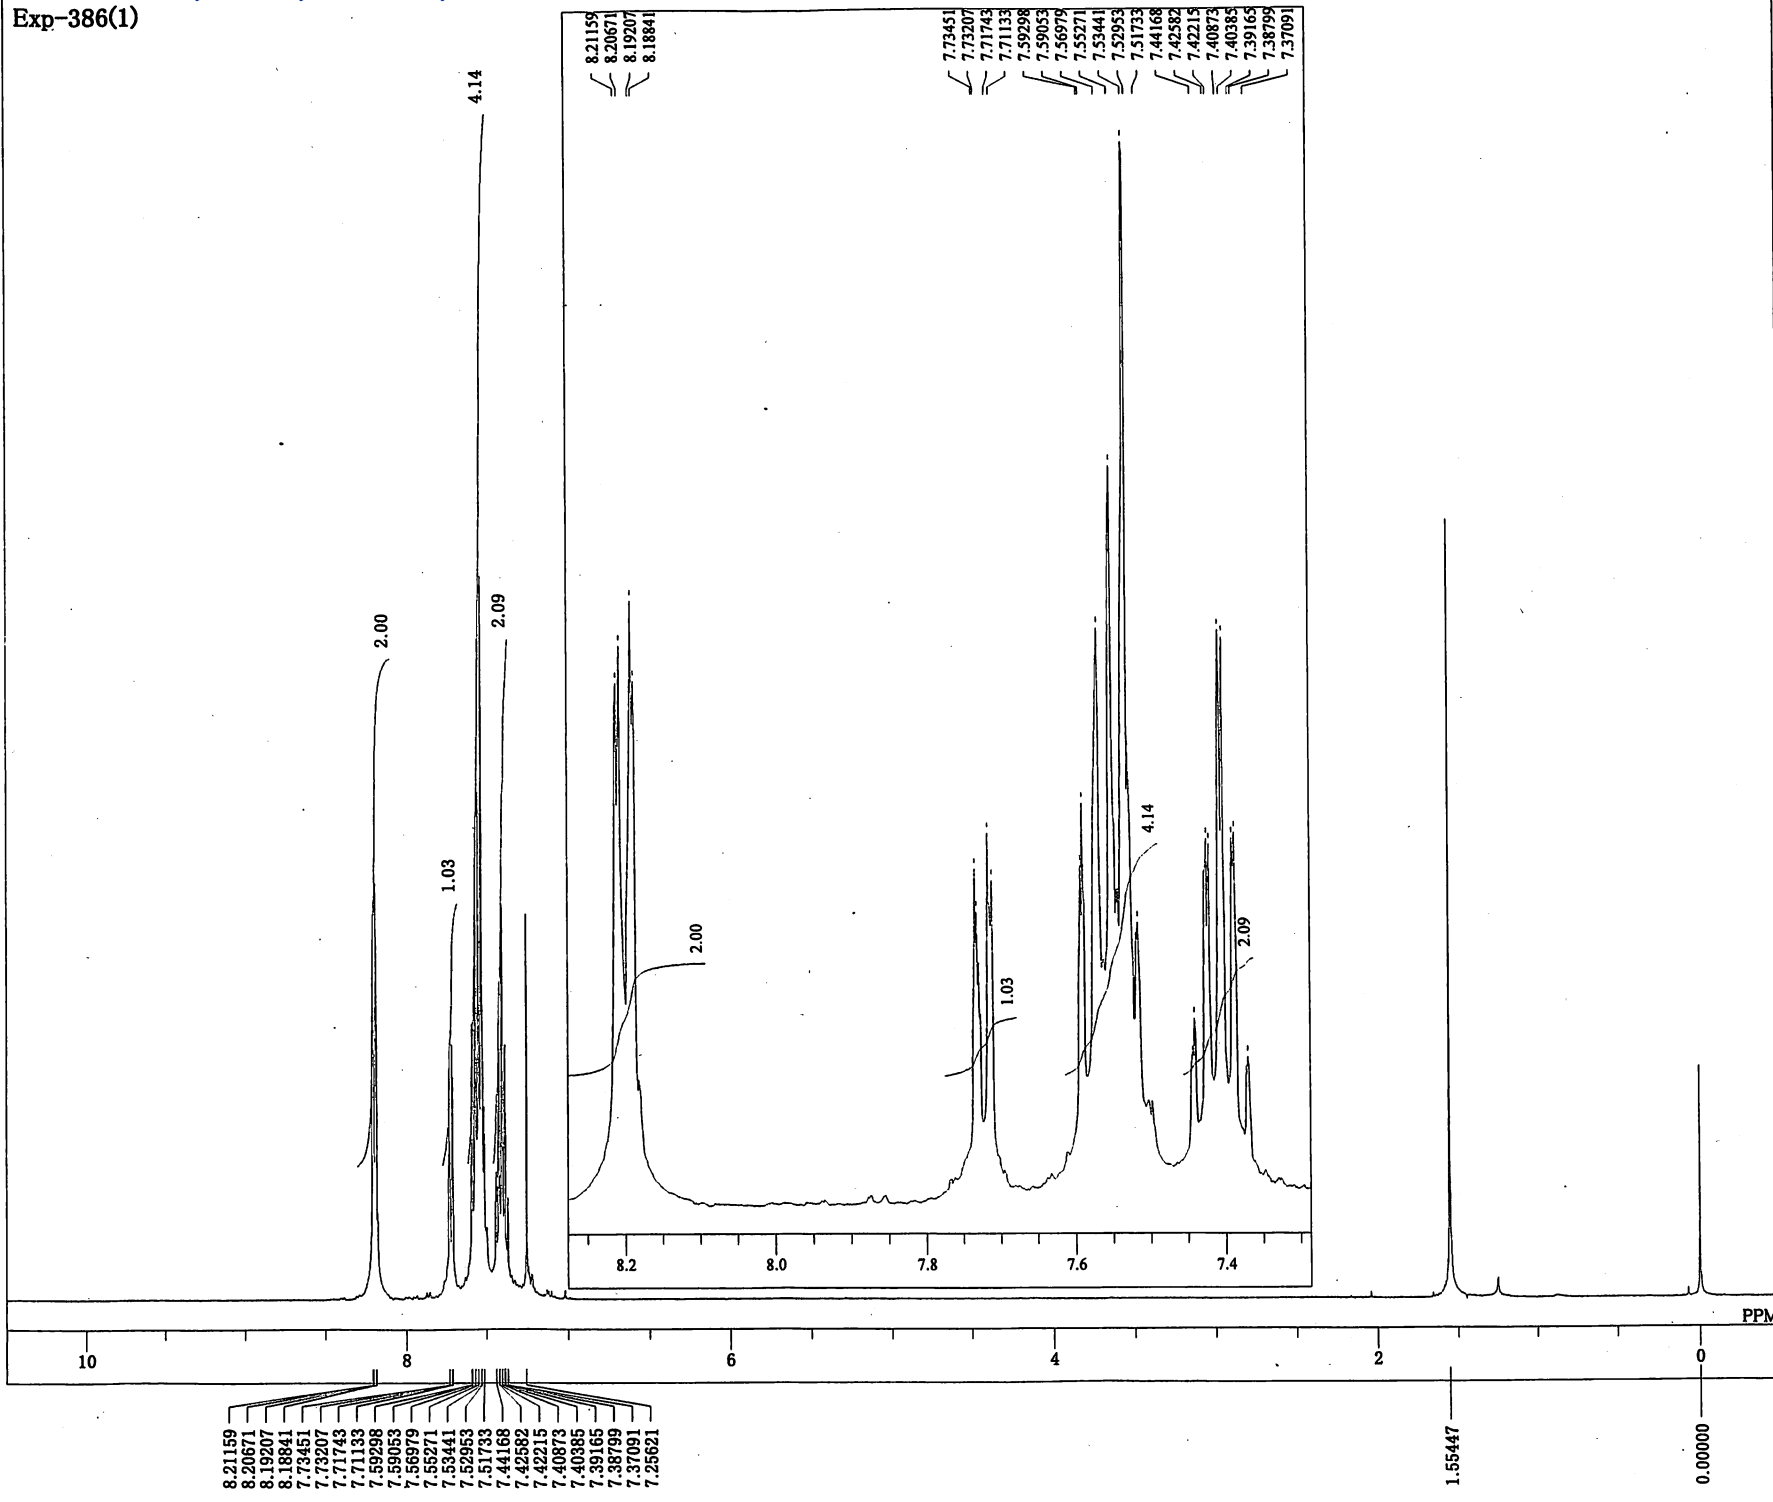

DFILE \_DEFAULT.ALS  
COMNT Exp-386(1)  
DATIM Wed Nov 02 10:54:18 2011  
OBNUC 1H  
EXMOD NON  
OBFRQ 399.65 MHz  
OBSET 124.00 KHz  
OBFIN 10500.00 Hz  
POINT 16384  
FREQU 7992.01 Hz  
SCANS 32  
ACQTM 2.0501 sec  
PD 2.9500 sec  
PW1 7.20 usec  
IRNUC 1H  
CTEMP 29.4 c  
SLVNT CDCL3  
EXREF 0.00 ppm  
BF 0.12 Hz  
RGAIN 19

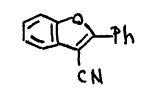



Exp-386(1)-13C

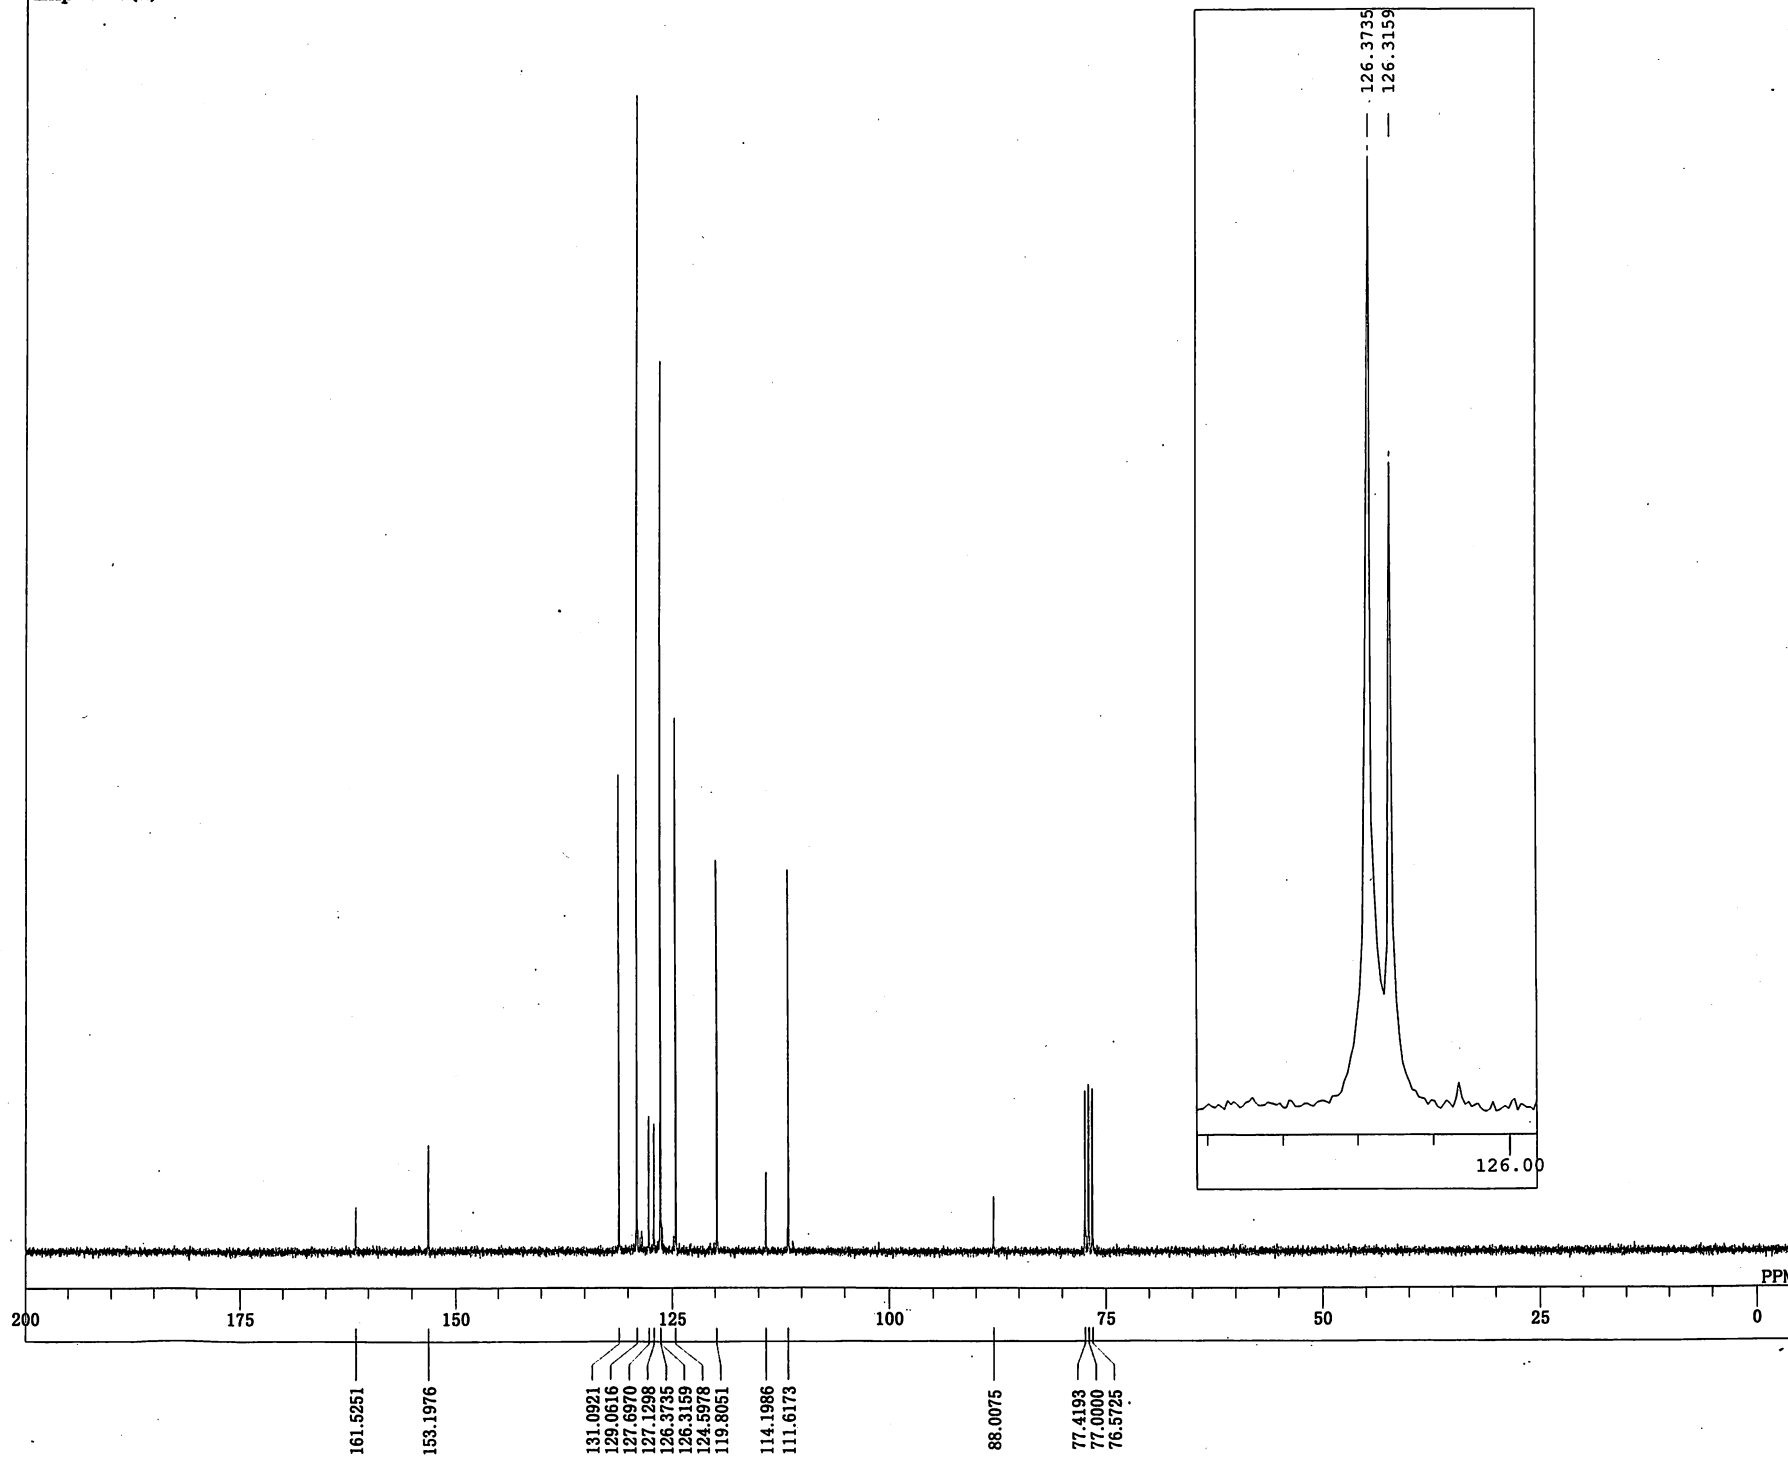

DFILE Exp-386(1)-13C.als  
COMNT Exp-386(1)-13C  
DATIM Wed Nov 02 12:46:45 2011  
OBNUC 13C  
EXMOD BCM  
OBFRQ 75.45 MHz  
OBSET 124.00 KHz  
OBRIN 1840.00 Hz  
POINT 32768  
FREQU 20356.23 Hz  
SCANS 800  
ACQTM 1.6097 sec  
PD 1.3900 sec  
PW1 4.50 usec  
IRNUC 1H  
CTEMP 25.4 c  
SLVNT CDCL3  
EXREF 77.00 ppm  
BF 0.12 Hz  
RGAIN 28

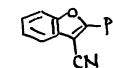

Exp-373(1)

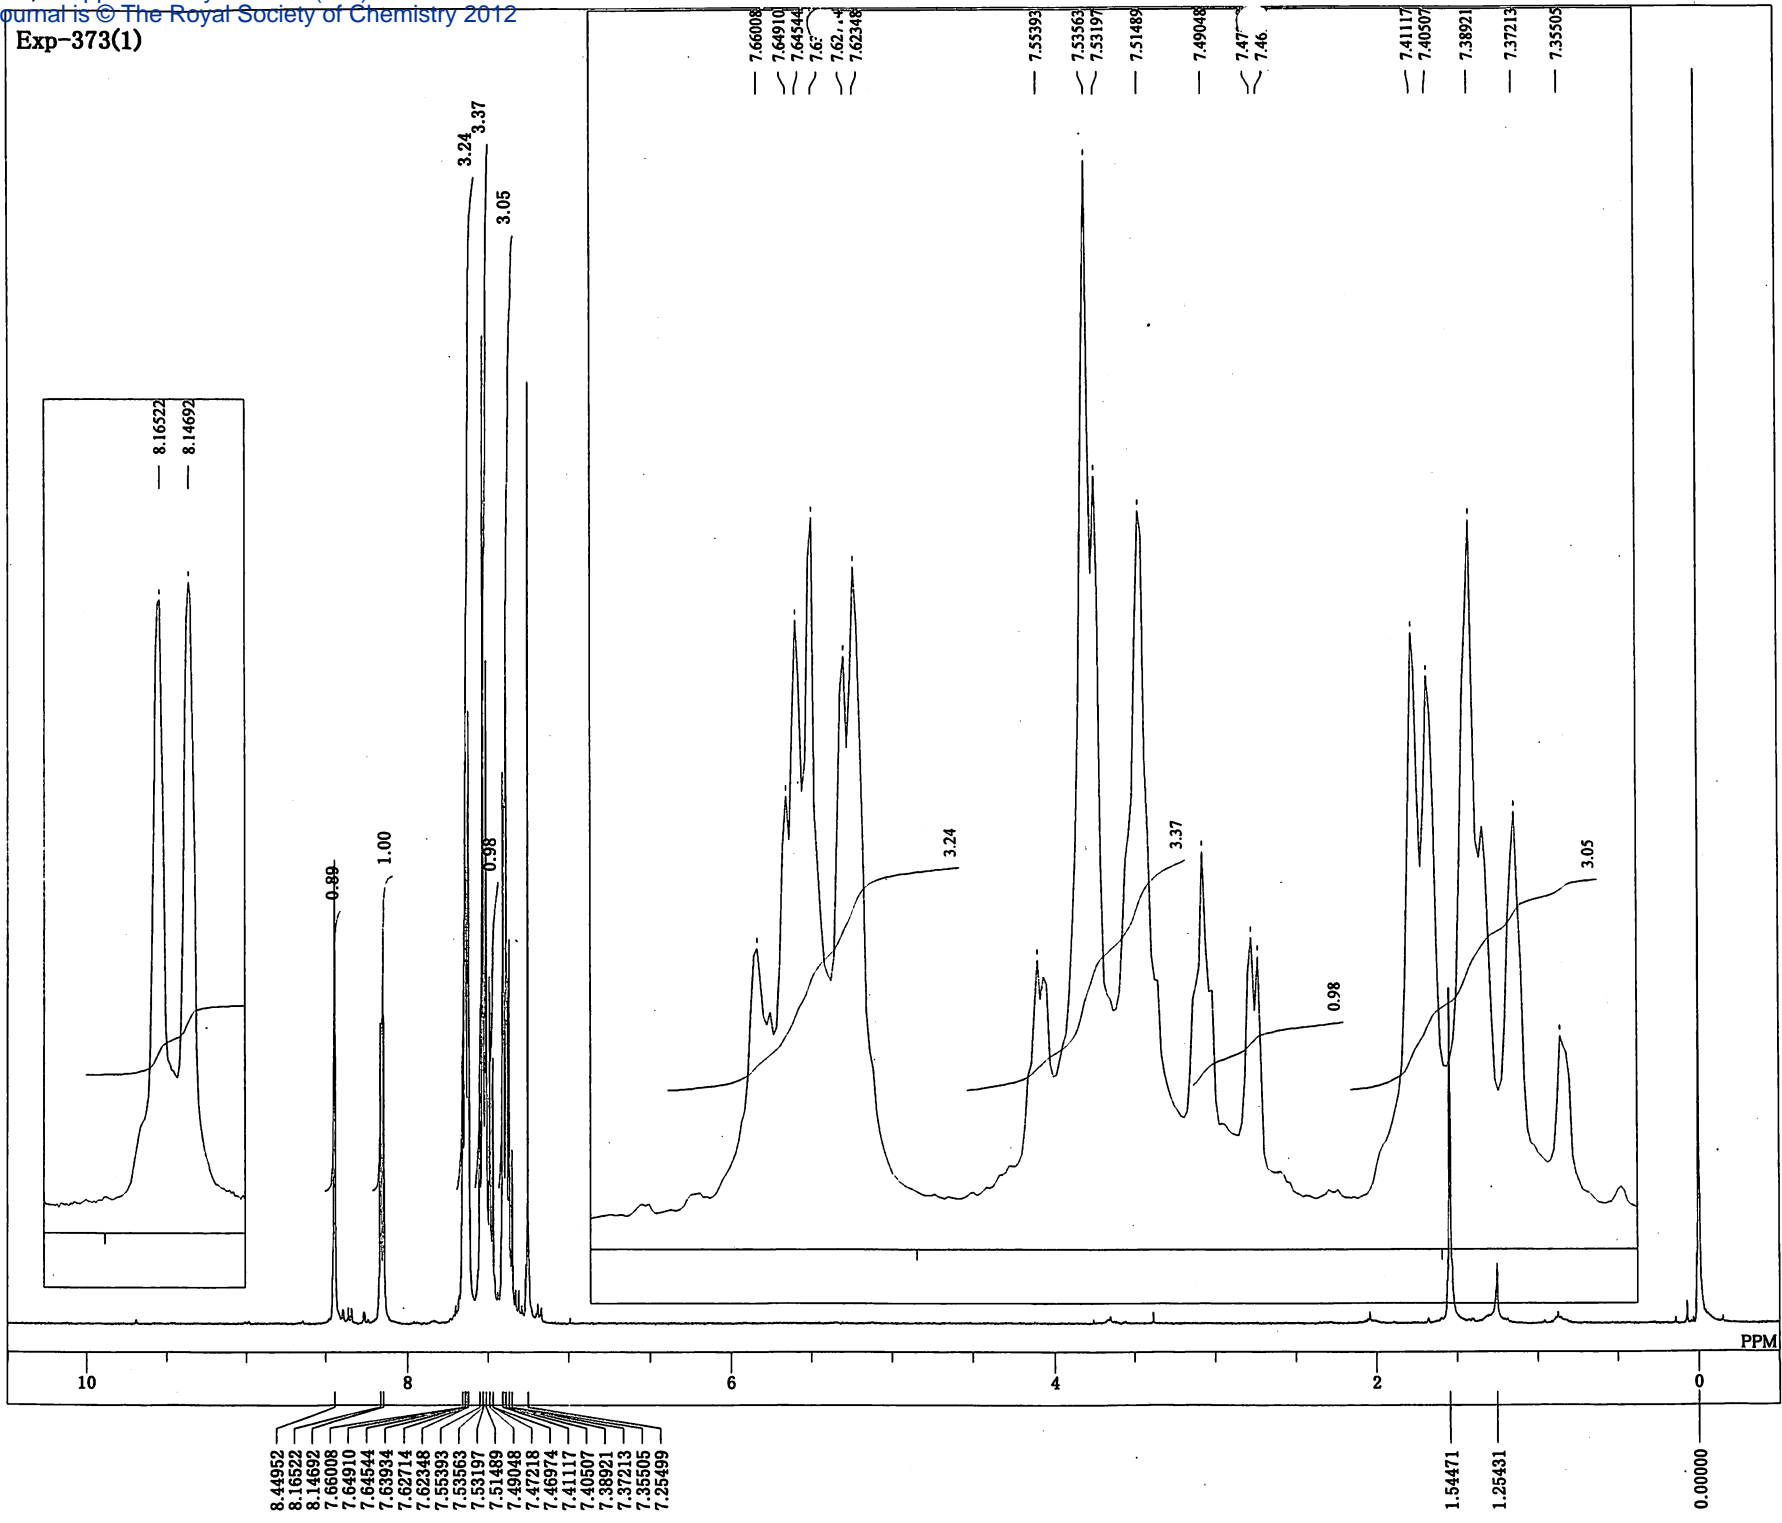

DFILE \_DEFAULT.ALS  
COMNT Exp-373(1)  
DATIM Thu Oct 06 20:00:19 2011  
OBNUC 1H  
EXMOD NON  
OBFREQ 399.65 MHz  
OBSET 124.00 KHz  
OBFIN 10500.00 Hz  
POINT 16384  
FRFQU 7992.01 Hz  
SCANS 16  
ACQTM 2.0501 sec  
PD 2.9500 sec  
PW1 7.20 usec  
IRNUC 1H  
CTEMP 29.2 c  
SLVNT CDCL3  
EXREF 0.00 ppm  
BF 0.12 Hz  
RGAIN 20

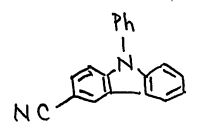

Exp-373(1)-13C

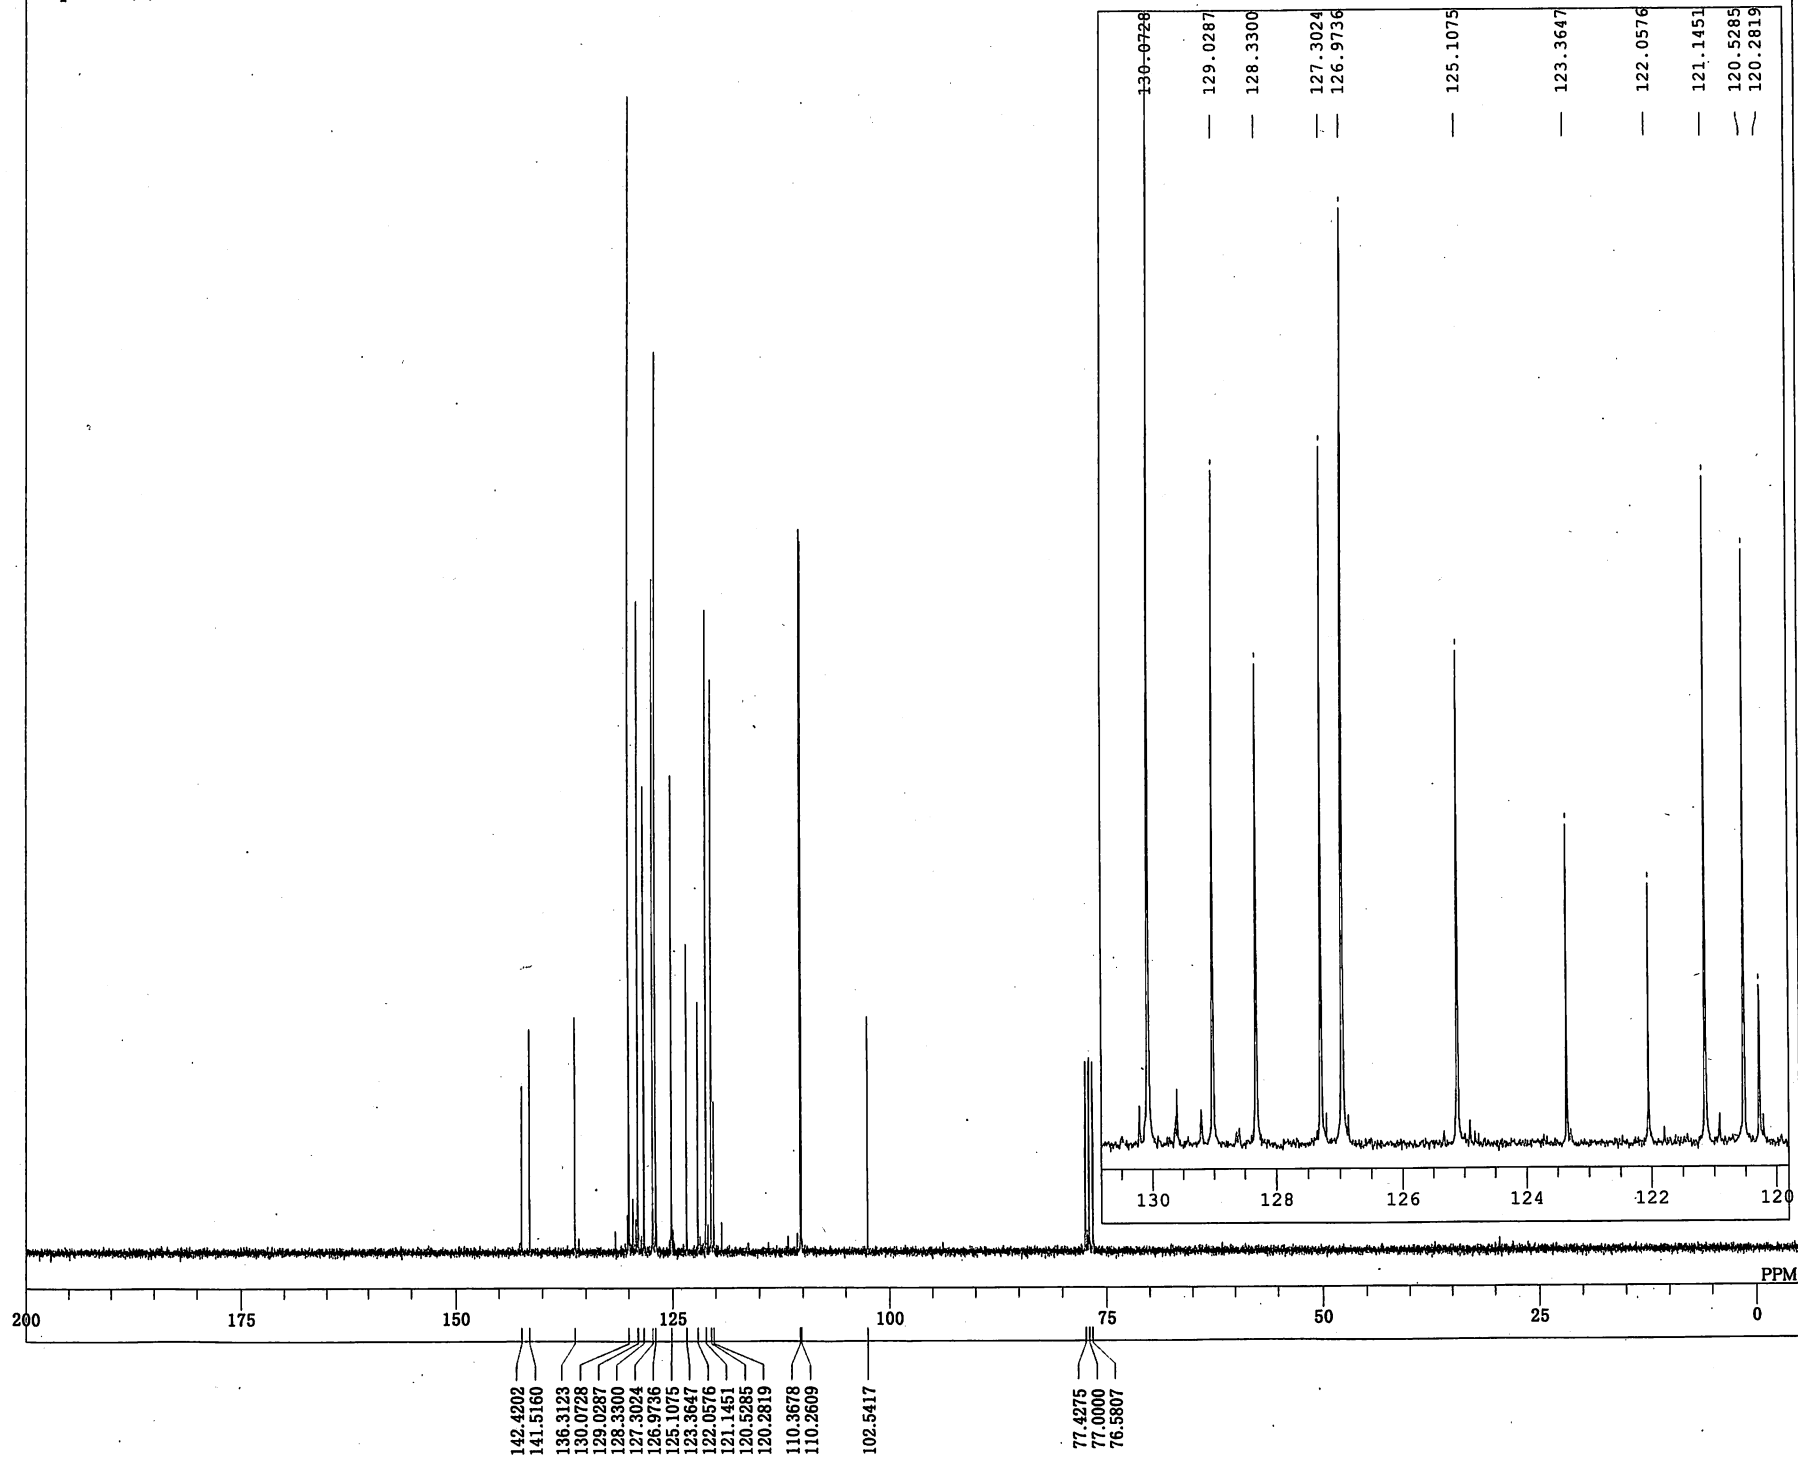

DEFAULT.ALS  
Exp-373(1)-13C  
Fri Oct 07 11:51:06 2011  
13C  
BCM  
OBFRQ 75.45 MHz  
OBSET 124.00 KHz  
OBFIN 1840.00 Hz  
POINT 32768  
FREQU 20356.23 Hz  
SCANS 1024  
ACQTM 1.6097 sec  
PD 1.3900 sec  
PW1 4.50 usec  
IRNUC 1H  
CTEMP 25.5 c  
SLVNT CDCL3  
EXREF 77.00 ppm  
BF 0.10 Hz  
RGAIN 29

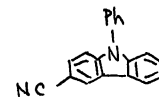

Exp-436(4)-recrystal

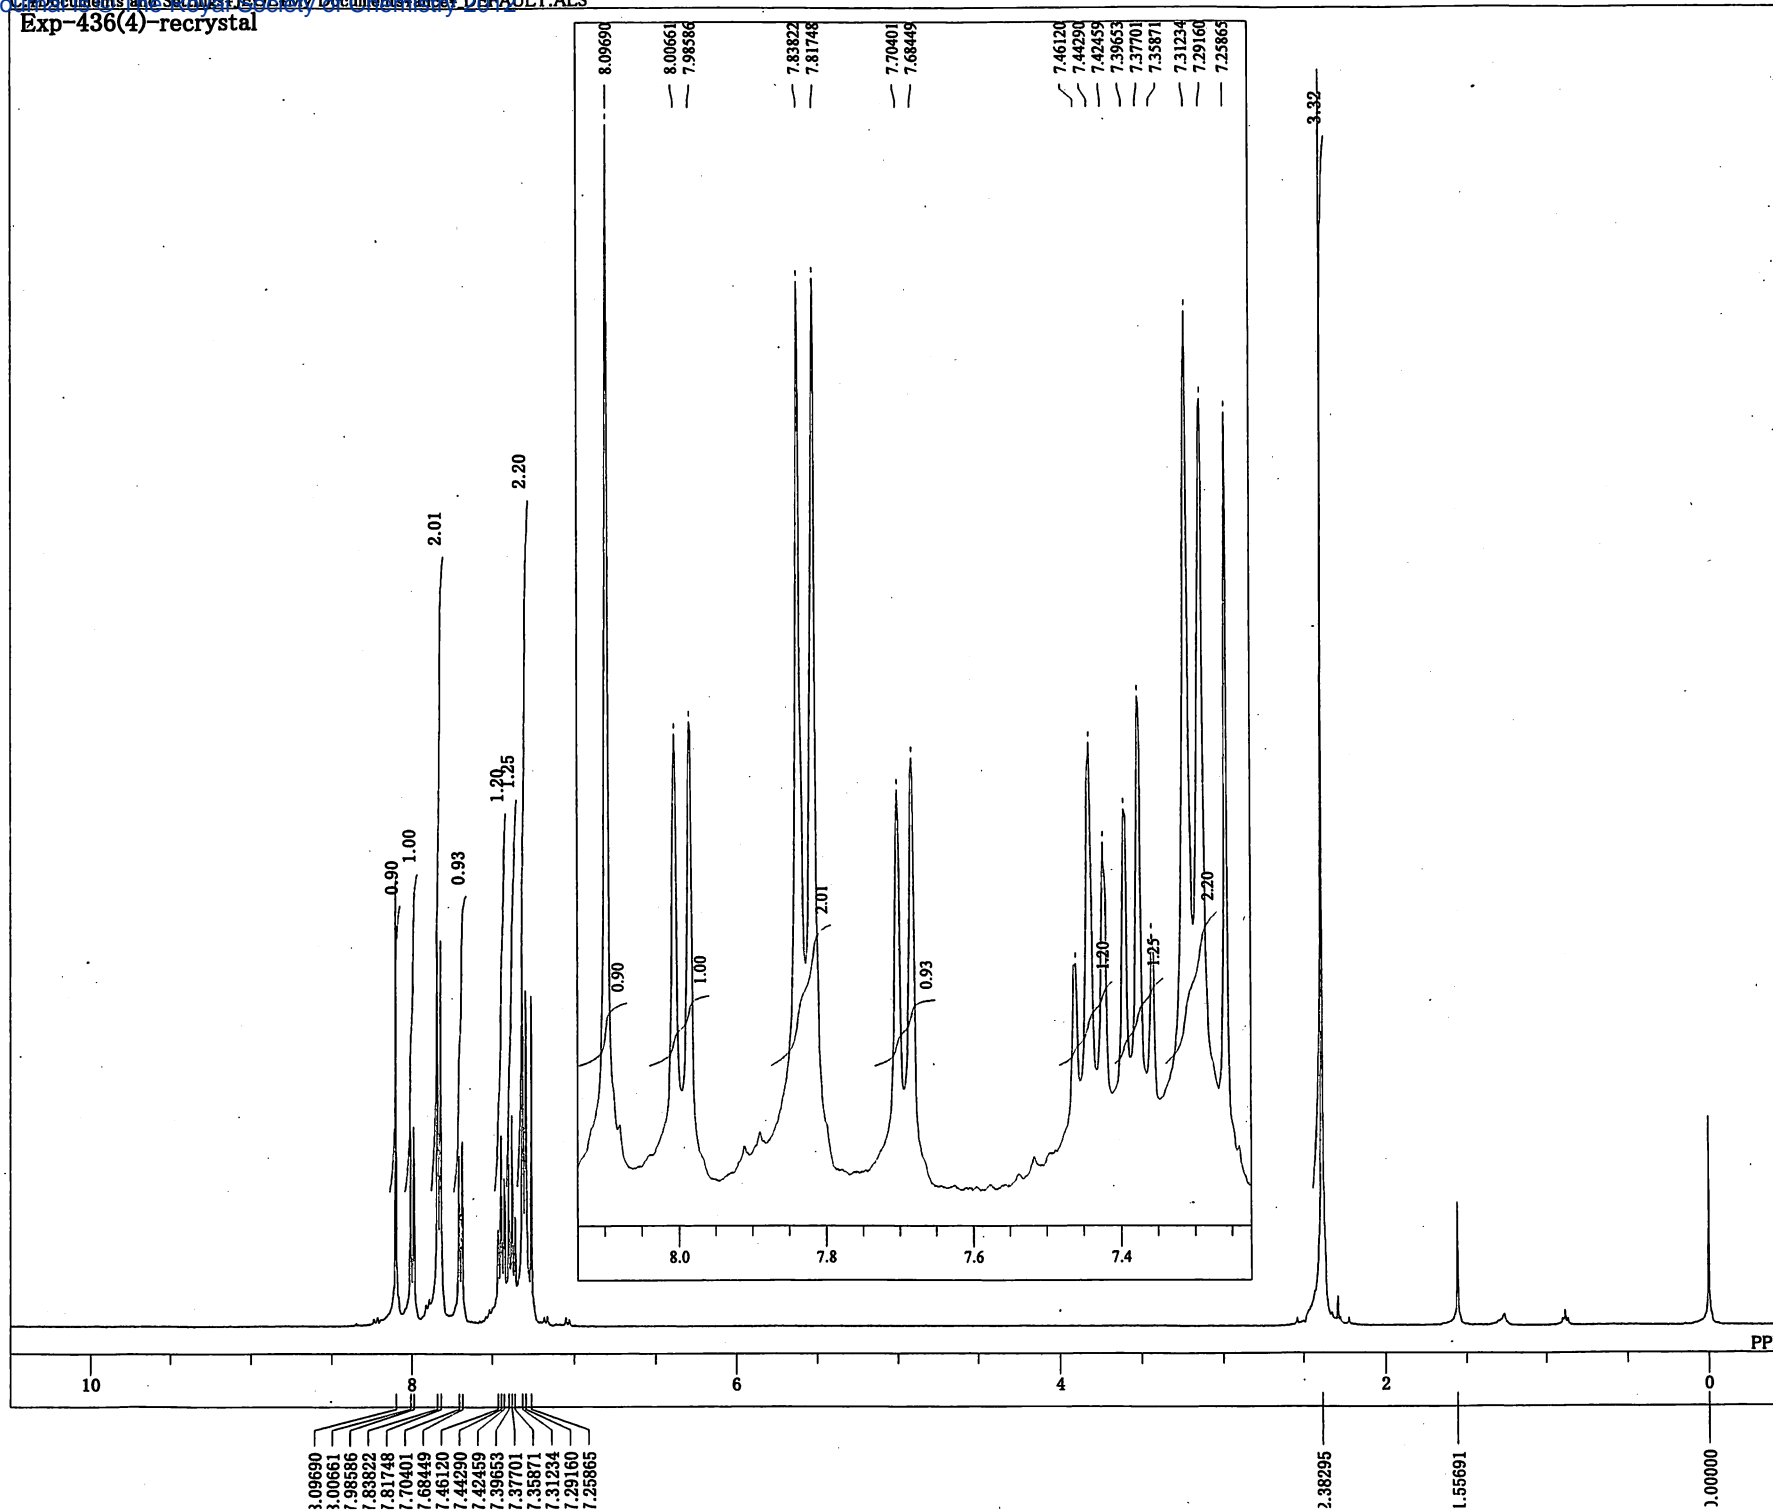

DFILE \_DEFAULT.ALS  
COMNT Exp-436(4)-recrystal  
DATIM Wed Jan 25 15:42:02 2012  
OBNUC 1H  
EXMOD NON  
OBFRQ 399.65 MHz  
OBSET 124.00 KHz  
OBFIN 10500.00 Hz  
POINT 16384  
FREQU 7992.01 Hz  
SCANS 16  
ACQTM 2.0501 sec  
PD 2.9500 sec  
PW1 7.20 usec  
IRNUC 1H  
CTEMP 27.4 c  
SLVNT CDCL3  
EXREF 0.00 ppm  
BF 0.10 Hz  
RGAIN 19

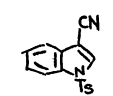

Exp-436(4)-recrystal-13C

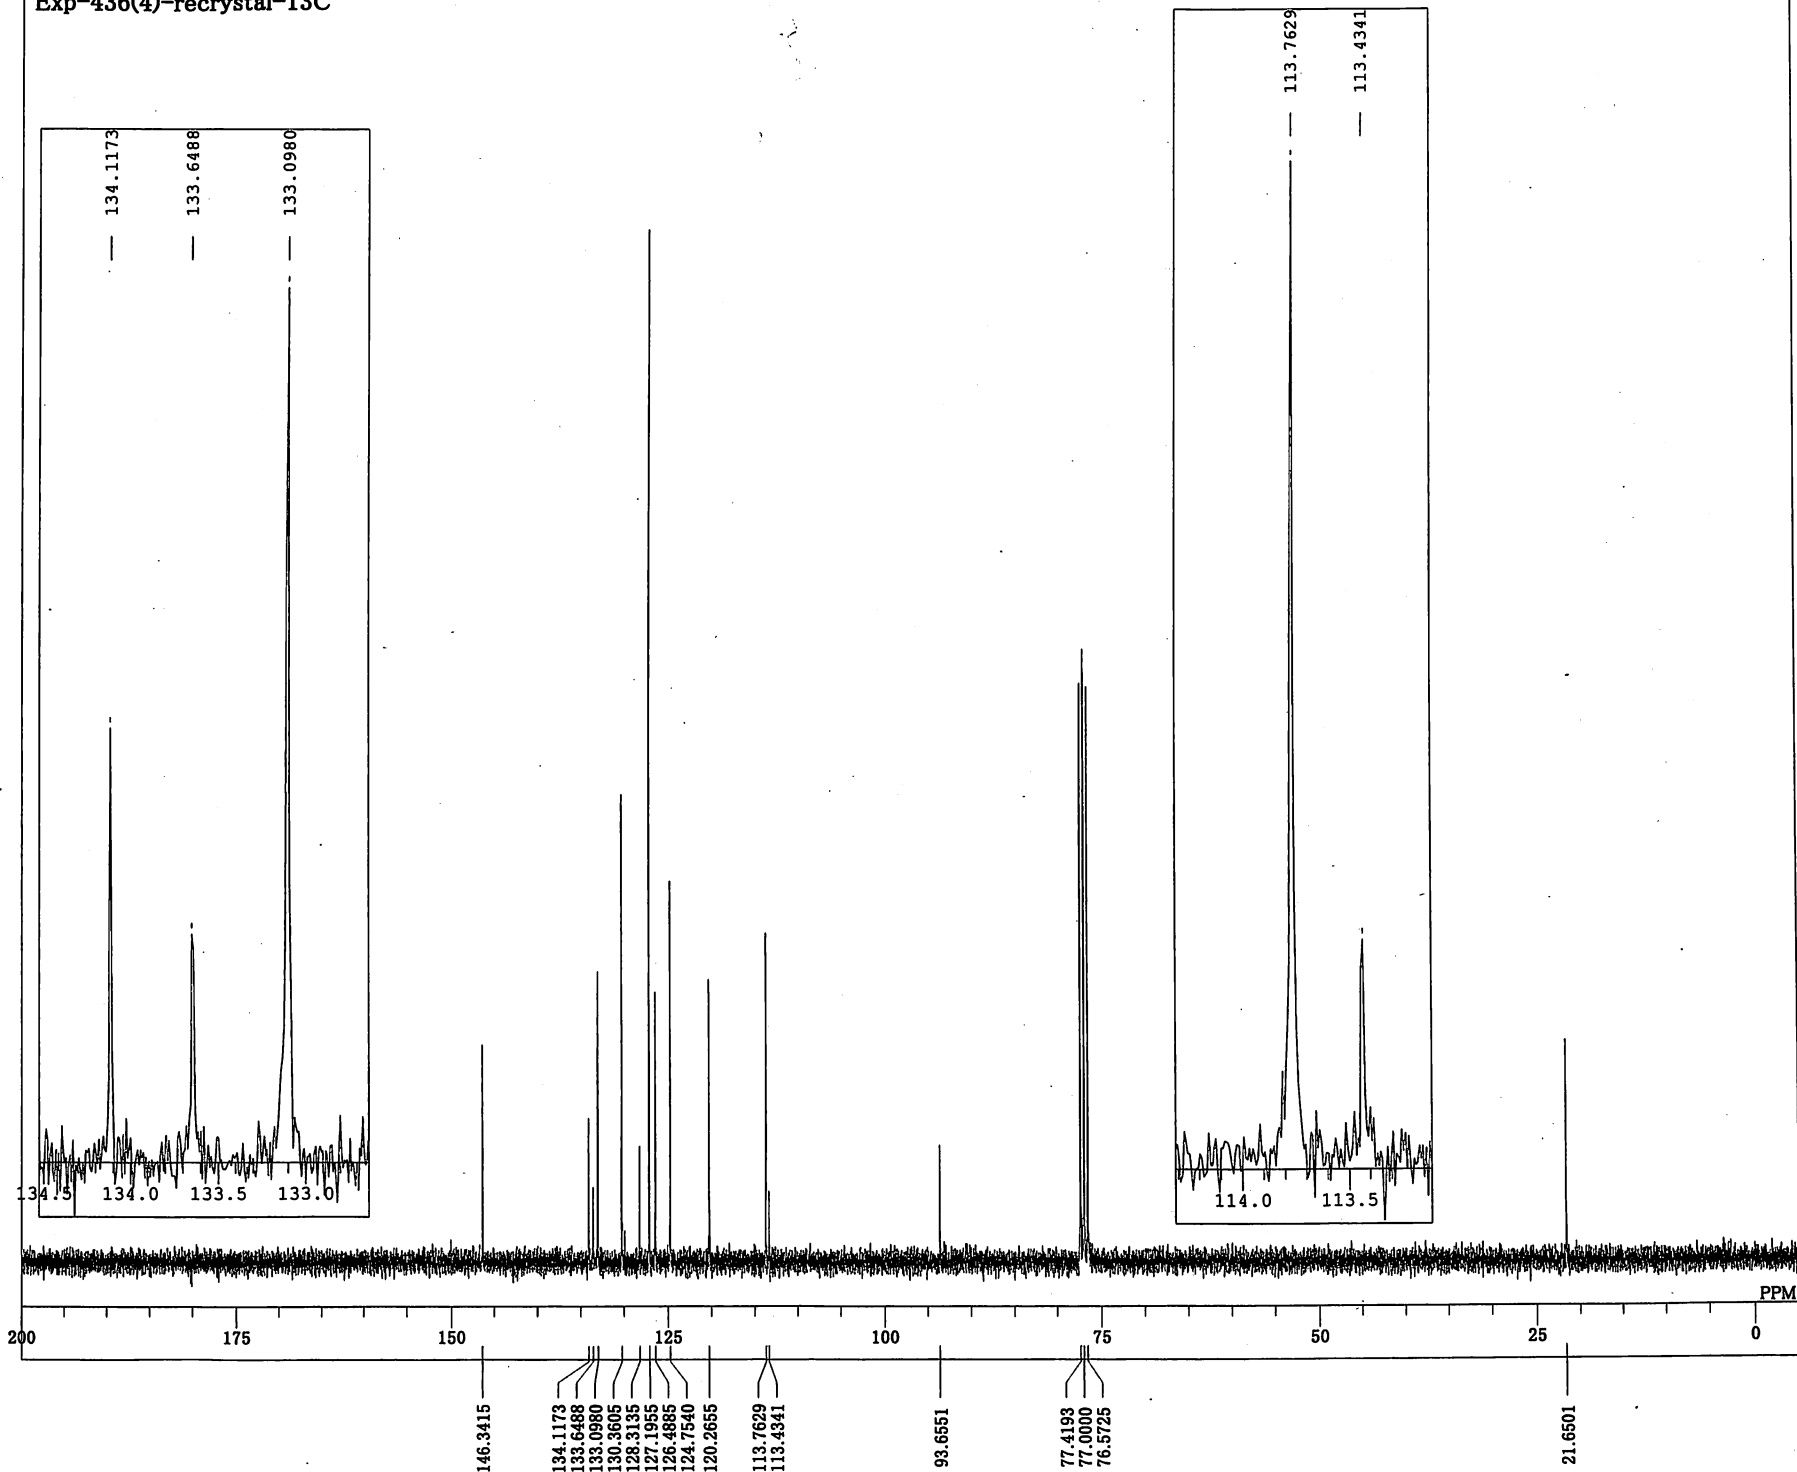

|       |                                |
|-------|--------------------------------|
| MENUF | BCM                            |
| OBNUC | 13C                            |
| OFF   | 75.45 MHz                      |
| OBSET | 124.00 KHz                     |
| OBFIN | 1840.00 Hz                     |
| PW1   | 4.50 usec                      |
| DEADT | 27.20 usec                     |
| PREDL | 0.20000 msec                   |
| IWT   | 1.0000 msec                    |
| POINT | 32768                          |
| SFO   | 32768                          |
| TIMES | 1000                           |
| DUMMY | 1                              |
| FREQU | 20356.23 Hz                    |
| FLT   | 10200 Hz                       |
| DELAY | 19.60 usec                     |
| ACQTM | 1.6097 sec                     |
| PD    | 1.3900 sec                     |
| ADBIT | 16                             |
| RGAIN | 28                             |
| BF    | 0.10 Hz                        |
| T1    | 0.00                           |
| T2    | 0.00                           |
| T3    | 90.00                          |
| T4    | 100.00                         |
| EXMOD | BCM                            |
| EXPCM | Bilevel.complete.decoupling:Se |
| IRNUC | 1H                             |
| IFR   | 300.40 MHz                     |
| IRSET | 130.00 KHz                     |
| IRFIN | 1150.00 Hz                     |
| IRRPW | 50 usec                        |
| IRATN | 511                            |
| DFILE | _DEFAULT.ALS                   |
| SF    | TH5                            |
| LKSET | 25.60 KHz                      |
| LKFIN | 52.0 Hz                        |
| LKLEV | 200                            |
| LGAIN | 26                             |
| LKPHS | 201                            |
| LKSIG | 414                            |
| CSPED | 12 Hz                          |
| FILDC |                                |
| FILDF |                                |

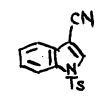

Supplement: c2cc18008a.pdf [file c2cc18008a.pdf]
